# Supplementary material for: Colletotrikalactones A and B, unusual tricyclic polyketides from mangrove associated fungus Colletotrichum sp. J065
Source: Royal Society of Chemistry journal article supplement (doi:10.1039/d4nj02991g), 2024-01-01

# **Colletotrikalactones A and B, Unusual Tricyclic Polyketides from Mangrove Associated Fungus *Colletotrichum* sp. J065**

Ziqian Zeng<sup>[a], ⊥</sup>, Shujie Jia<sup>[a], ⊥</sup>, Yang Jin<sup>[a]</sup>, Peishan Gu<sup>[a]</sup>, Jing Yang<sup>[b]</sup>, Zhaolin

Chen<sup>[a]</sup>, Wenbin Deng<sup>[a]</sup>, Yongbo Xue<sup>\*, [a]</sup>

<sup>[a]</sup> Z. Zeng, S. Jia, Y. Jin, P. Gu, Dr. Prof. W. Deng, Dr. Prof. Y. Xue

*School of Pharmaceutical Sciences (Shenzhen), Sun Yat-sen University, Shenzhen 518107, P. R. China*

*E-mail: xueyb@mail.sysu.edu.cn*

<sup>[b]</sup> Dr. J. Yang

*State Key Laboratory of Phytochemistry and Plant Resources in West China, Kunming Institute of Botany,*

*Chinese Academy of Sciences, Kunming 650204, P. R. China*

## List of Supporting Information

|                                                                                                                                                                             |    |
|-----------------------------------------------------------------------------------------------------------------------------------------------------------------------------|----|
| <b>Figure S1.</b> HRESIMS spectrum of compound <b>1</b> .....                                                                                                               | 5  |
| <b>Figure S2.</b> IR spectrum of compound <b>1</b> .....                                                                                                                    | 6  |
| <b>Figure S3.</b> Optical rotation spectrum of compound <b>1</b> .....                                                                                                      | 7  |
| <b>Figure S4.</b> <sup>1</sup> H NMR spectrum of compound <b>1</b> in DMSO- <i>d</i> <sub>6</sub> (600 MHz) .....                                                           | 8  |
| <b>Figure S5.</b> <sup>13</sup> C NMR spectrum of compound <b>1</b> in DMSO- <i>d</i> <sub>6</sub> (150 MHz) .....                                                          | 9  |
| <b>Figure S6.</b> DEPT 135 spectrum of compound <b>1</b> in DMSO- <i>d</i> <sub>6</sub> (150 MHz) .....                                                                     | 10 |
| <b>Figure S7.</b> HSQC spectrum of compound <b>1</b> in DMSO- <i>d</i> <sub>6</sub> (600 MHz) .....                                                                         | 11 |
| <b>Figure S8.</b> <sup>1</sup> H- <sup>1</sup> H COSY spectrum of compound <b>1</b> in DMSO- <i>d</i> <sub>6</sub> (600 MHz) .....                                          | 12 |
| <b>Figure S9.</b> HMBC spectrum of compound <b>1</b> in DMSO- <i>d</i> <sub>6</sub> (600 MHz) .....                                                                         | 13 |
| <b>Figure S10.</b> ROESY spectrum of compound <b>1</b> in DMSO- <i>d</i> <sub>6</sub> (600 MHz) .....                                                                       | 14 |
| <b>Figure S11.</b> Possible isomers of <b>1</b> (four types of relative configuration) .....                                                                                | 15 |
| <b>Figure S12.</b> Detailed results of the DP4+ probability analysis of <b>1</b> .....                                                                                      | 16 |
| <b>Figure S13.</b> ECD curve of compound <b>1</b> .....                                                                                                                     | 17 |
| <b>Figure S14.</b> Optimized geometries of predominant conformers for compound <b>1a</b> at the B3LYP/6-31G(d,p) level in the gas phase .....                               | 18 |
| <b>Table S1.</b> Important thermodynamic parameters (a.u.) and Boltzmann distributions of the optimized compound <b>1a</b> at B3LYP/6-31G(d,p) level in the gas phase ..... | 19 |
| <b>Table S2.</b> Optimized Z-matrixes of compound <b>1a</b> in the gas phase (Å) at B3LYP/6-31G(d,p) level .....                                                            | 20 |
| <b>Figure S15.</b> HRESIMS spectrum of compound <b>2</b> .....                                                                                                              | 23 |
| <b>Figure S16.</b> IR spectrum of compound <b>2</b> .....                                                                                                                   | 24 |
| <b>Figure S17.</b> Optical rotation spectrum of compound <b>2</b> .....                                                                                                     | 25 |
| <b>Figure S18.</b> <sup>1</sup> H NMR spectrum of compound <b>2</b> in DMSO- <i>d</i> <sub>6</sub> (600 MHz) .....                                                          | 26 |
| <b>Figure S19.</b> <sup>13</sup> C NMR spectrum of compound <b>2</b> in DMSO- <i>d</i> <sub>6</sub> (150 MHz) .....                                                         | 27 |
| <b>Figure S20.</b> DEPT spectrum of compound <b>2</b> in DMSO- <i>d</i> <sub>6</sub> (150 MHz) .....                                                                        | 28 |
| <b>Figure S21.</b> (a) Key HMBC (arrow) and <sup>1</sup> H- <sup>1</sup> H COSY (bold) correlations of <b>2</b> ; (b) Key ROESY correlations of <b>2</b> .....              | 29 |
| <b>Figure S23.</b> <sup>1</sup> H- <sup>1</sup> H COSY spectrum of compound <b>2</b> in DMSO- <i>d</i> <sub>6</sub> (600 MHz) .....                                         | 31 |
| <b>Figure S24.</b> HMBC spectrum of compound <b>2</b> in DMSO- <i>d</i> <sub>6</sub> (600 MHz) .....                                                                        | 32 |
| <b>Figure S25.</b> ROESY spectrum of compound <b>2</b> in DMSO- <i>d</i> <sub>6</sub> (600 MHz) .....                                                                       | 33 |
| <b>Figure S26.</b> ECD curve of compound <b>2</b> .....                                                                                                                     | 34 |

|                                                                                                          |    |
|----------------------------------------------------------------------------------------------------------|----|
| <b>Figure S27.</b> $^1\text{H}$ NMR spectrum of compound <b>3</b> in methanol- $d_4$ (600 MHz) .....     | 35 |
| <b>Figure S28.</b> $^{13}\text{C}$ NMR spectrum of compound <b>3</b> in methanol- $d_4$ (125 MHz) .....  | 36 |
| <b>Figure S29.</b> $^1\text{H}$ NMR spectrum of compound <b>4</b> in methanol- $d_4$ (600 MHz) .....     | 37 |
| <b>Figure S30.</b> $^{13}\text{C}$ NMR spectrum of compound <b>4</b> in methanol- $d_4$ (125 MHz) .....  | 38 |
| <b>Figure S31.</b> $^1\text{H}$ NMR spectrum of compound <b>5</b> in methanol- $d_4$ (600 MHz) .....     | 39 |
| <b>Figure S32.</b> $^{13}\text{C}$ NMR spectrum of compound <b>5</b> in methanol- $d_4$ (125 MHz) .....  | 40 |
| <b>Figure S33.</b> $^1\text{H}$ NMR spectrum of compound <b>6</b> in methanol- $d_4$ (600 MHz) .....     | 41 |
| <b>Figure S34.</b> $^{13}\text{C}$ NMR spectrum of compound <b>6</b> in methanol- $d_4$ (125 MHz) .....  | 42 |
| <b>Figure S35.</b> $^1\text{H}$ NMR spectrum of compound <b>7</b> in methanol- $d_4$ (600 MHz) .....     | 43 |
| <b>Figure S36.</b> $^{13}\text{C}$ NMR spectrum of compound <b>7</b> in methanol- $d_4$ (125 MHz) .....  | 44 |
| <b>Figure S37.</b> $^1\text{H}$ NMR spectrum of compound <b>8</b> in methanol- $d_4$ (600 MHz) .....     | 45 |
| <b>Figure S38.</b> $^{13}\text{C}$ NMR spectrum of compound <b>8</b> in methanol- $d_4$ (125 MHz) .....  | 46 |
| <b>Figure S39.</b> $^1\text{H}$ NMR spectrum of compound <b>9</b> in methanol- $d_4$ (600 MHz) .....     | 47 |
| <b>Figure S40.</b> $^{13}\text{C}$ NMR spectrum of compound <b>9</b> in methanol- $d_4$ (125 MHz) .....  | 48 |
| <b>Figure S41.</b> $^1\text{H}$ NMR spectrum of compound <b>10</b> in methanol- $d_4$ (600 MHz) .....    | 49 |
| <b>Figure S42.</b> $^{13}\text{C}$ NMR spectrum of compound <b>10</b> in methanol- $d_4$ (125 MHz) ..... | 50 |
| <b>Figure S43.</b> $^1\text{H}$ NMR spectrum of compound <b>11</b> in methanol- $d_4$ (600 MHz) .....    | 51 |
| <b>Figure S44.</b> $^{13}\text{C}$ NMR spectrum of compound <b>11</b> in methanol- $d_4$ (125 MHz) ..... | 52 |
| <b>Figure S45.</b> $^1\text{H}$ NMR spectrum of compound <b>12</b> in methanol- $d_4$ (600 MHz) .....    | 53 |
| <b>Figure S46.</b> $^{13}\text{C}$ NMR spectrum of compound <b>12</b> in methanol- $d_4$ (125 MHz) ..... | 54 |
| <b>Figure S47.</b> $^1\text{H}$ NMR spectrum of compound <b>13</b> in methanol- $d_4$ (600 MHz) .....    | 55 |
| <b>Figure S48.</b> $^{13}\text{C}$ NMR spectrum of compound <b>13</b> in methanol- $d_4$ (125 MHz) ..... | 56 |

Figure S1. HRESIMS spectrum of compound 1

User Spectra

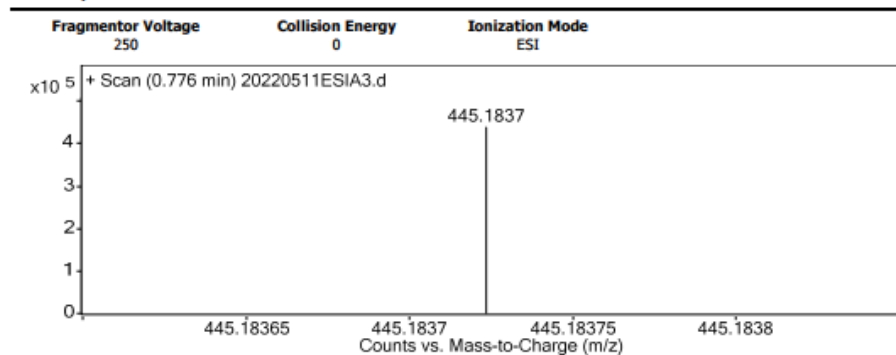

Peak List

| m/z      | z | Abund     | Formula                                           | Ion |
|----------|---|-----------|---------------------------------------------------|-----|
| 274.2737 | 1 | 80487.79  |                                                   |     |
| 445.1837 | 1 | 438057.66 | C <sub>22</sub> H <sub>30</sub> Na O <sub>8</sub> | M+  |
| 446.1864 | 1 | 96446.55  | C <sub>22</sub> H <sub>30</sub> Na O <sub>8</sub> | M+  |
| 461.1579 | 1 | 141662.89 |                                                   |     |
| 653.2728 | 2 | 100096.79 |                                                   |     |
| 653.7742 | 2 | 73834.44  |                                                   |     |
| 867.3771 | 1 | 297287.19 |                                                   |     |
| 868.38   | 1 | 138769.64 |                                                   |     |
| 922.0098 | 1 | 246440.88 |                                                   |     |
| 1289.57  | 1 | 88526.82  |                                                   |     |

Formula Calculator Element Limits

| Element | Min | Max |
|---------|-----|-----|
| C       | 0   | 200 |
| H       | 0   | 400 |
| O       | 0   | 10  |
| Na      | 1   | 1   |

Formula Calculator Results

| Formula                                           | CalculatedMass | Mz       | Diff. (mDa) | Diff. (ppm) | DBE |
|---------------------------------------------------|----------------|----------|-------------|-------------|-----|
| C <sub>22</sub> H <sub>30</sub> Na O <sub>8</sub> | 445.1838       | 445.1837 | 0.1         | 0.3         | 7.5 |

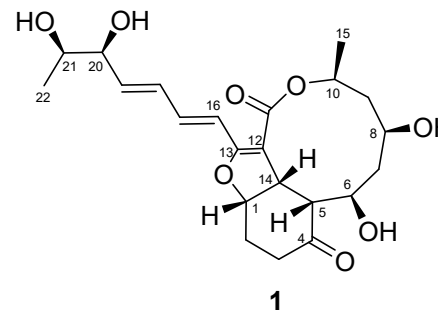

Figure S2. IR spectrum of compound 1

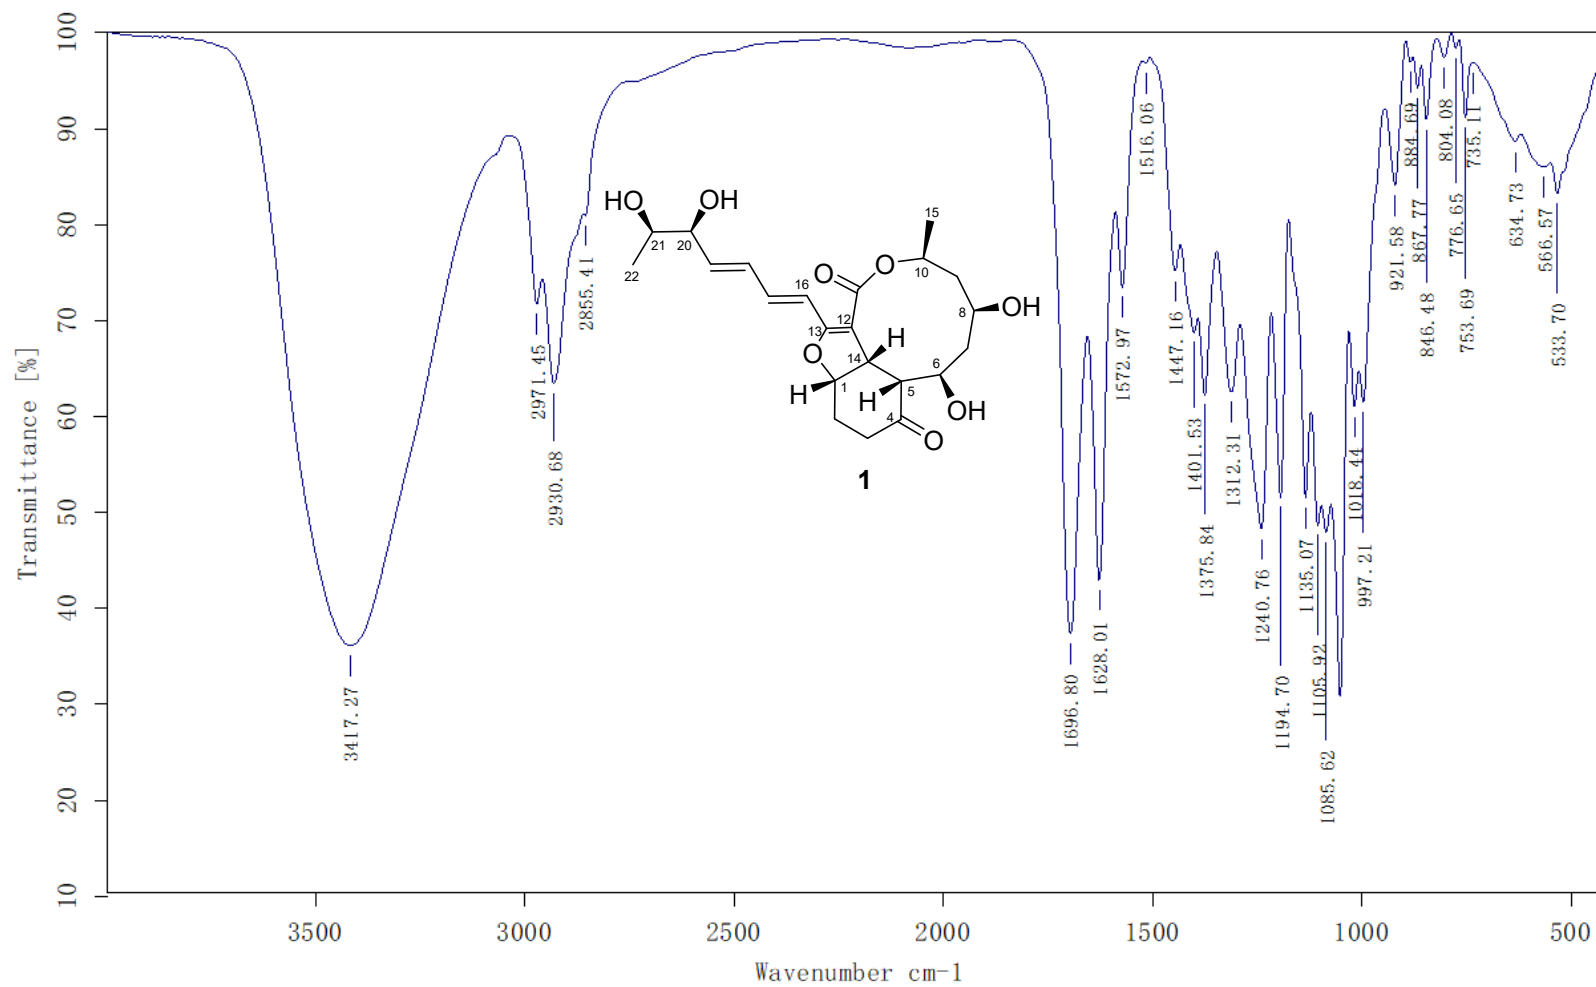

**Figure S3.** Optical rotation spectrum of compound **1**

**Rudolph Research Analytical**

This sample was measured on an Autopol VI, Serial #91058  
 Manufactured by Rudolph Research Analytical, Hackettstown, NJ, USA.

Measurement Date : Thursday, 18-AUG-2022

Set Temperature : 25.0

Time Delay : Disabled

Delay between Measurement : Disabled

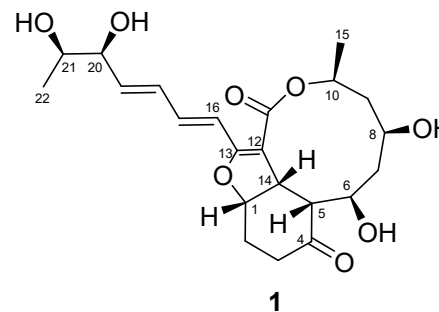

| <u>n</u> | <u>Average</u> | <u>Std.Dev.</u> | <u>% RSD</u> | <u>Maximum</u> | <u>Minimum</u> |
|----------|----------------|-----------------|--------------|----------------|----------------|
| 5        | 184.80         | 0.45            | 0.24         | 185.00         | 184.00         |

| <u>S.No</u> | <u>Sample ID</u> | <u>Time</u> | <u>Result</u> | <u>Scale</u> | <u>OR °Arc</u> | <u>WLG.nm</u> | <u>Lq.mm</u> | <u>Conc.g/100ml</u> | <u>Temp.</u> |
|-------------|------------------|-------------|---------------|--------------|----------------|---------------|--------------|---------------------|--------------|
| 1           | 6A-C-19          | 02:11:31 PM | 185.00        | SR           | 0.185          | 589           | 100.00       | 0.100               | 24.9         |
| 2           | 6A-C-19          | 02:11:37 PM | 185.00        | SR           | 0.185          | 589           | 100.00       | 0.100               | 24.9         |
| 3           | 6A-C-19          | 02:11:43 PM | 185.00        | SR           | 0.185          | 589           | 100.00       | 0.100               | 25.0         |
| 4           | 6A-C-19          | 02:11:49 PM | 185.00        | SR           | 0.185          | 589           | 100.00       | 0.100               | 25.0         |
| 5           | 6A-C-19          | 02:11:56 PM | 184.00        | SR           | 0.184          | 589           | 100.00       | 0.100               | 25.0         |

Figure S4.  $^1\text{H}$  NMR spectrum of compound **1** in  $\text{DMSO-}d_6$  (600 MHz)

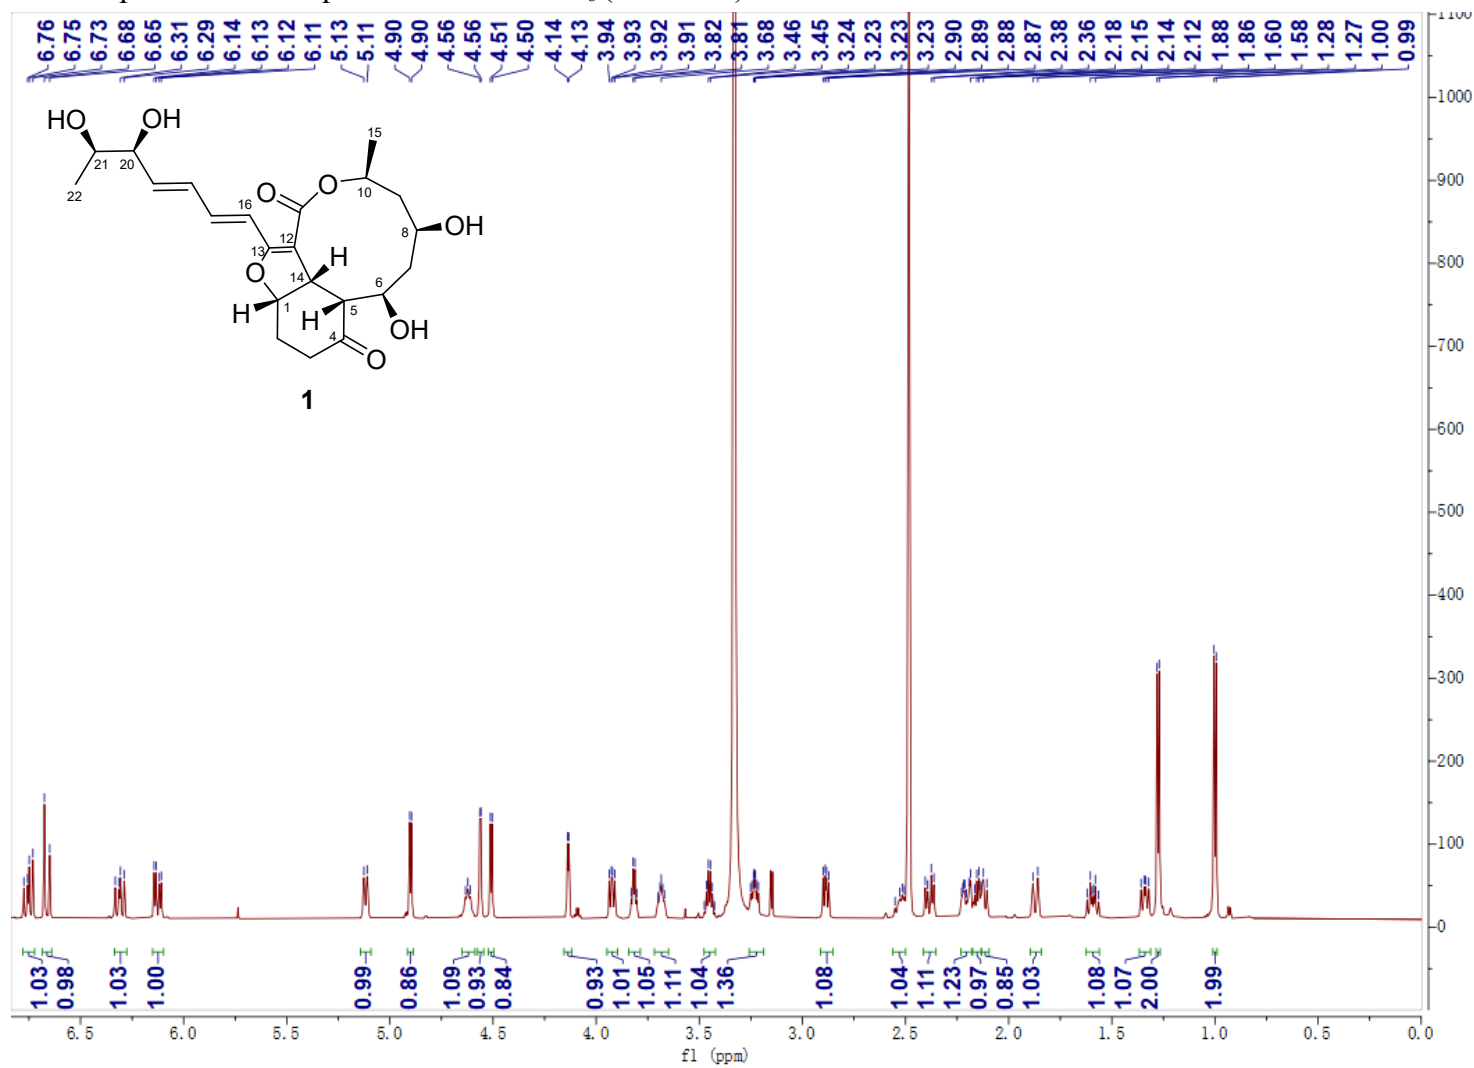

Figure S5.  $^{13}\text{C}$  NMR spectrum of compound **1** in  $\text{DMSO-}d_6$  (150 MHz)

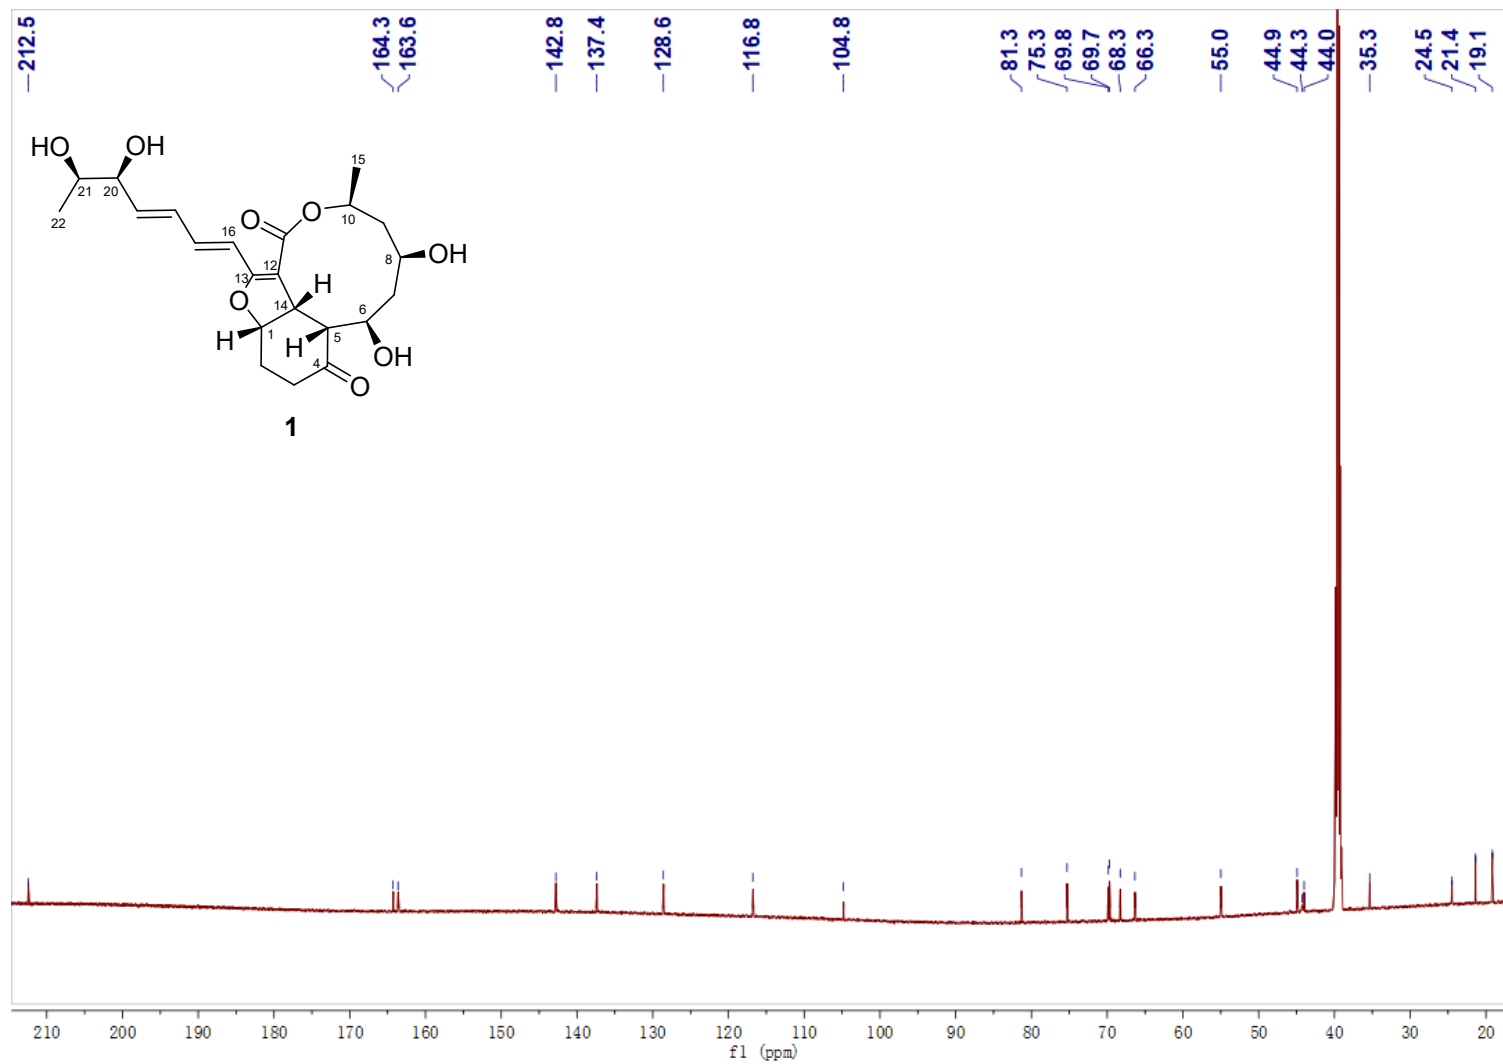



Figure S6. DEPT 135 spectrum of compound **1** in DMSO-*d*<sub>6</sub> (150 MHz)

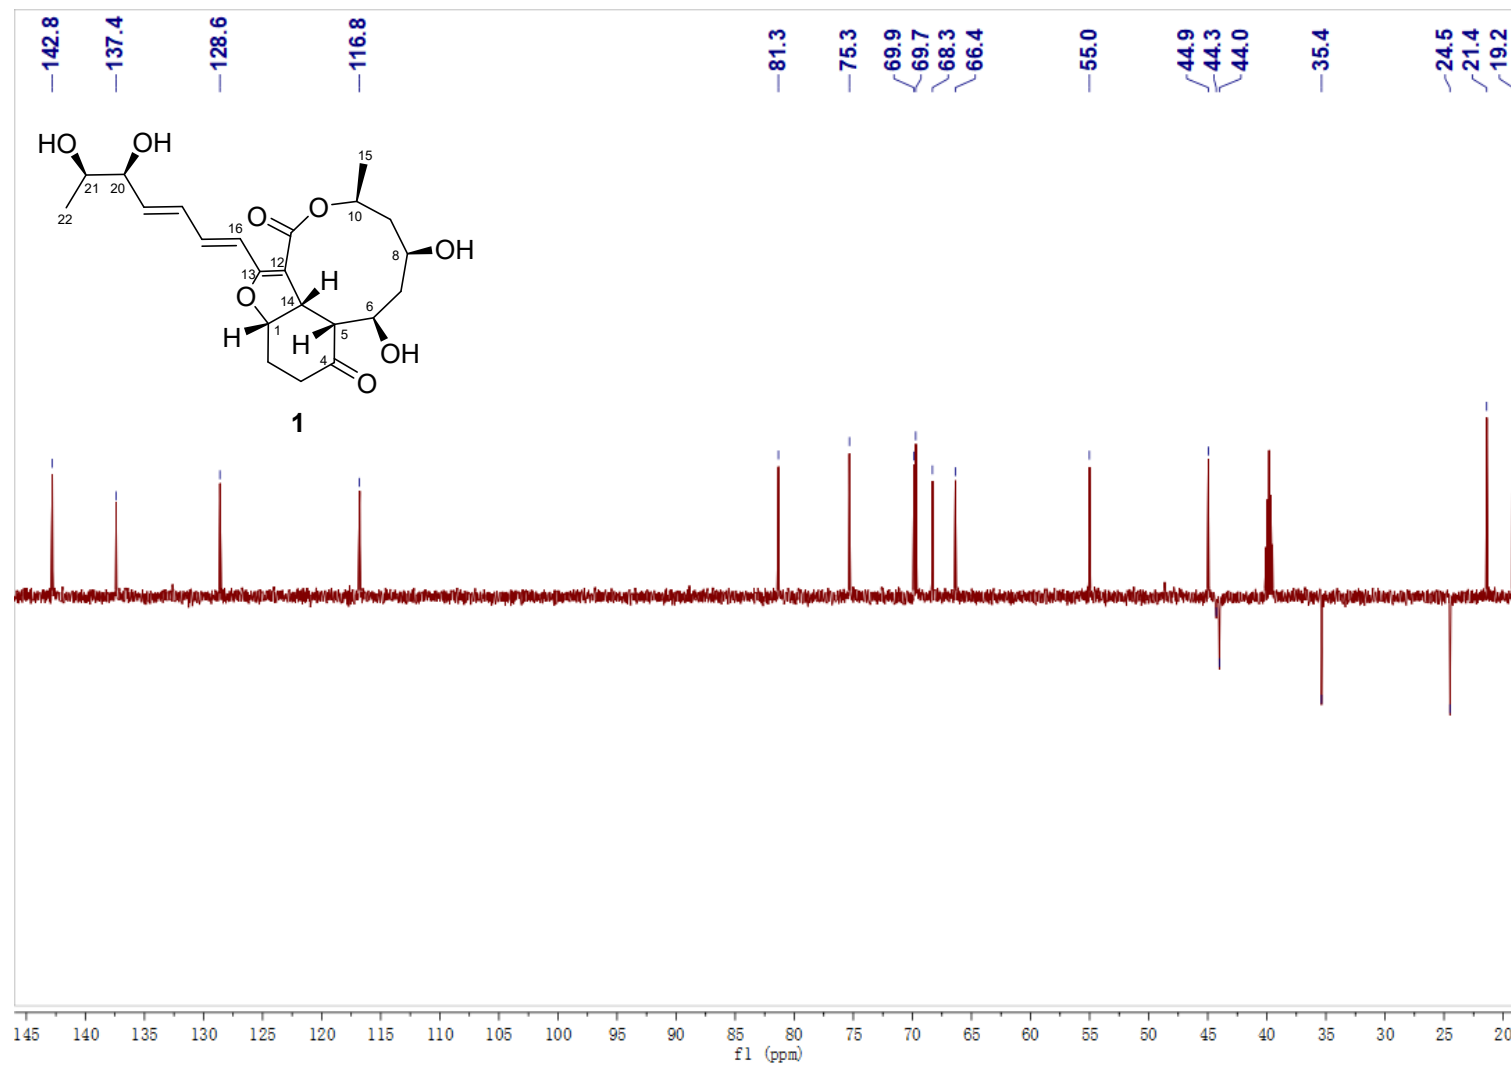

Figure S7. HSQC spectrum of compound **1** in DMSO-*d*<sub>6</sub> (600 MHz)

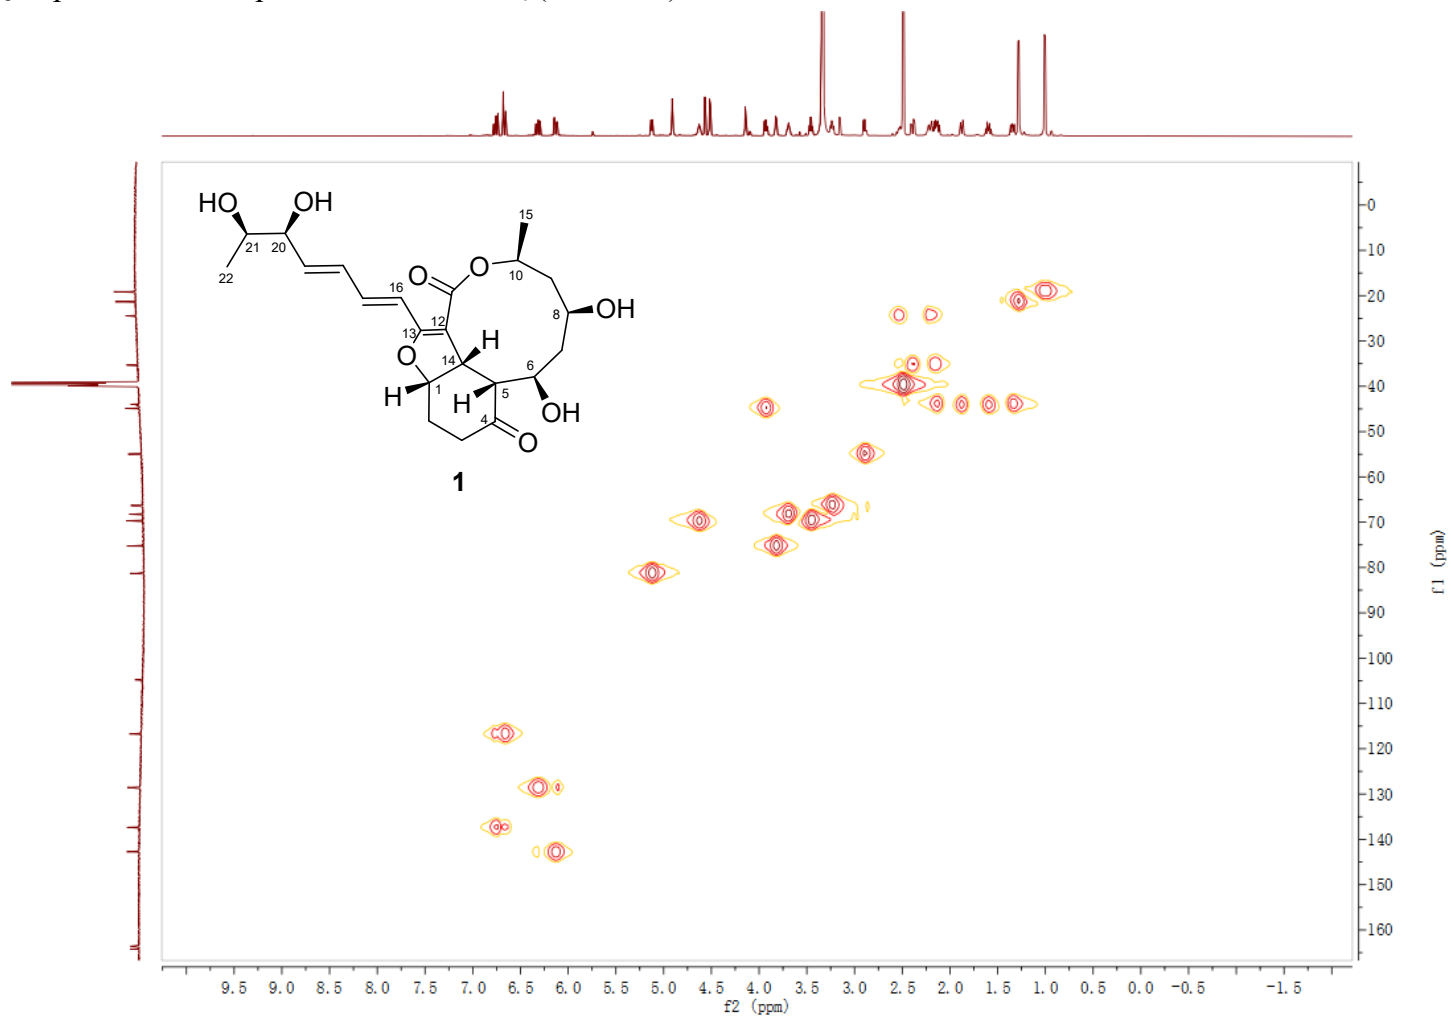

**Figure S8.**  $^1\text{H}$ - $^1\text{H}$  COSY spectrum of compound **1** in  $\text{DMSO-}d_6$  (600 MHz)

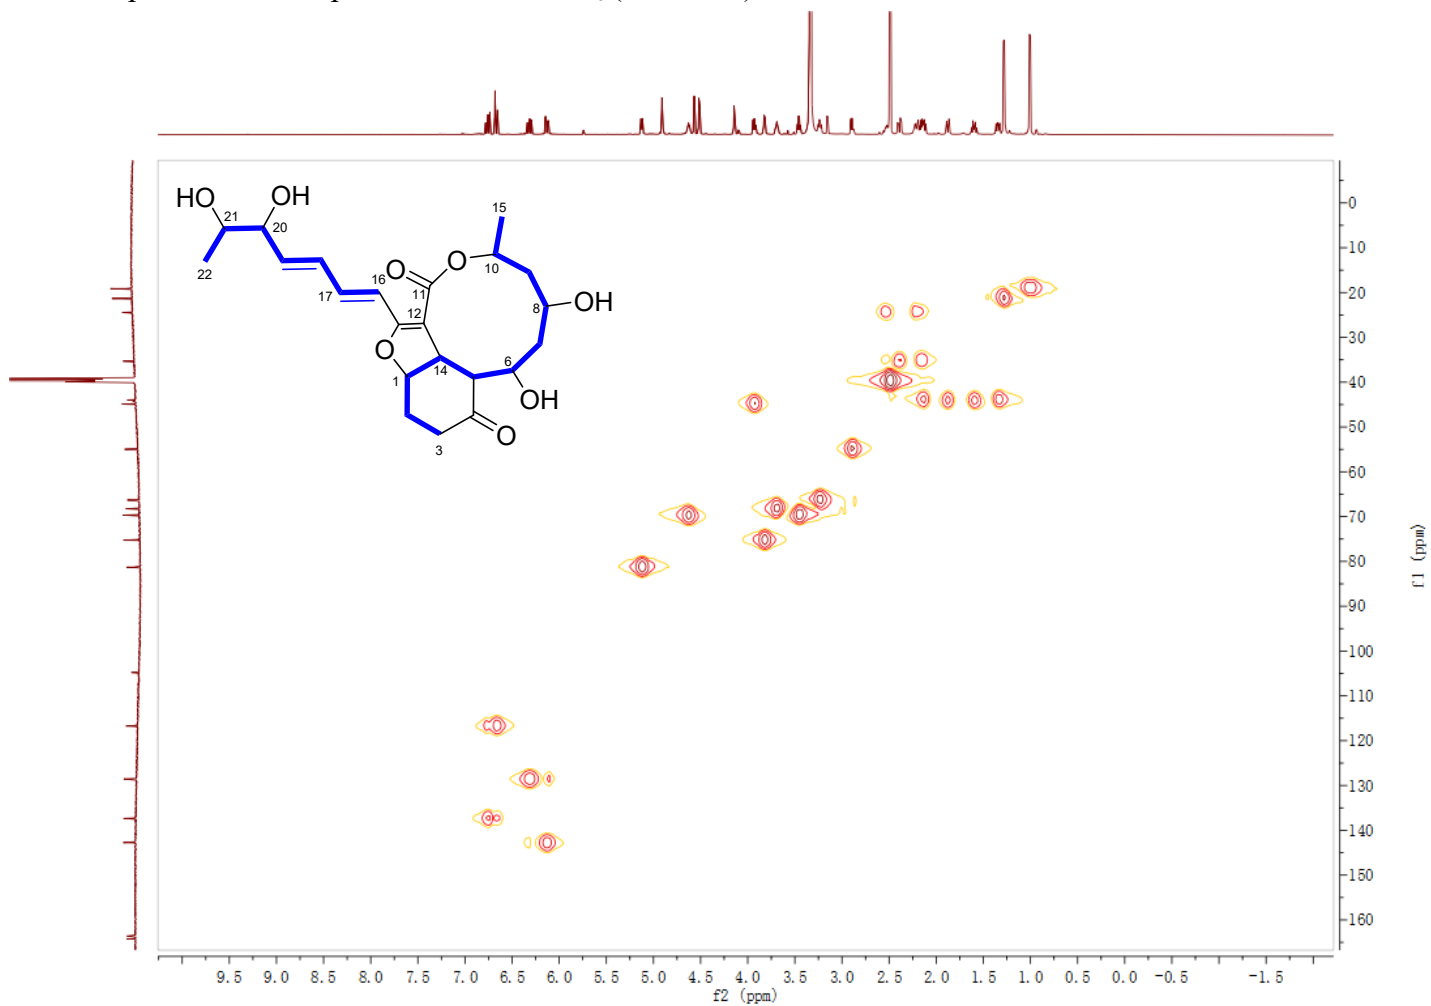

**Figure S9.** HMBC spectrum of compound **1** in DMSO- $d_6$  (600 MHz)

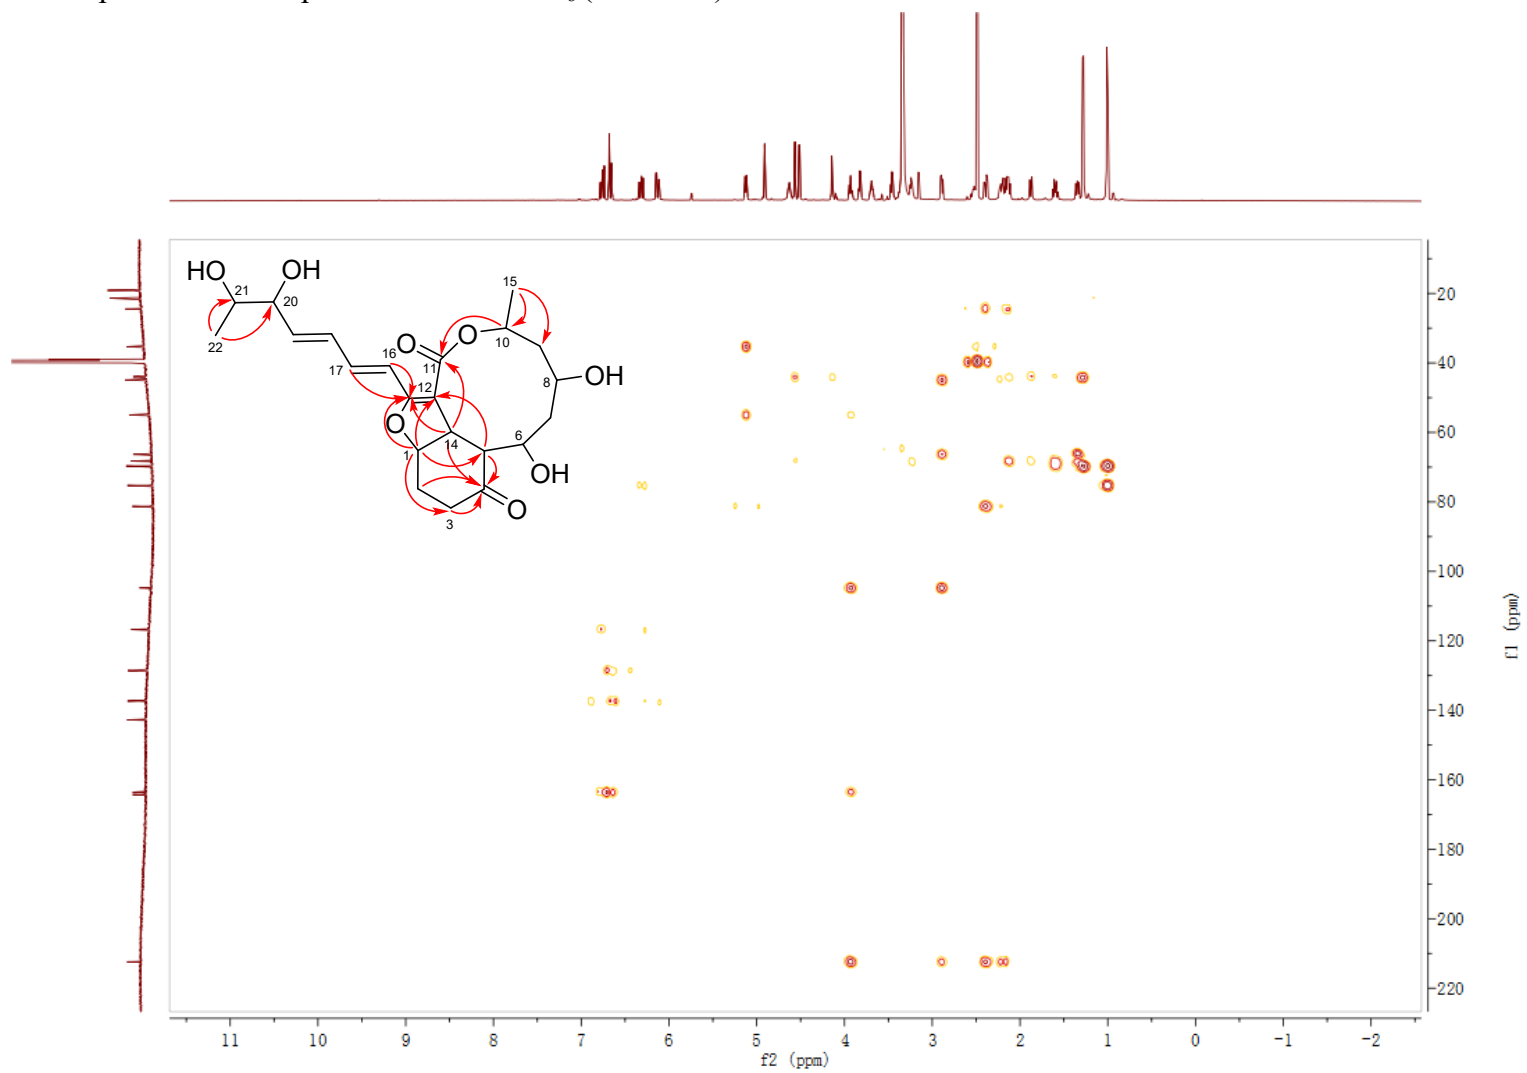

Figure S10. ROESY spectrum of compound 1 in DMSO- $d_6$  (600 MHz)

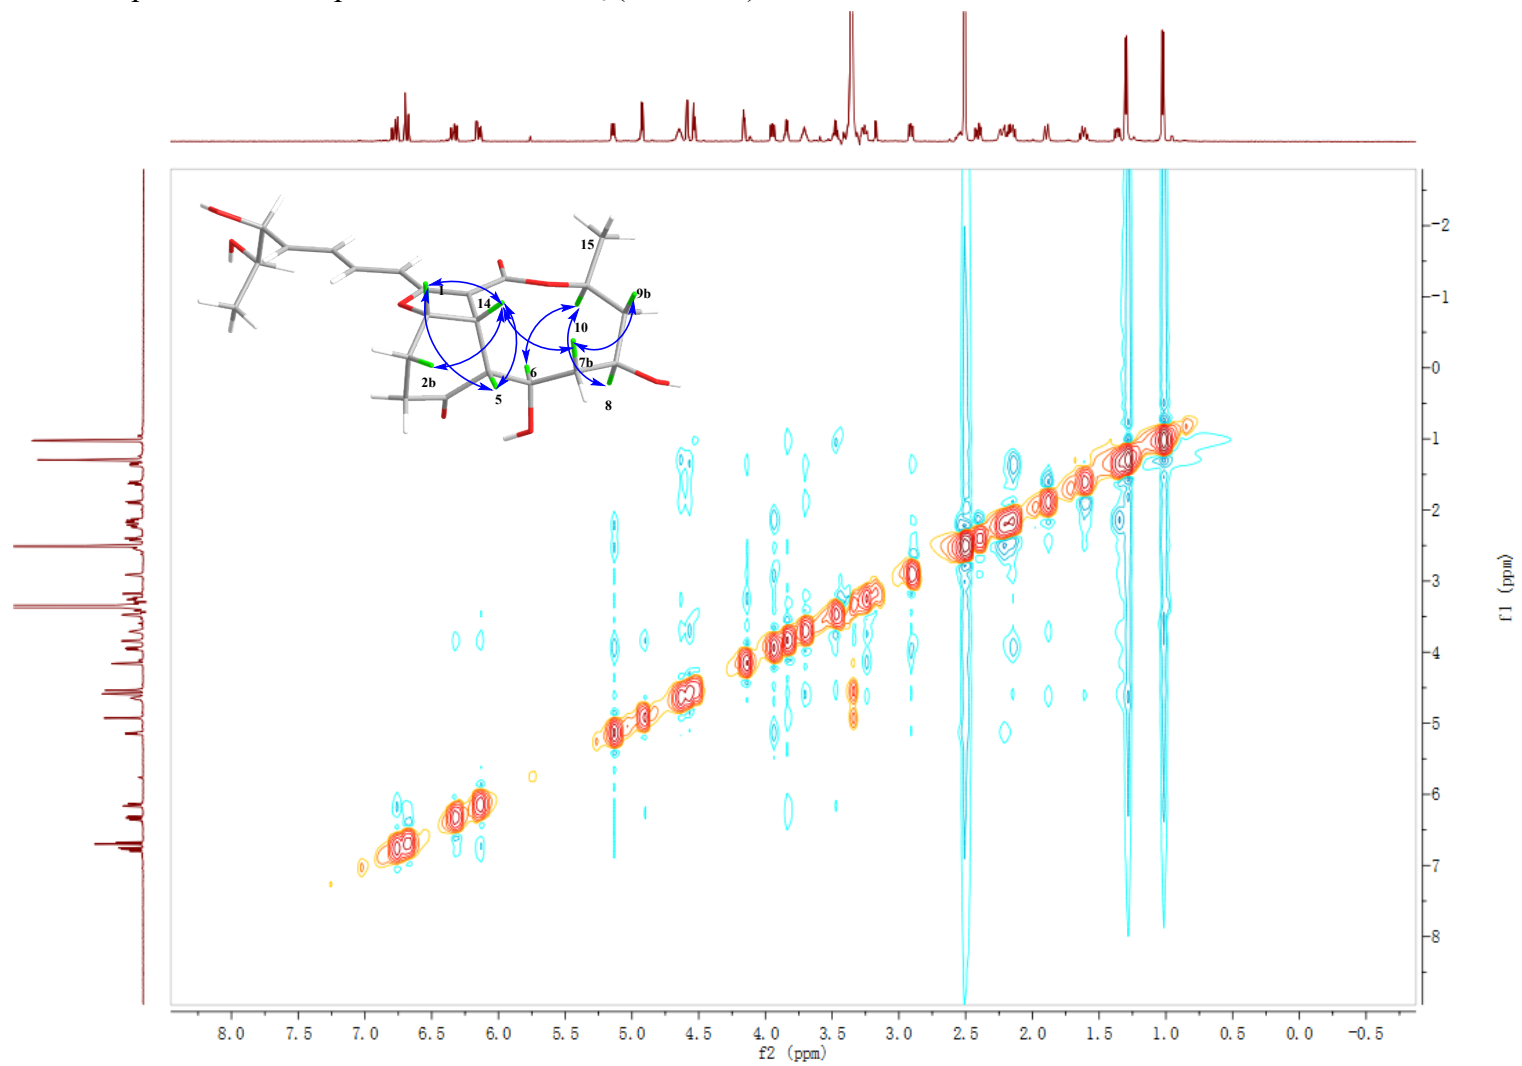

**Figure S11.** Possible isomers of **1** (four types of relative configuration)

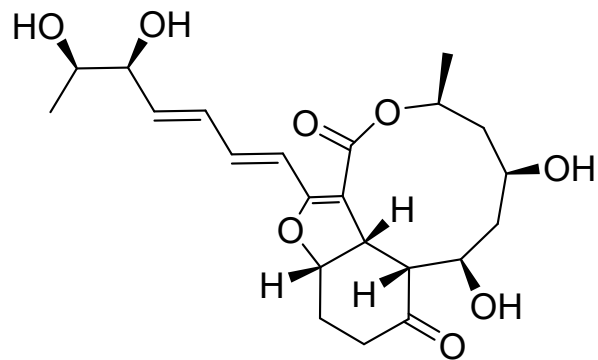

**Isomer 1-1**

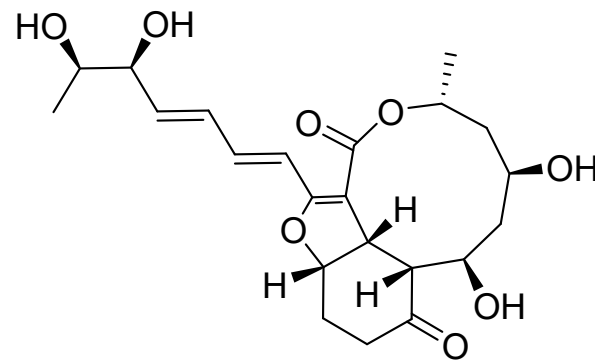

**Isomer 1-2**

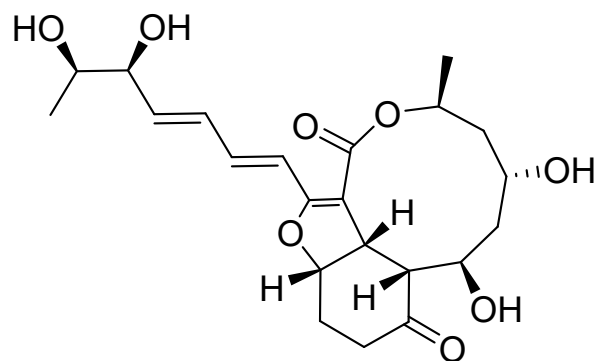

**Isomer 1-3**

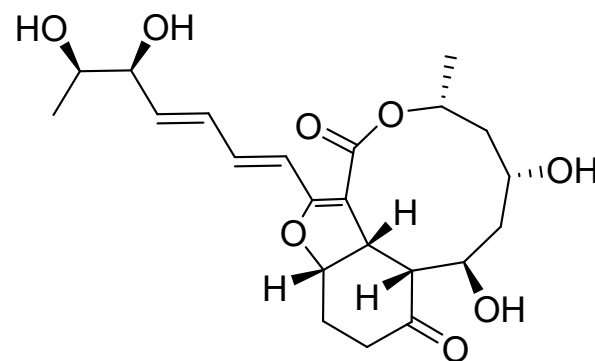

**Isomer 1-4**

**Figure S12.** Detailed results of the DP4+ probability analysis of 1

| Functional       | Solvent? |          |          |          |          |          | Basis Set     | Type of Data      |
|------------------|----------|----------|----------|----------|----------|----------|---------------|-------------------|
| mPW1PW91         | PCM      |          |          |          |          |          | 6-311+G(d, p) | Shielding Tensors |
|                  | Isomer 1 | Isomer 2 | Isomer 3 | Isomer 4 | Isomer 5 | Isomer 6 |               |                   |
| sDP4+ (H data)   | 16.59%   | 0.00%    | 26.29%   | 57.12%   | –        | –        |               |                   |
| sDP4+ (C data)   | 99.78%   | 0.00%    | 0.22%    | 0.00%    | –        | –        |               |                   |
| sDP4+ (all data) | 99.65%   | 0.00%    | 0.35%    | 0.00%    | –        | –        |               |                   |
| uDP4+ (H data)   | 0.88%    | 0.00%    | 3.06%    | 96.05%   | –        | –        |               |                   |
| uDP4+ (C data)   | 99.99%   | 0.00%    | 0.01%    | 0.00%    | –        | –        |               |                   |
| uDP4+ (all data) | 99.97%   | 0.00%    | 0.03%    | 0.00%    | –        | –        |               |                   |
| DP4+ (H data)    | 0.26%    | 0.00%    | 1.44%    | 98.30%   | –        | –        |               |                   |
| DP4+ (C data)    | 100.00%  | 0.00%    | 0.00%    | 0.00%    | –        | –        |               |                   |
| DP4+ (all data)  | 100.00%  | 0.00%    | 0.00%    | 0.00%    | –        | –        |               |                   |

**Figure S13.** ECD curve of compound **1**

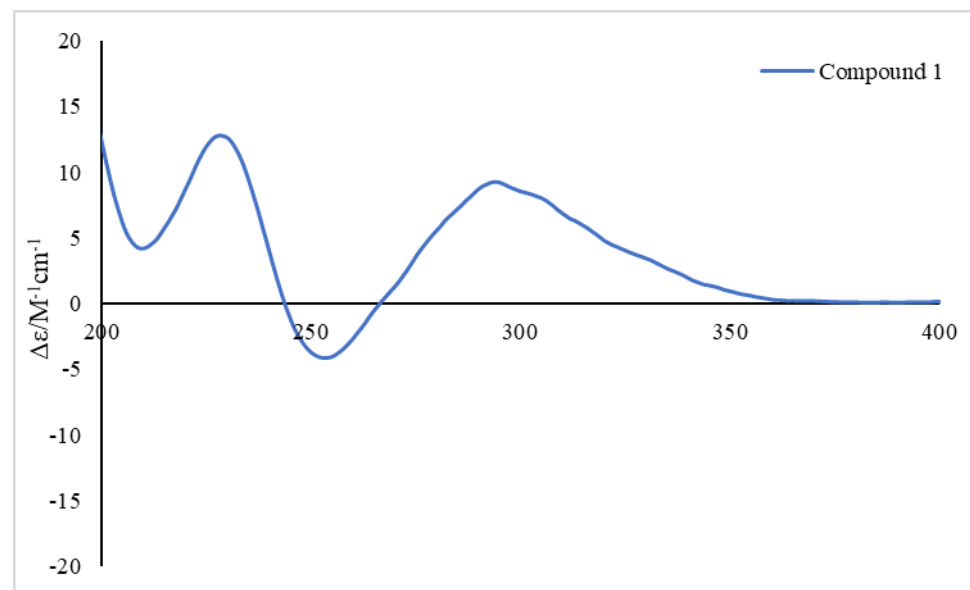



**Figure S14.** Optimized geometries of predominant conformers for compound **1a** at the B3LYP/6-31G(d,p) level in the gas phase

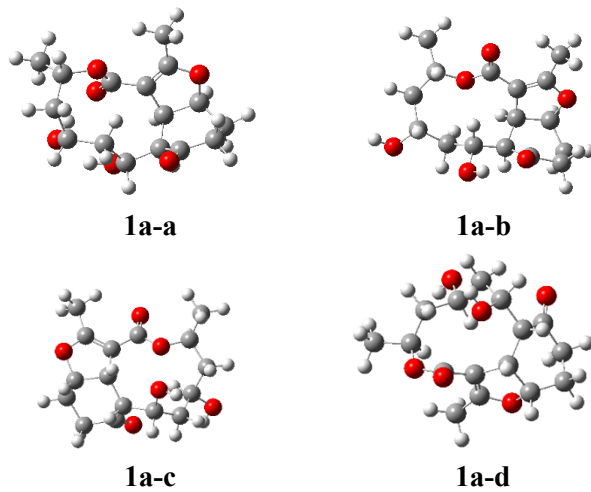

**Table S1.** Important thermodynamic parameters (a.u.) and Boltzmann distributions of the optimized compound **1a** at B3LYP/6-31G(d,p) level in the gas phase

| Conformations | E+ZPE        | G            | %   |
|---------------|--------------|--------------|-----|
| <b>1-a</b>    | -1073.928249 | -1073.974389 | 0   |
| <b>1-b</b>    | -1073.951592 | -1073.999351 | 100 |
| <b>1-c</b>    | -1073.920997 | -1073.969248 | 0   |
| <b>1-d</b>    | -1073.908469 | -1073.956760 | 0   |

E+ZPE, G: total energy with zero point energy (ZPE) and Gibbs free energy in the gas phase at B3LYP/6-31G(d,p) level., %: Boltzmann distributions, using the relative Gibbs free energies as weighting factors

**Table S2.** Optimized Z-matrixes of compound **1a** in the gas phase (Å) at B3LYP/6-31G(d,p) level

| <b>1-a</b> |           |           |           | <b>1-b</b> |           |           |           |
|------------|-----------|-----------|-----------|------------|-----------|-----------|-----------|
| C          | -0.894848 | -1.525329 | 0.823345  | C          | -1.738395 | -1.633011 | -0.592594 |
| C          | 0.088294  | -2.151411 | -0.22024  | C          | -0.593166 | -1.527989 | 0.42404   |
| C          | -2.438777 | -1.52716  | 0.562049  | C          | -3.109741 | -1.223256 | -0.027403 |
| C          | -3.121452 | -0.352627 | 1.309739  | C          | -3.552322 | 0.213004  | -0.37645  |
| C          | -3.026284 | 1.102687  | 0.774686  | C          | -2.730201 | 1.379379  | 0.173092  |
| O          | -1.635245 | 1.499017  | 0.517461  | O          | -1.394558 | 1.22431   | -0.376427 |
| C          | -0.980456 | 1.06183   | -0.581132 | C          | -0.35115  | 1.769634  | 0.304941  |
| C          | 0.478421  | 1.109356  | -0.466607 | C          | 0.911292  | 1.21958   | -0.189306 |
| C          | 1.362     | 0.030607  | -1.083945 | C          | 1.066022  | -0.05025  | -1.017228 |
| C          | 1.415848  | -1.367148 | -0.352294 | C          | 0.797762  | -1.395615 | -0.24257  |
| C          | 2.741109  | 0.753647  | -1.056534 | C          | 2.550073  | 0.084179  | -1.475968 |
| C          | 3.907992  | -0.084186 | -0.551789 | C          | 3.389402  | -1.17598  | -1.314831 |
| C          | 3.603016  | -0.662981 | 0.833734  | C          | 3.339309  | -1.672892 | 0.135878  |
| C          | 2.230546  | -1.330035 | 0.931892  | C          | 1.940826  | -1.6222   | 0.742132  |
| O          | 2.579256  | 1.890579  | -0.141345 | O          | 3.13566   | 1.126723  | -0.630319 |
| C          | 1.250787  | 2.0758    | 0.076239  | C          | 2.13103   | 1.776415  | 0.009103  |
| O          | 1.857696  | -1.831763 | 1.977593  | O          | 1.781431  | -1.753835 | 1.945759  |
| O          | -2.856928 | -1.613778 | -0.804029 | O          | -4.056506 | -2.135751 | -0.596764 |
| C          | -4.010023 | 1.469869  | -0.3398   | C          | -3.306106 | 2.738037  | -0.21638  |
| O          | -1.537687 | 0.593975  | -1.566829 | O          | -0.492179 | 2.593971  | 1.194453  |
| H          | 2.968755  | 1.188014  | -2.036843 | H          | 2.603635  | 0.460967  | -2.503472 |
| H          | 1.047995  | -0.180418 | -2.10788  | H          | 0.40818   | -0.038215 | -1.889818 |
| H          | 2.025381  | -1.981929 | -1.036083 | H          | 0.881649  | -2.204089 | -0.986278 |
| O          | -0.39542  | -2.289031 | -1.547602 | O          | -0.664059 | -2.715988 | 1.206334  |
| C          | 0.913438  | 3.316709  | 0.827669  | C          | 2.551955  | 2.970077  | 0.790445  |
| H          | -0.57097  | -0.51434  | 1.058509  | H          | -1.526695 | -1.064231 | -1.501028 |
| H          | -0.736485 | -2.066272 | 1.759903  | H          | -1.808677 | -2.68956  | -0.869391 |
| H          | 0.366226  | -3.145673 | 0.162626  | H          | -0.736962 | -0.658446 | 1.077601  |
| H          | -2.845553 | -2.441765 | 1.006786  | H          | -3.083878 | -1.349571 | 1.066842  |
| H          | -2.731532 | -0.360762 | 2.334554  | H          | -4.579305 | 0.350314  | -0.009403 |
| H          | -4.193952 | -0.569114 | 1.38221   | H          | -3.600417 | 0.292311  | -1.46984  |
| H          | -3.259099 | 1.749406  | 1.625413  | H          | -2.644122 | 1.320699  | 1.264397  |
| H          | 4.811805  | 0.53273   | -0.519509 | H          | 3.005216  | -1.93614  | -2.005156 |
| H          | 4.099254  | -0.883163 | -1.277998 | H          | 4.421956  | -0.972371 | -1.615027 |
| H          | 4.353799  | -1.401779 | 1.135922  | H          | 3.994579  | -1.080643 | 0.781079  |

|            |           |           |           |            |           |           |           |
|------------|-----------|-----------|-----------|------------|-----------|-----------|-----------|
| H          | 3.630973  | 0.12749   | 1.591444  | H          | 3.689731  | -2.709984 | 0.209004  |
| H          | -2.532213 | -0.809099 | -1.25751  | H          | -4.920508 | -1.949269 | -0.20575  |
| H          | -3.802282 | 2.478893  | -0.706815 | H          | -2.684585 | 3.538679  | 0.187457  |
| H          | -5.019444 | 1.469275  | 0.085527  | H          | -3.3535   | 2.835679  | -1.3058   |
| H          | -3.993317 | 0.782     | -1.181364 | H          | -4.319459 | 2.849114  | 0.183056  |
| H          | -1.363453 | -2.379596 | -1.496538 | H          | -0.022353 | -2.591698 | 1.92389   |
| H          | 1.295798  | 4.194832  | 0.296669  | H          | 3.26711   | 2.667696  | 1.563553  |
| H          | -0.162505 | 3.406565  | 0.967773  | H          | 1.686707  | 3.433708  | 1.261005  |
| H          | 1.399789  | 3.29495   | 1.809147  | H          | 3.063863  | 3.684931  | 0.137374  |
| <b>1-c</b> |           |           |           | <b>1-d</b> |           |           |           |
| C          | 2.149814  | -1.846565 | 0.372449  | C          | -0.215439 | 2.602982  | 0.15316   |
| C          | 0.928284  | -1.698764 | 1.308642  | C          | 0.673447  | 1.932474  | 1.221991  |
| C          | 2.607196  | -0.777735 | -0.633494 | C          | -1.067791 | 1.714804  | -0.748215 |
| C          | 3.223045  | 0.487497  | -0.003432 | C          | -2.33992  | 1.1755    | -0.06072  |
| C          | 2.346493  | 1.716671  | -0.212155 | C          | -2.782676 | -0.226247 | -0.5263   |
| O          | 1.037817  | 1.306327  | 0.257602  | O          | -2.540566 | -1.216569 | 0.510674  |
| C          | -0.051524 | 1.770243  | -0.386365 | C          | -1.340399 | -1.260422 | 1.174191  |
| C          | -1.243176 | 1.041879  | 0.050046  | C          | -0.081288 | -1.211411 | 0.392984  |
| C          | -1.335152 | -0.220781 | 0.917233  | C          | 1.229313  | -0.698196 | 0.984248  |
| C          | -0.531779 | -1.564734 | 0.751158  | C          | 1.66926   | 0.810773  | 0.797605  |
| C          | -2.846294 | -0.521817 | 0.721216  | C          | 2.227781  | -1.688425 | 0.324876  |
| C          | -3.173798 | -1.332924 | -0.547207 | C          | 3.562845  | -1.118563 | -0.119028 |
| C          | -2.293955 | -2.578303 | -0.756771 | C          | 3.344669  | 0.064366  | -1.060875 |
| C          | -0.82562  | -2.208008 | -0.602079 | C          | 2.456499  | 1.152136  | -0.472203 |
| O          | -3.455216 | 0.784149  | 0.527848  | O          | 1.53672   | -2.196264 | -0.86399  |
| C          | -2.491353 | 1.572135  | -0.027973 | C          | 0.199781  | -2.036889 | -0.642597 |
| O          | -0.011744 | -2.406401 | -1.485451 | O          | 2.469795  | 2.27242   | -0.950314 |
| O          | 3.635483  | -1.352751 | -1.45456  | O          | -1.409646 | 2.52203   | -1.883947 |
| C          | 2.805877  | 2.957804  | 0.540154  | C          | -4.274269 | -0.330959 | -0.816853 |
| O          | -0.016754 | 2.671996  | -1.211118 | O          | -1.341838 | -1.452883 | 2.368774  |
| H          | -3.301819 | -0.963003 | 1.611933  | H          | 2.373319  | -2.55588  | 0.980483  |
| H          | -1.15166  | 0.073434  | 1.956947  | H          | 1.19594   | -0.861625 | 2.062378  |
| H          | -1.102299 | -2.195717 | 1.449506  | H          | 2.473664  | 0.885942  | 1.550434  |
| O          | 1.076052  | -0.702807 | 2.317625  | O          | -0.06957  | 1.374701  | 2.309311  |
| C          | -2.988298 | 2.864236  | -0.572371 | C          | -0.669766 | -2.856855 | -1.53412  |
| H          | 3.007578  | -2.059713 | 1.029349  | H          | 0.439134  | 3.185651  | -0.495112 |
| H          | 1.978778  | -2.764899 | -0.196626 | H          | -0.866578 | 3.320056  | 0.674758  |
| H          | 0.907516  | -2.684369 | 1.805978  | H          | 1.305999  | 2.750437  | 1.598449  |
| H          | 1.755877  | -0.499226 | -1.265312 | H          | -0.452428 | 0.867779  | -1.082429 |

|   |           |           |           |   |           |           |           |
|---|-----------|-----------|-----------|---|-----------|-----------|-----------|
| H | 4.197409  | 0.658808  | -0.471338 | H | -2.199306 | 1.140838  | 1.022614  |
| H | 3.39425   | 0.347244  | 1.069732  | H | -3.132891 | 1.908194  | -0.249821 |
| H | 2.256406  | 1.944558  | -1.279248 | H | -2.220261 | -0.513634 | -1.426089 |
| H | -4.23353  | -1.606243 | -0.536591 | H | 4.130339  | -0.81547  | 0.769686  |
| H | -3.026849 | -0.667189 | -1.403661 | H | 4.146048  | -1.902214 | -0.613256 |
| H | -2.451466 | -3.004378 | -1.750403 | H | 4.281907  | 0.534893  | -1.371667 |
| H | -2.535023 | -3.350383 | -0.013326 | H | 2.853092  | -0.289051 | -1.975792 |
| H | 3.221983  | -2.058049 | -1.971125 | H | -1.87116  | 1.959971  | -2.520282 |
| H | 2.135535  | 3.795449  | 0.333531  | H | -4.546729 | -1.352951 | -1.09446  |
| H | 2.817892  | 2.77176   | 1.618801  | H | -4.853912 | -0.049678 | 0.067092  |
| H | 3.816495  | 3.238677  | 0.225769  | H | -4.546482 | 0.338993  | -1.638752 |
| H | 1.898813  | -0.888992 | 2.788238  | H | -0.58483  | 2.083342  | 2.716189  |
| H | -3.662299 | 2.67699   | -1.416123 | H | -0.325071 | -3.895617 | -1.531567 |
| H | -2.157286 | 3.479718  | -0.911003 | H | -0.602559 | -2.497841 | -2.568014 |
| H | -3.569966 | 3.386414  | 0.195093  | H | -1.708674 | -2.820022 | -1.207781 |

Figure S15. HRESIMS spectrum of compound 2

User Spectra

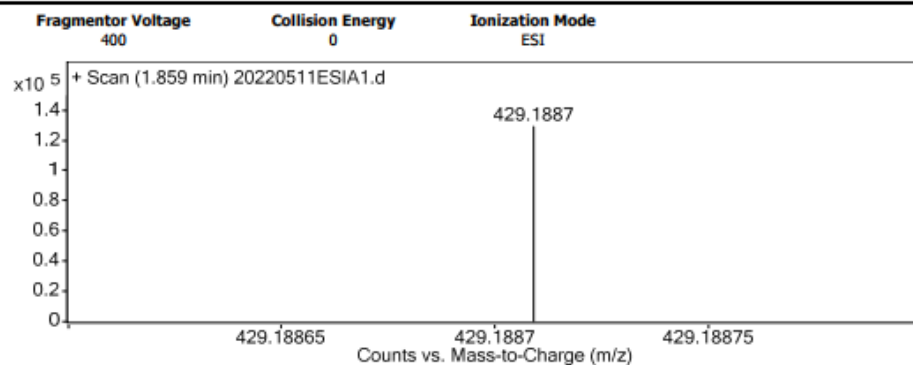

Peak List

| m/z      | z | Abund     | Formula                                          | Ion |
|----------|---|-----------|--------------------------------------------------|-----|
| 105.0432 | 1 | 45039.14  |                                                  |     |
| 429.1887 | 1 | 129073.71 | C <sub>22</sub> H <sub>30</sub> NaO <sub>7</sub> | M+  |
| 430.1921 | 1 | 34491.77  | C <sub>22</sub> H <sub>30</sub> NaO <sub>7</sub> | M+  |
| 445.1629 | 1 | 46338.15  |                                                  |     |
| 446.1668 | 1 | 13698.38  |                                                  |     |
| 835.3862 | 1 | 41398.34  |                                                  |     |
| 836.3898 | 1 | 23891.83  |                                                  |     |
| 851.3602 | 1 | 14316.07  |                                                  |     |
| 922.0098 | 1 | 139643.47 |                                                  |     |
| 923.013  | 1 | 24163.64  |                                                  |     |

Formula Calculator Element Limits

| Element | Min | Max |
|---------|-----|-----|
| C       | 0   | 200 |
| H       | 0   | 400 |
| O       | 0   | 10  |
| Na      | 1   | 1   |

Formula Calculator Results

| Formula                                          | CalculatedMass | Mz       | Diff.(mDa) | Diff.(ppm) | DBE |
|--------------------------------------------------|----------------|----------|------------|------------|-----|
| C <sub>22</sub> H <sub>30</sub> NaO <sub>7</sub> | 429.1889       | 429.1887 | 0.2        | 0.5        | 7.5 |

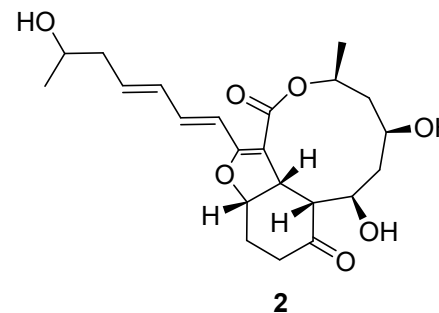

**Figure S16.** IR spectrum of compound **2**

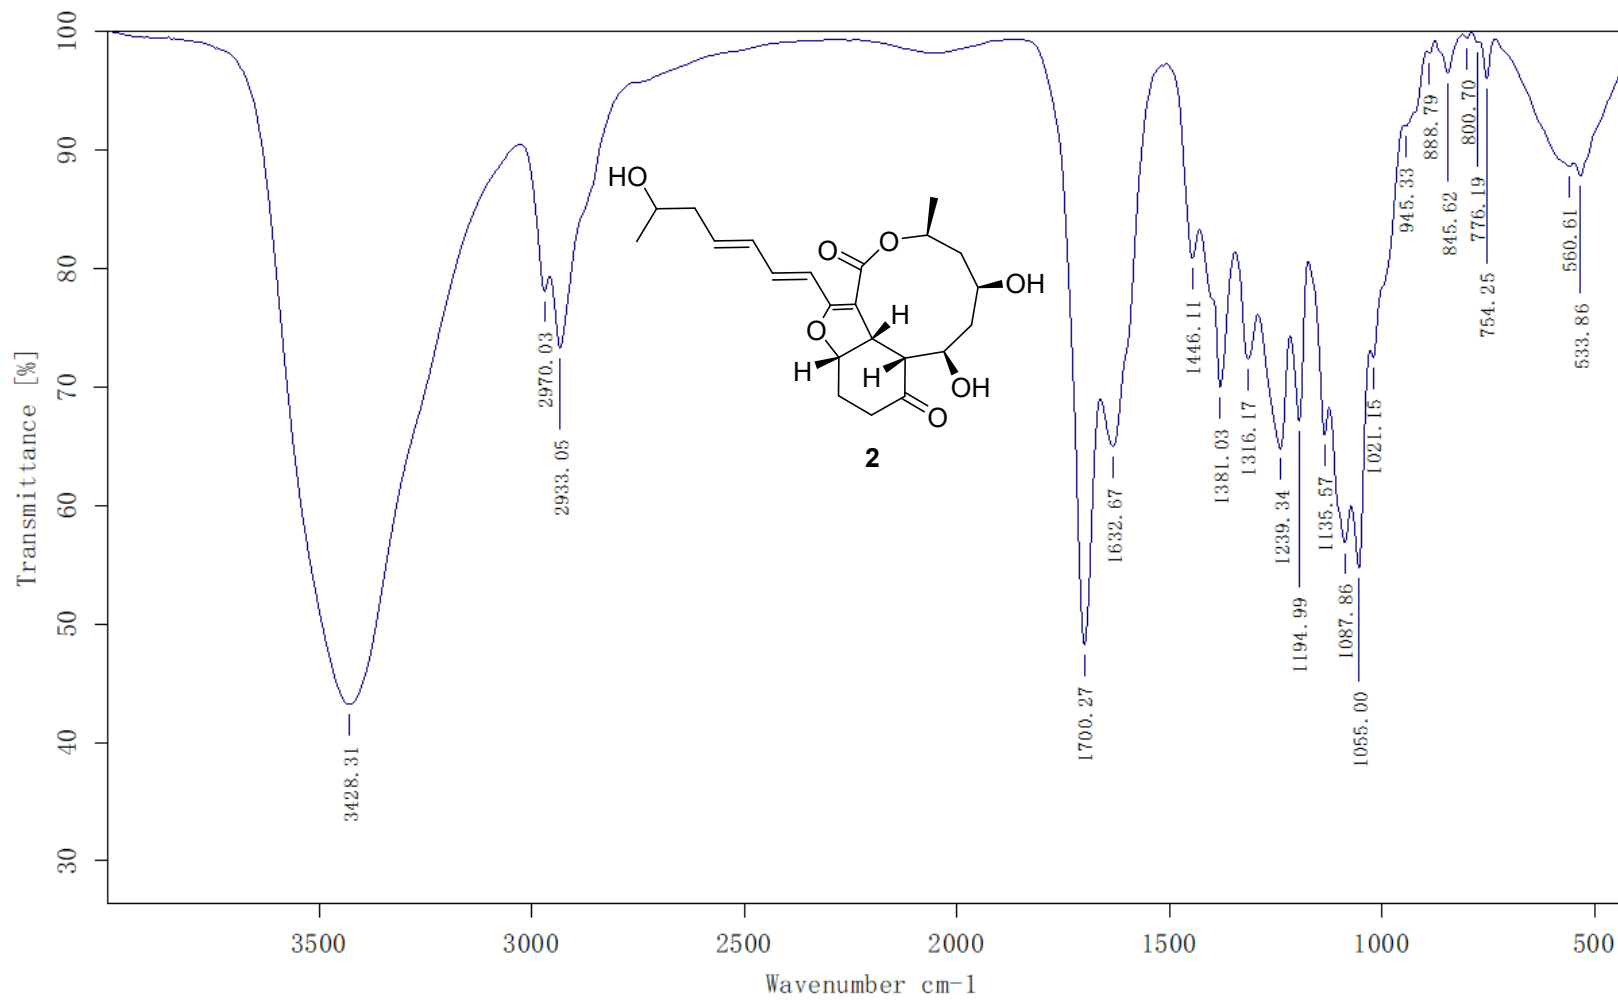

**Figure S17.** Optical rotation spectrum of compound **2**

**Rudolph Research Analytical**

This sample was measured on an Autopol VI, Serial #91058  
 Manufactured by Rudolph Research Analytical, Hackettstown, NJ, USA.

Measurement Date : Thursday, 18-AUG-2022

Set Temperature : 25.0

Time Delay : Disabled

Delay between Measurement : Disabled

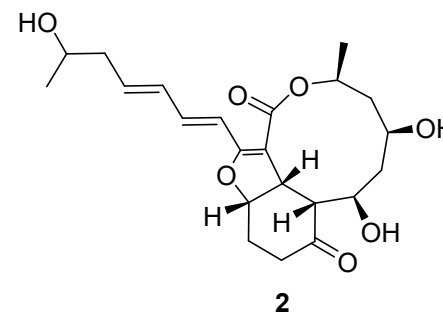

| <u>n</u> | <u>Average</u> | <u>Std.Dev.</u> | <u>% RSD</u> | <u>Maximum</u> | <u>Minimum</u> |
|----------|----------------|-----------------|--------------|----------------|----------------|
| 5        | 96.80          | 0.45            | 0.46         | 97.00          | 96.00          |

| <u>S.No</u> | <u>Sample ID</u> | <u>Time</u> | <u>Result</u> | <u>Scale</u> | <u>OR °Arc</u> | <u>WLG.nm</u> | <u>Lg.mm</u> | <u>Conc.g/100ml</u> | <u>Temp.</u> |
|-------------|------------------|-------------|---------------|--------------|----------------|---------------|--------------|---------------------|--------------|
| 1           | 6A-C-16          | 02:03:59 PM | 97.00         | SR           | 0.097          | 589           | 100.00       | 0.100               | 25.0         |
| 2           | 6A-C-16          | 02:04:05 PM | 96.00         | SR           | 0.096          | 589           | 100.00       | 0.100               | 25.1         |
| 3           | 6A-C-16          | 02:04:12 PM | 97.00         | SR           | 0.097          | 589           | 100.00       | 0.100               | 25.1         |
| 4           | 6A-C-16          | 02:04:18 PM | 97.00         | SR           | 0.097          | 589           | 100.00       | 0.100               | 25.1         |
| 5           | 6A-C-16          | 02:04:24 PM | 97.00         | SR           | 0.097          | 589           | 100.00       | 0.100               | 25.1         |



Figure S18.  $^1\text{H}$  NMR spectrum of compound **2** in  $\text{DMSO-}d_6$  (600 MHz)

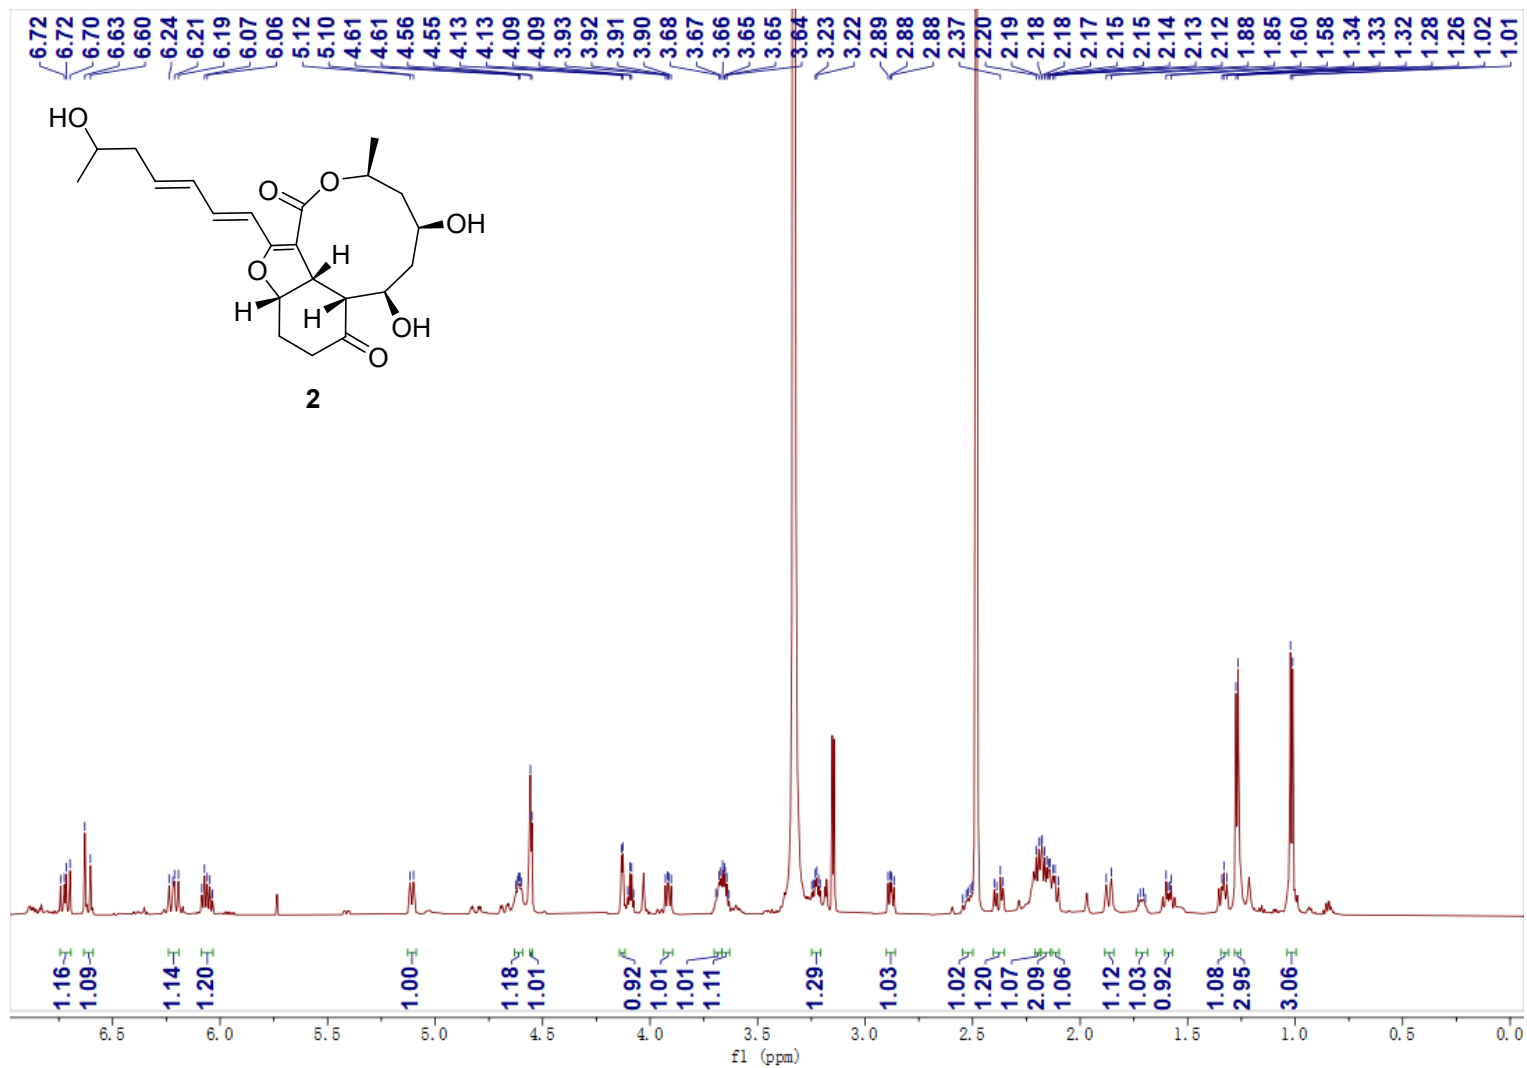

Figure S19.  $^{13}\text{C}$  NMR spectrum of compound **2** in  $\text{DMSO-}d_6$  (150 MHz)

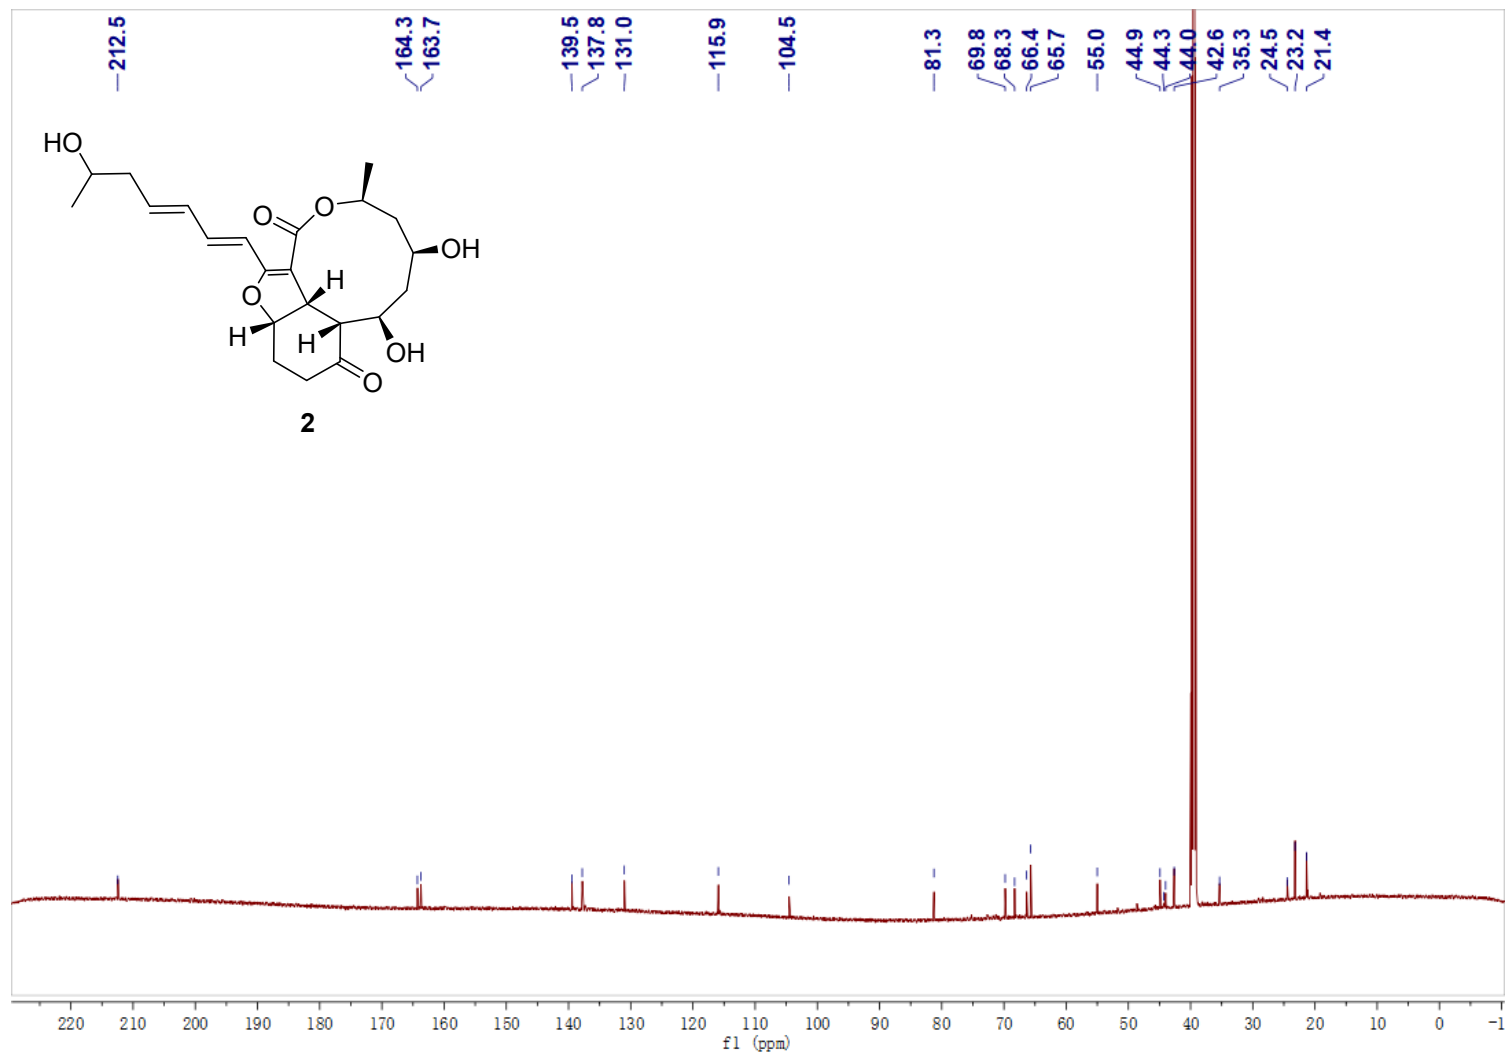

Figure S20. DEPT spectrum of compound **2** in DMSO-*d*<sub>6</sub> (150 MHz)

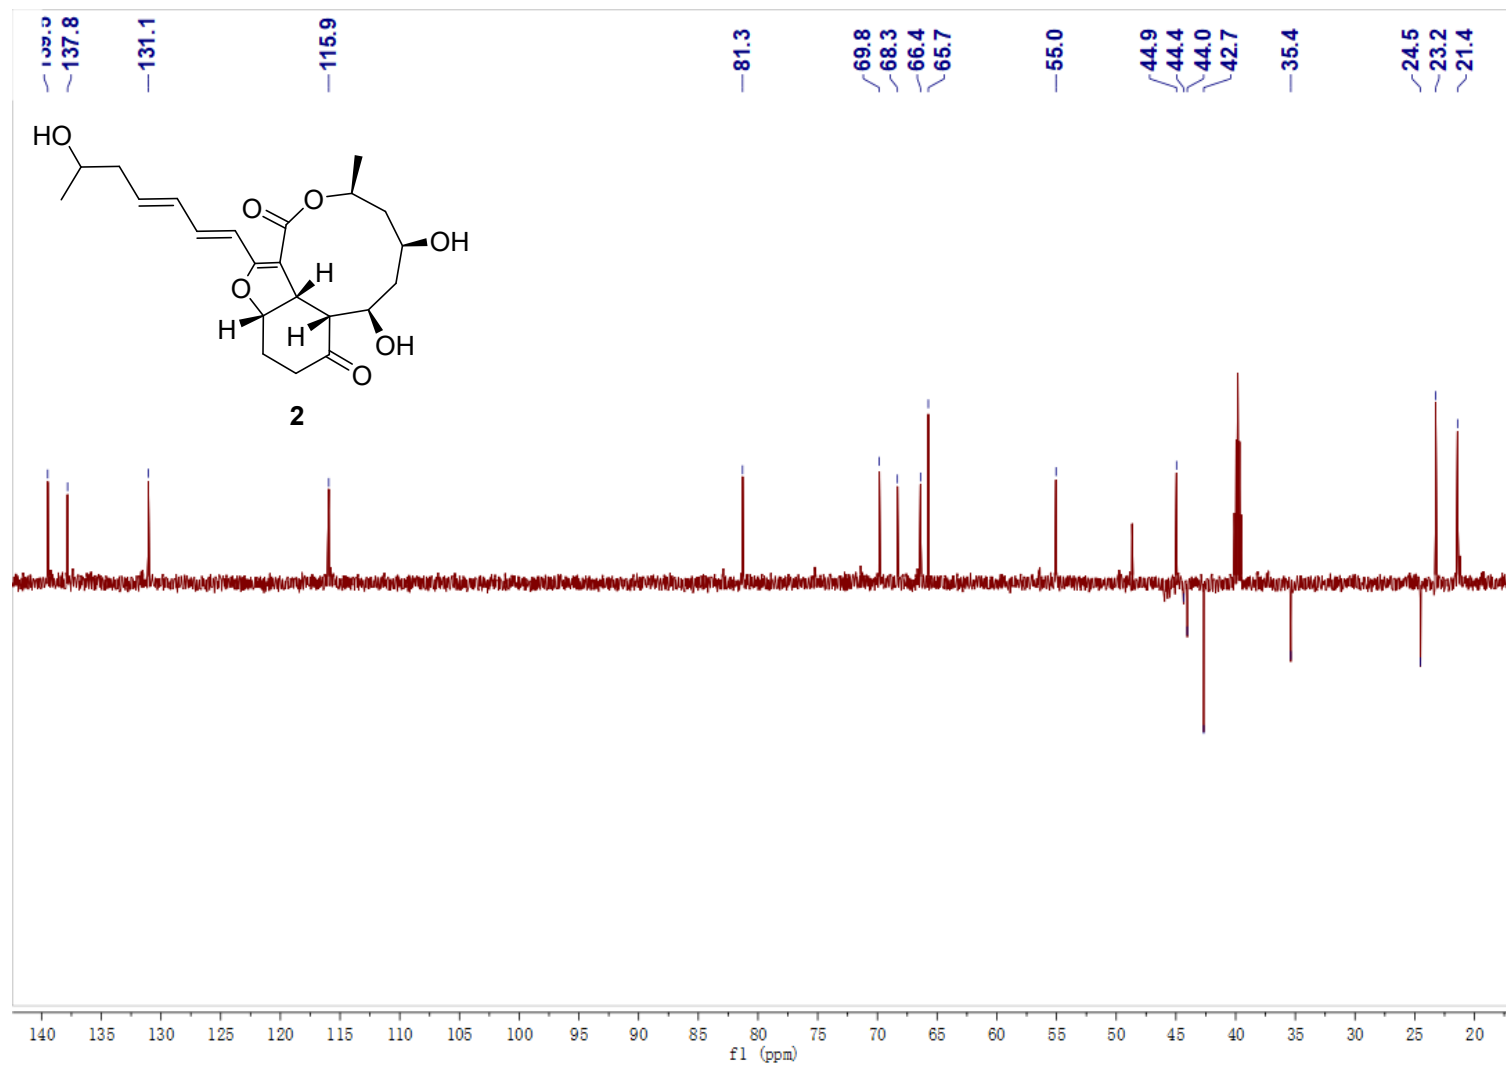

**Figure S21.** (a) Key HMBC (arrow) and  $^1\text{H}$ - $^1\text{H}$  COSY (bold) correlations of **2**; (b) Key ROESY correlations of **2**.

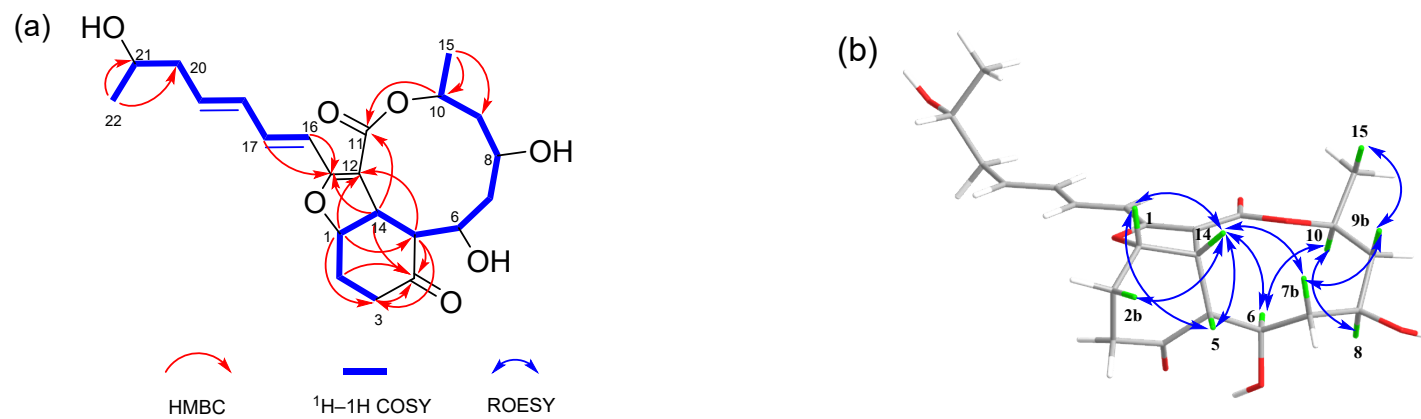

**Figure S22.** HSQC spectrum of compound **2** in DMSO-*d*<sub>6</sub> (600 MHz)

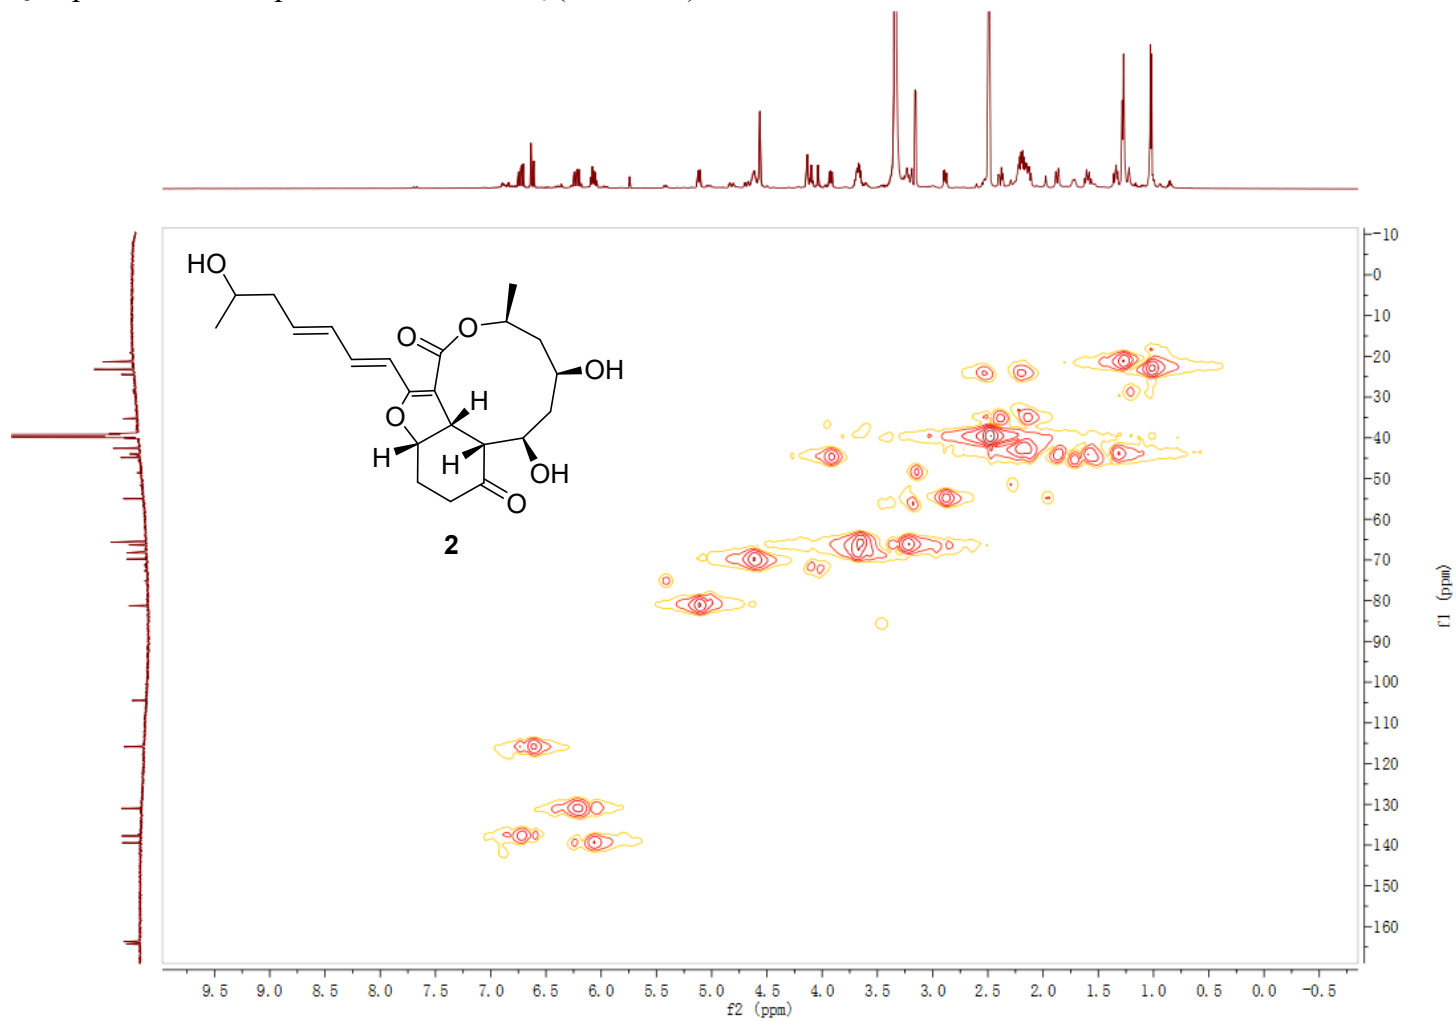

**Figure S23.**  $^1\text{H}$ - $^1\text{H}$  COSY spectrum of compound **2** in  $\text{DMSO-}d_6$  (600 MHz)

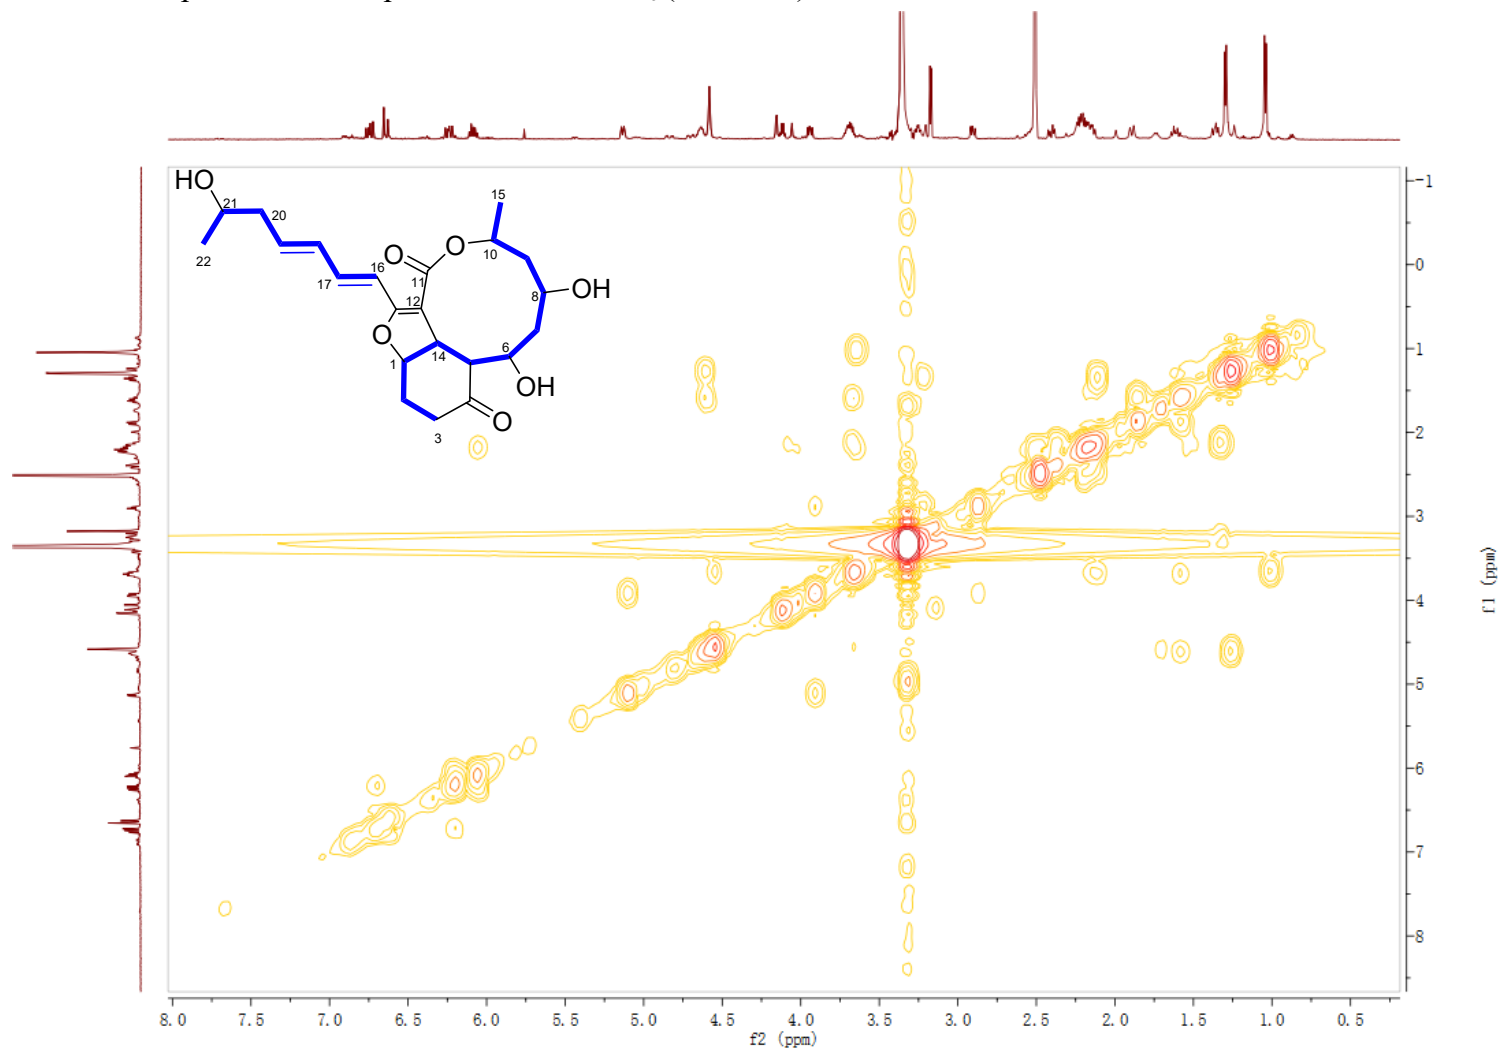

**Figure S24.** HMBC spectrum of compound **2** in DMSO-*d*<sub>6</sub> (600 MHz)

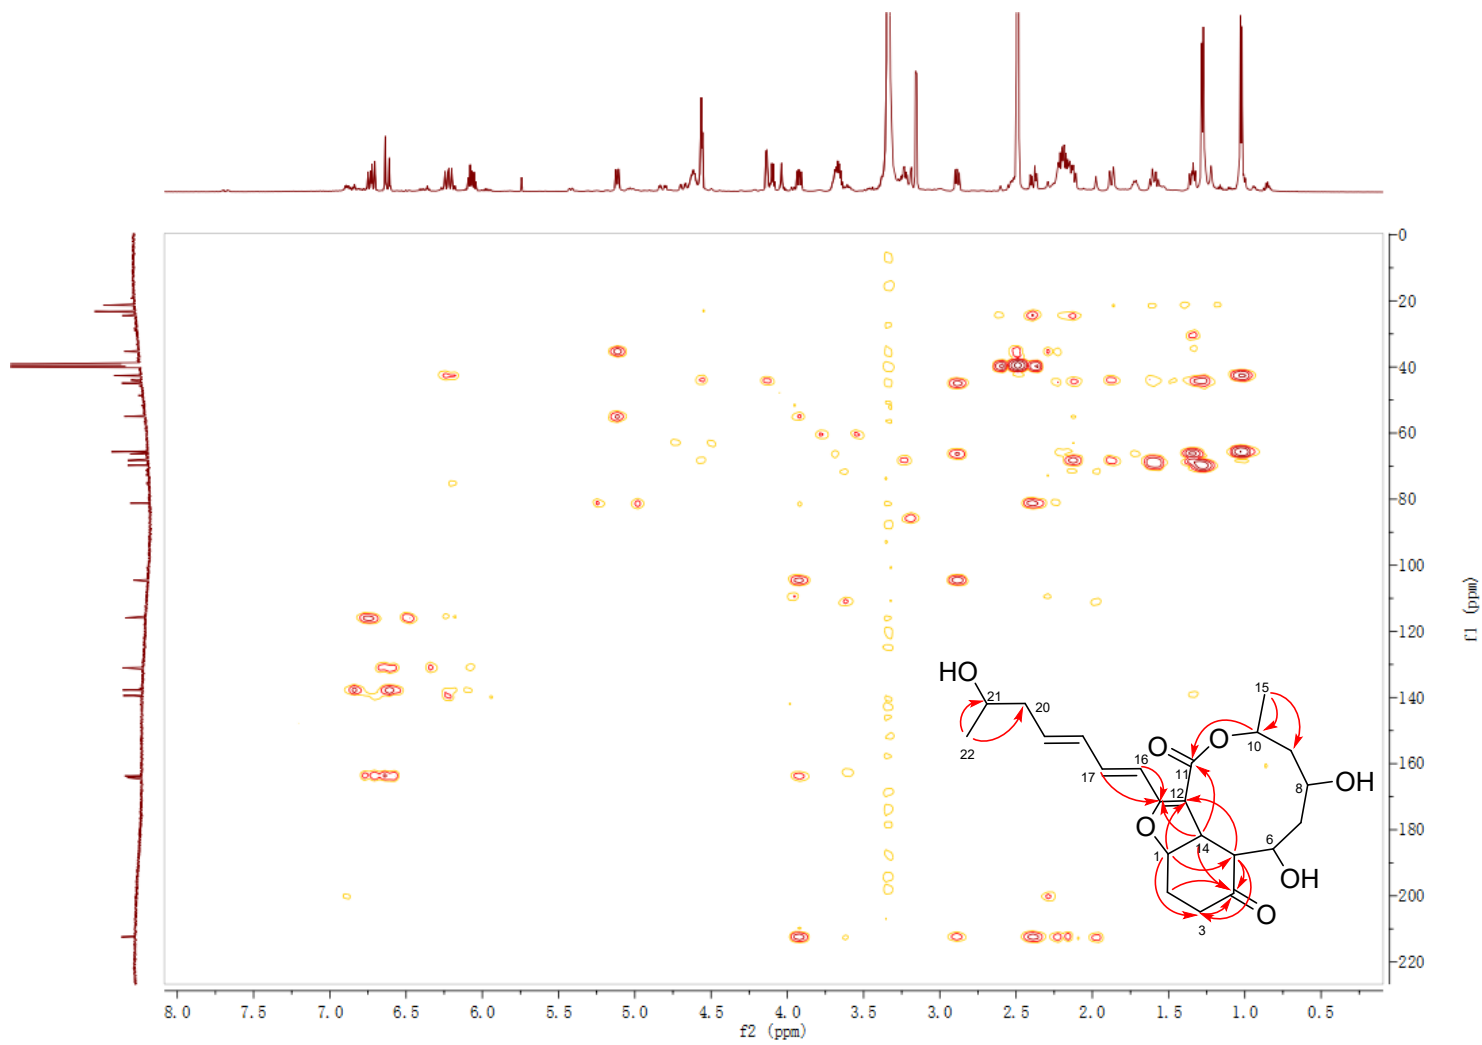

**Figure S25.** ROESY spectrum of compound **2** in DMSO- $d_6$  (600 MHz)

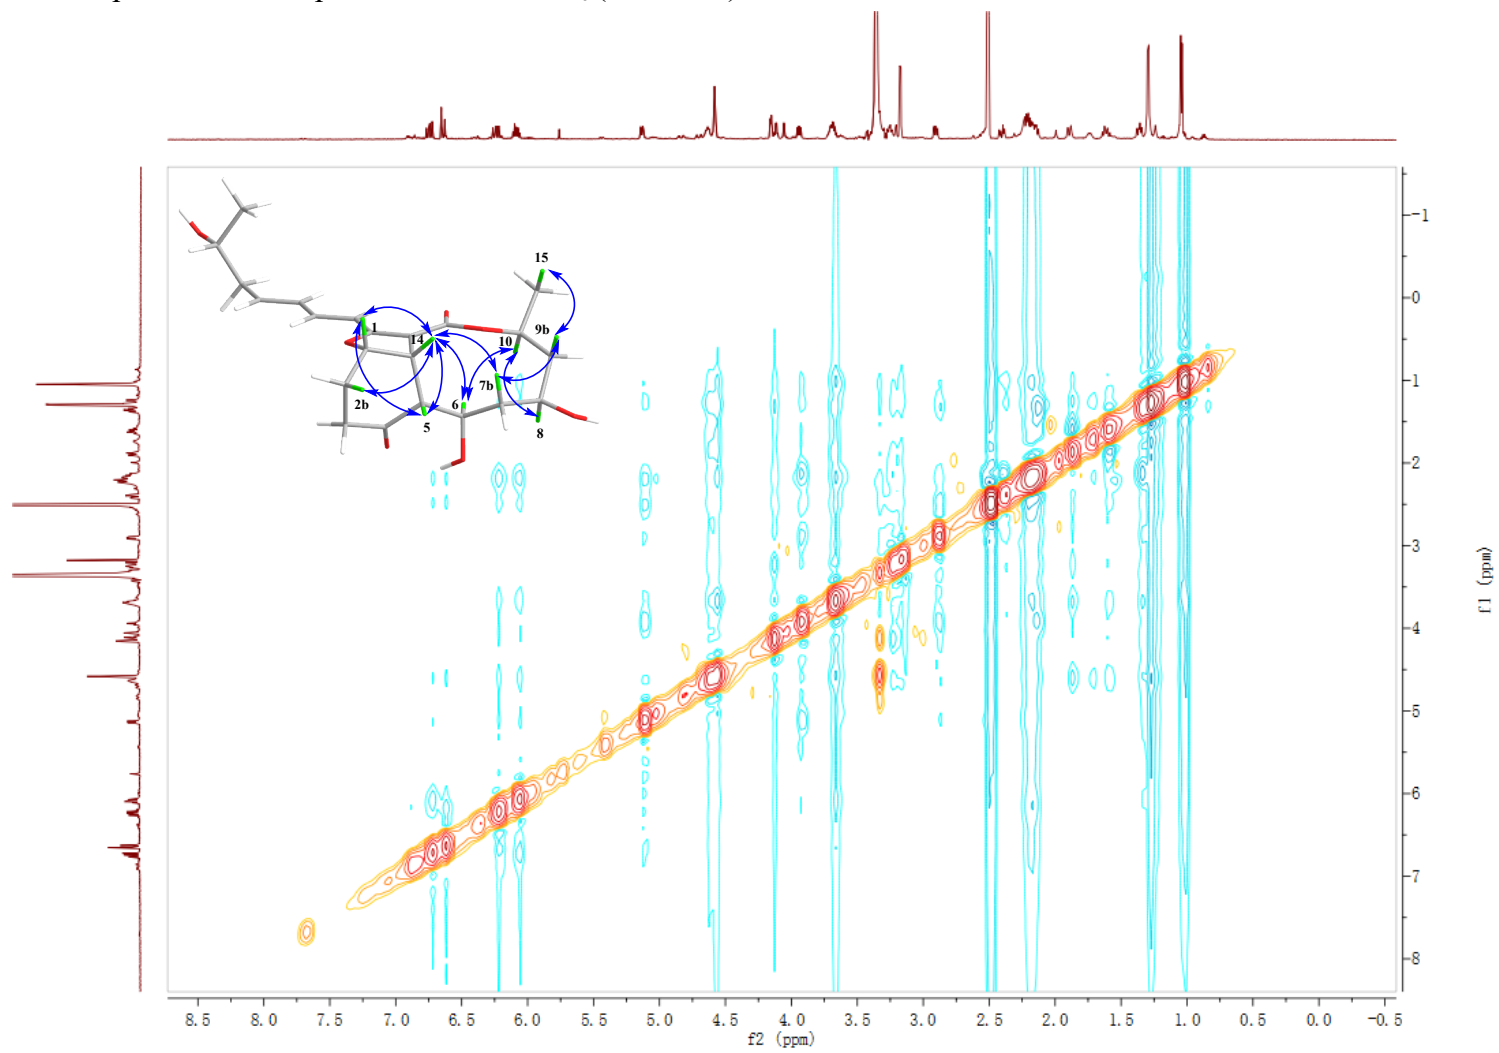



**Figure S26.** ECD curve of compound 2

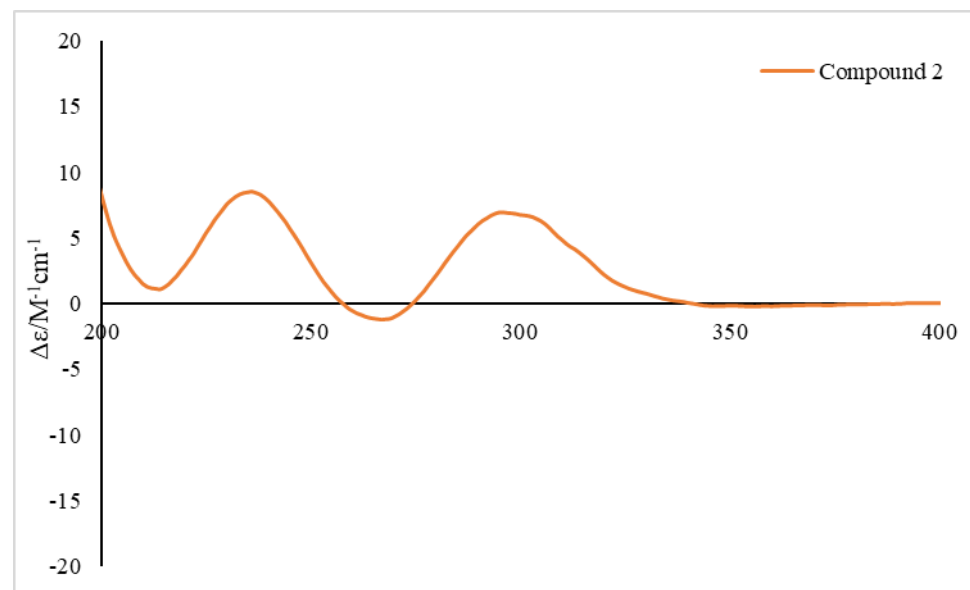

Figure S27.  $^1\text{H}$  NMR spectrum of compound **3** in methanol- $d_4$  (600 MHz)

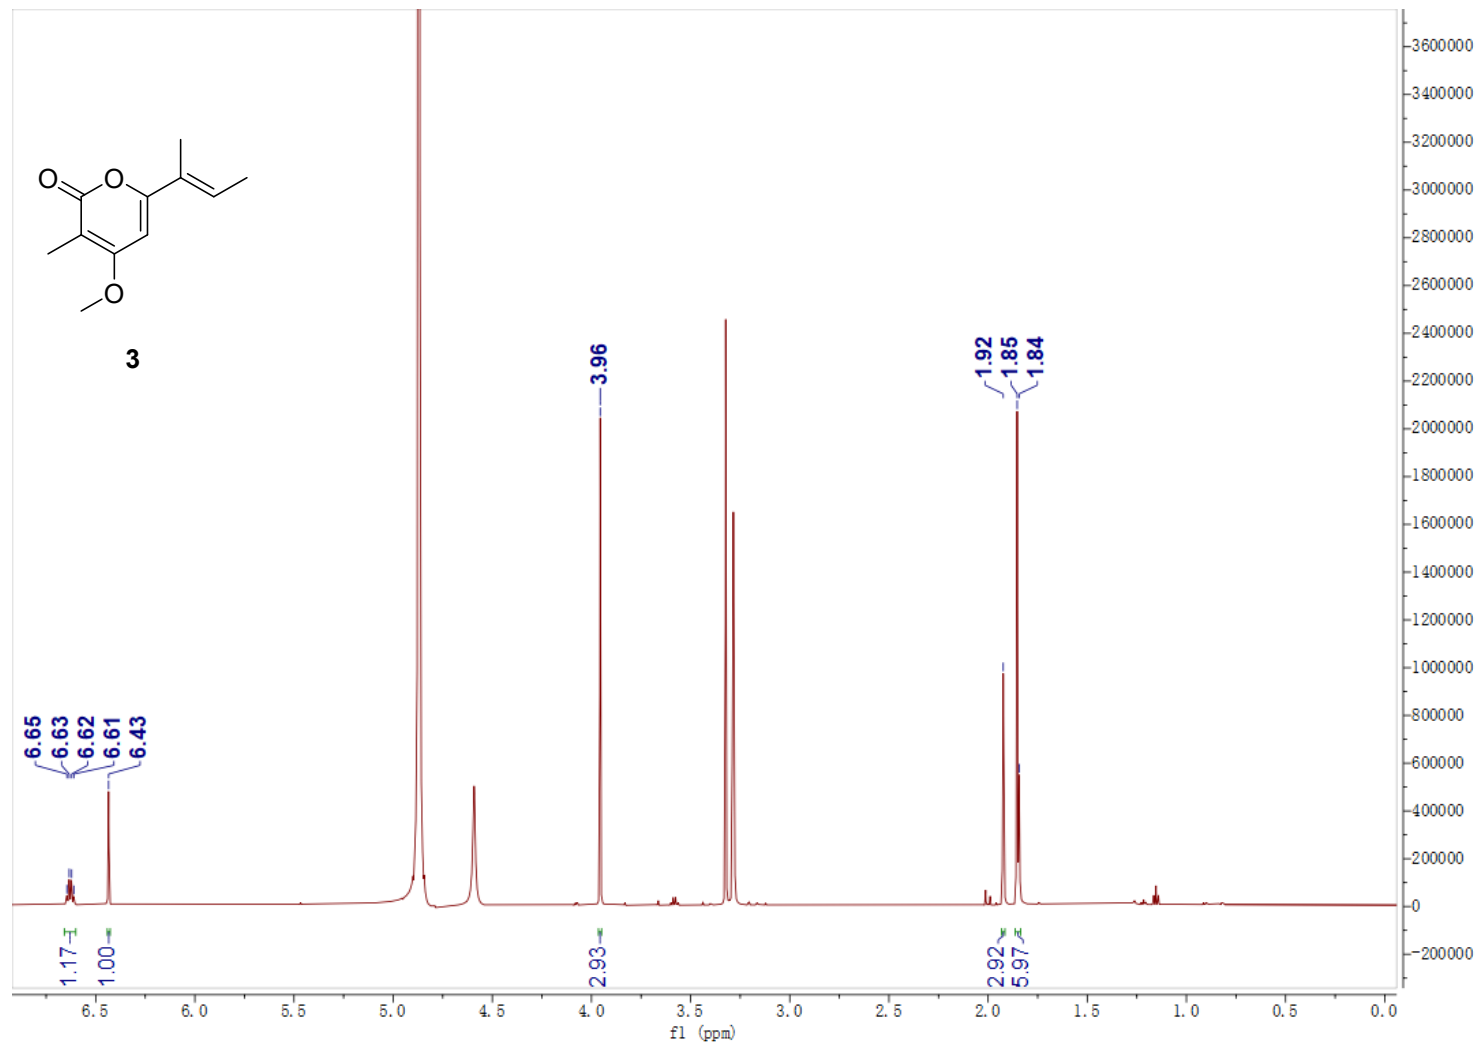

**Figure S28.**  $^{13}\text{C}$  NMR spectrum of compound **3** in methanol- $d_4$  (125 MHz)

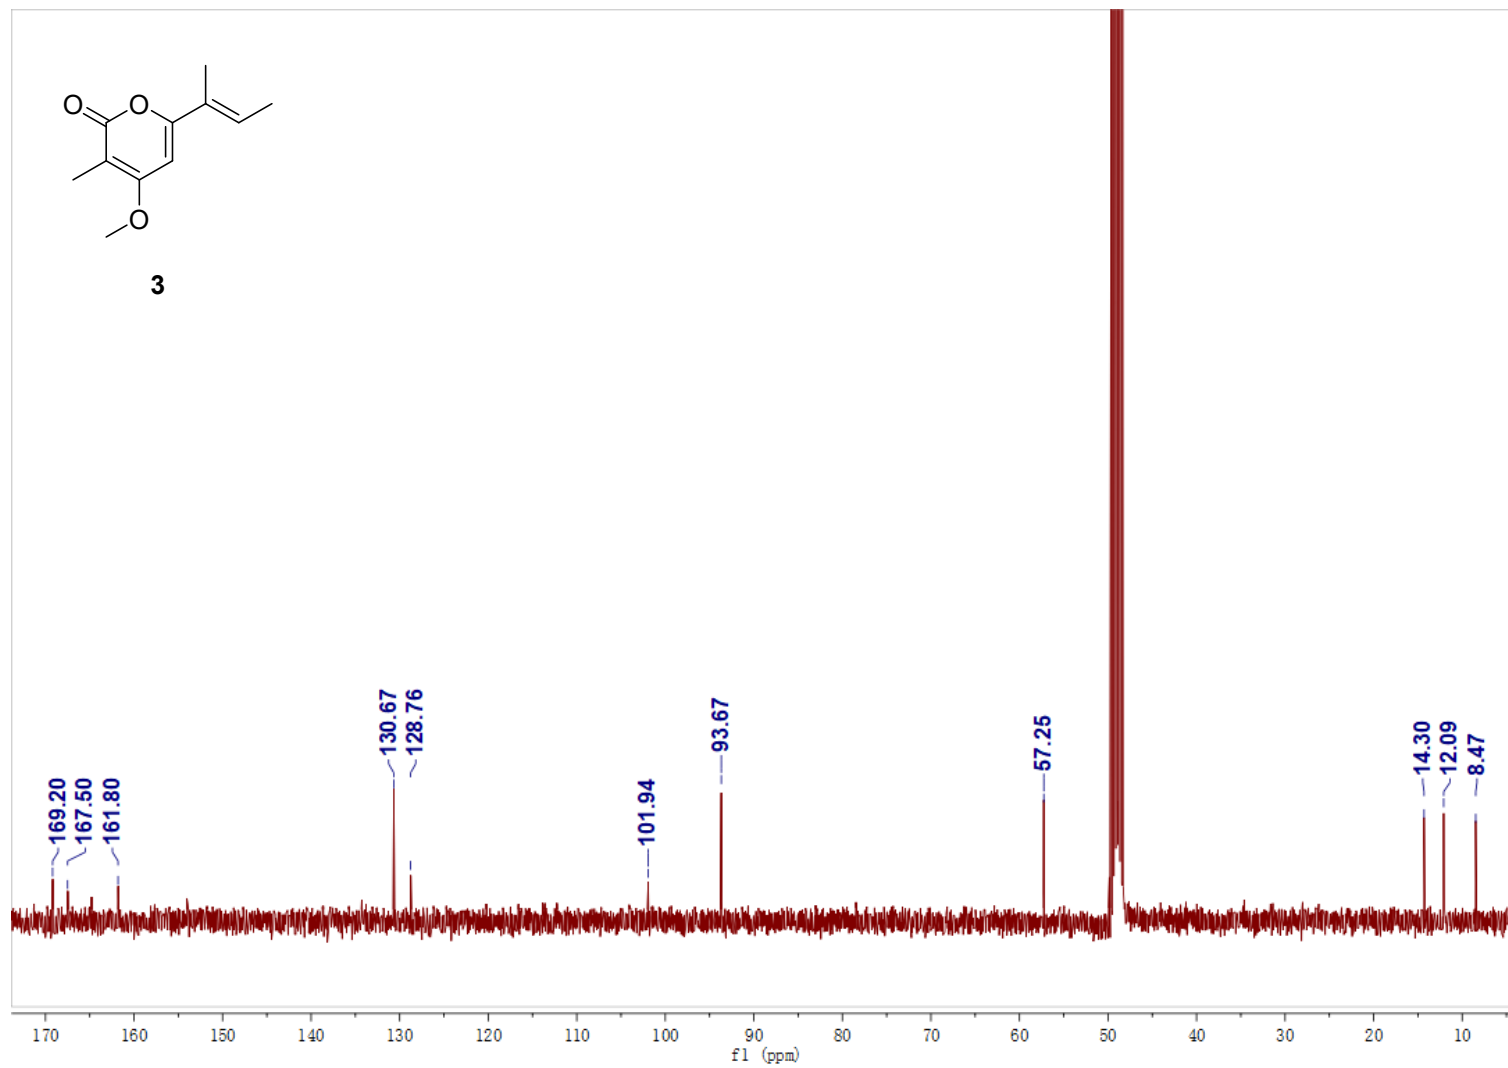

Figure S29.  $^1\text{H}$  NMR spectrum of compound **4** in methanol- $d_4$  (600 MHz)

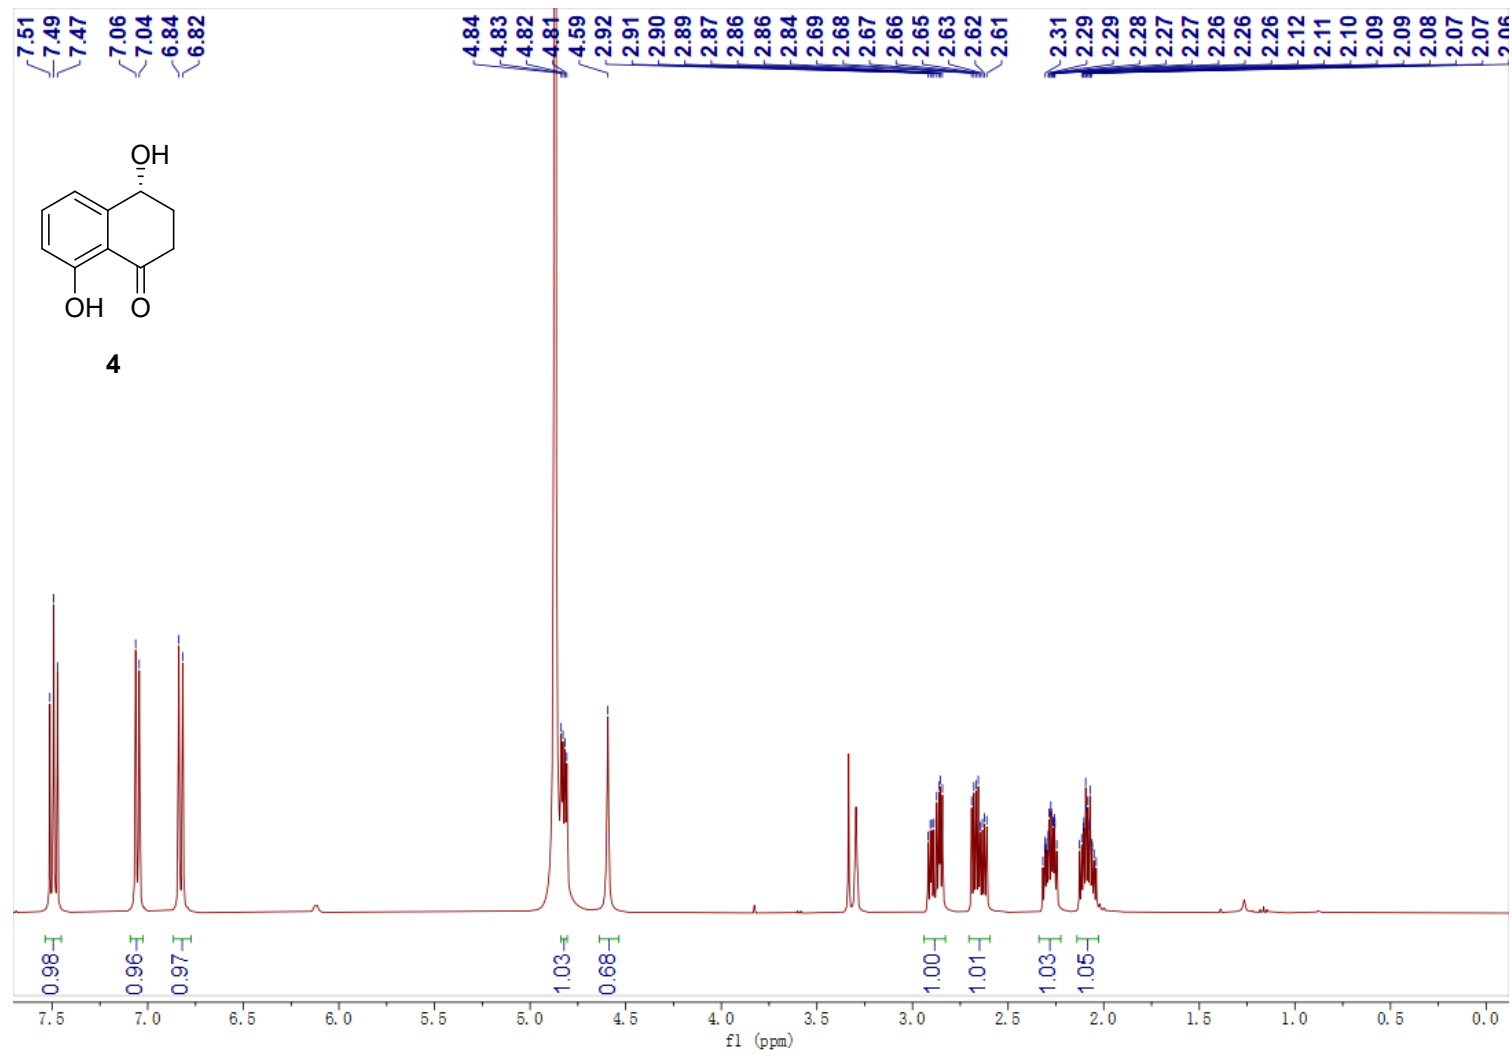

Figure S30.  $^{13}\text{C}$  NMR spectrum of compound 4 in methanol- $d_4$  (125 MHz)

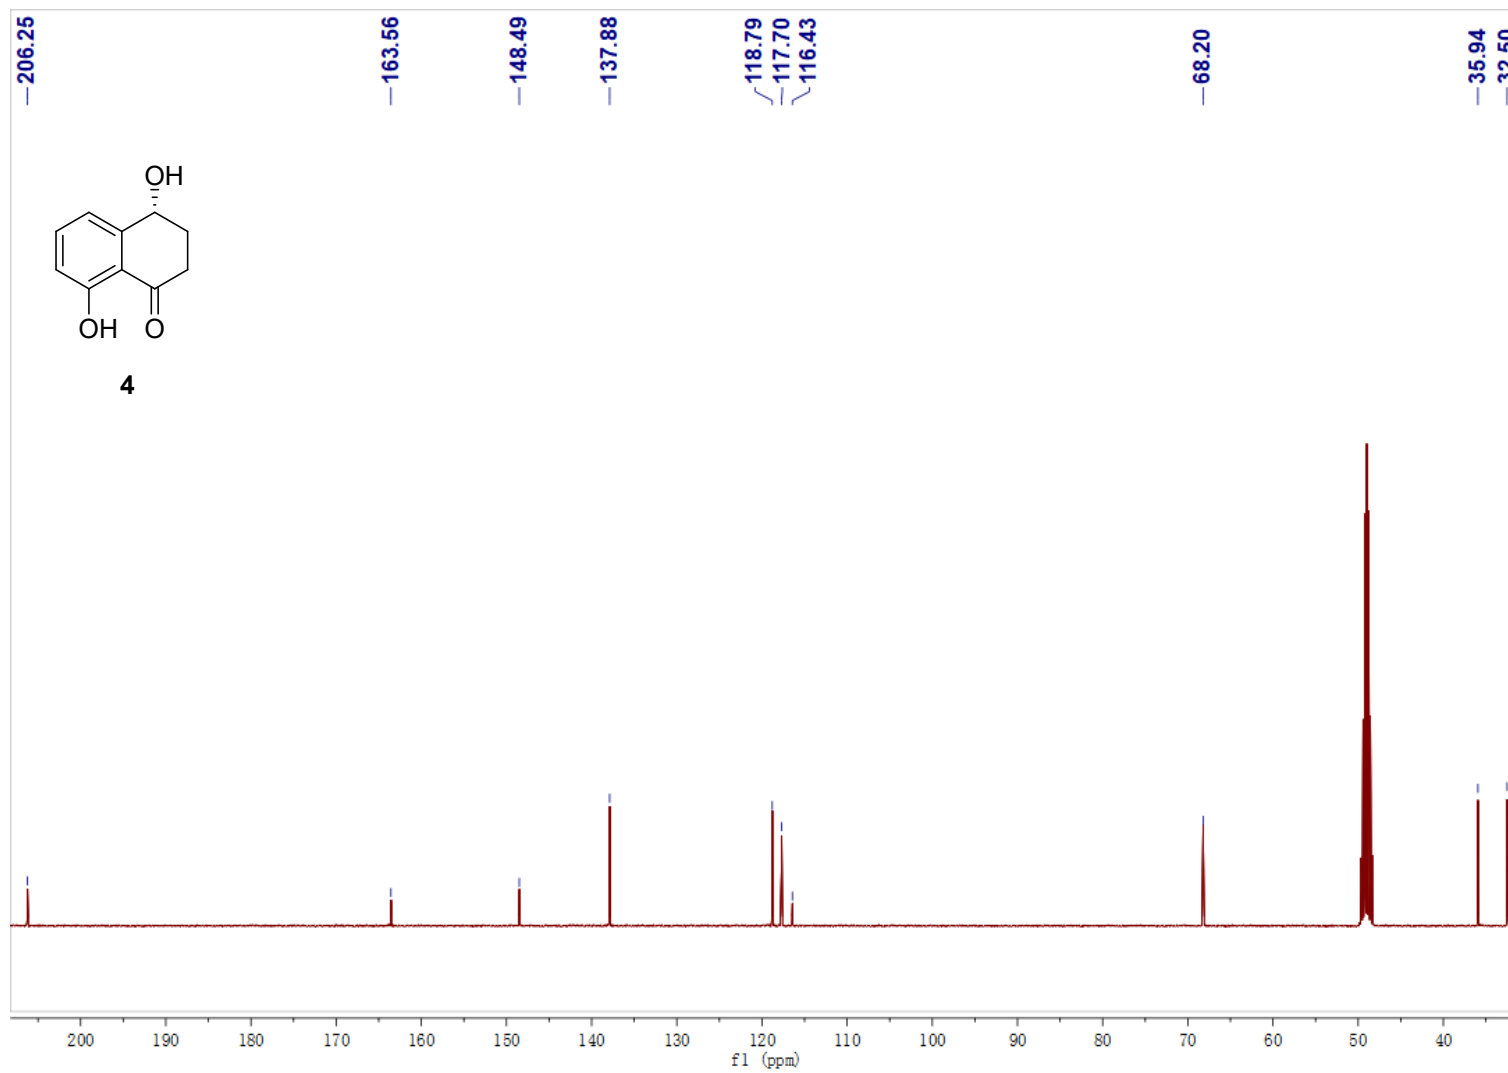

Figure S31.  $^1\text{H}$  NMR spectrum of compound **5** in methanol- $d_4$  (600 MHz)

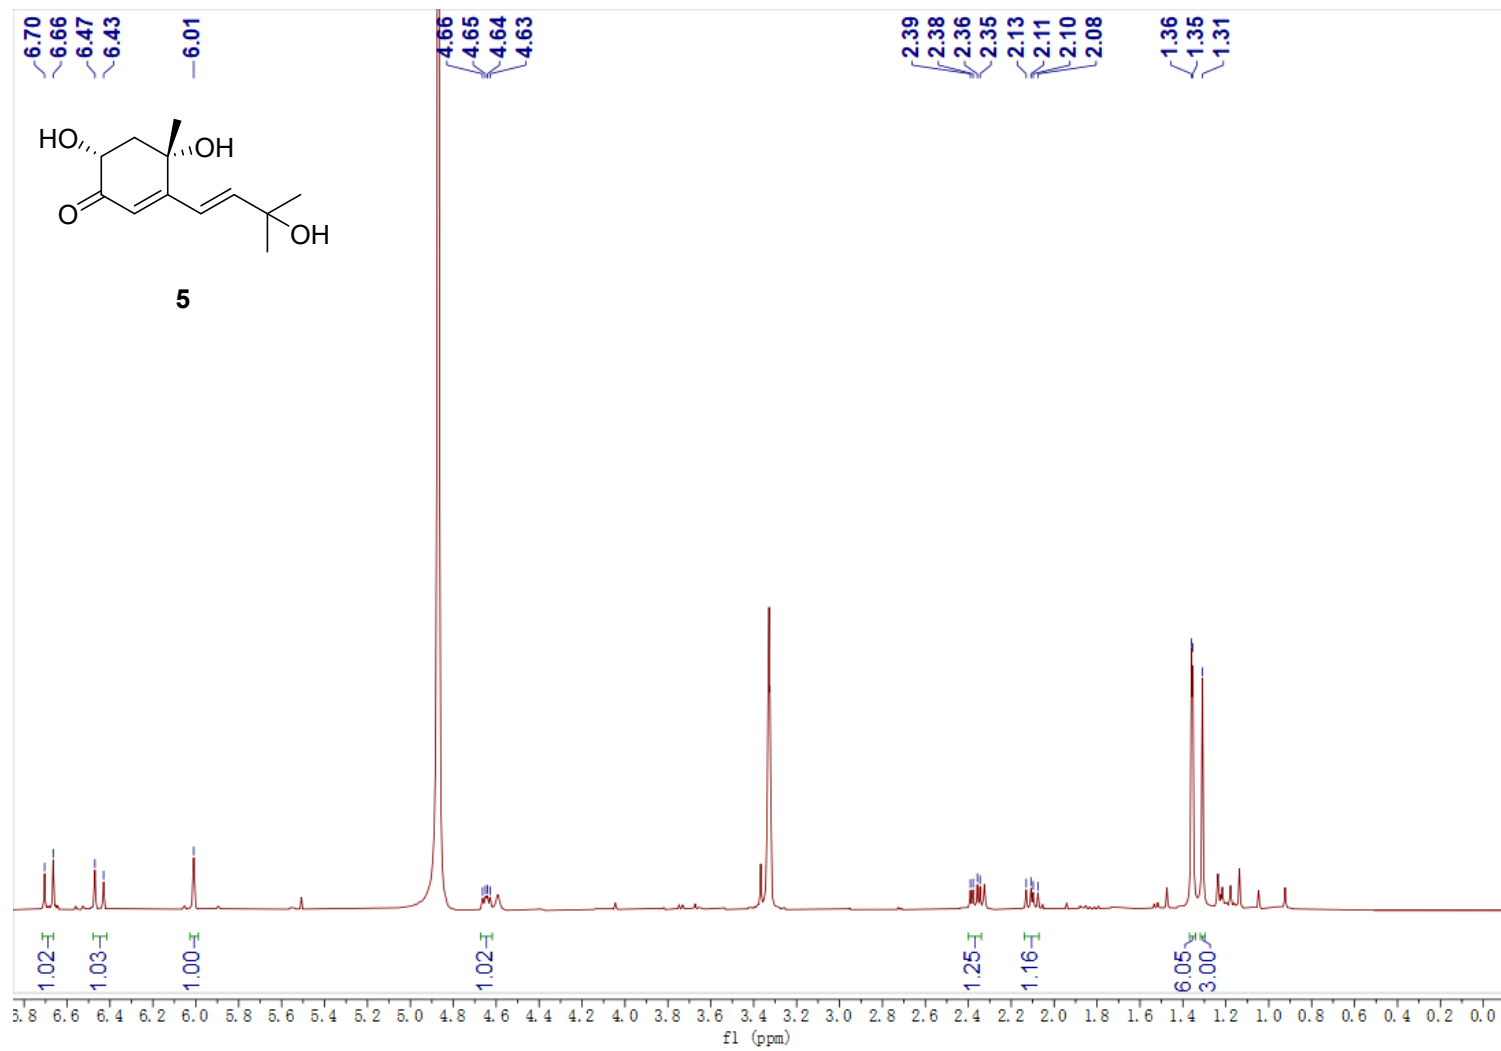

Figure S32.  $^{13}\text{C}$  NMR spectrum of compound **5** in methanol- $d_4$  (125 MHz)

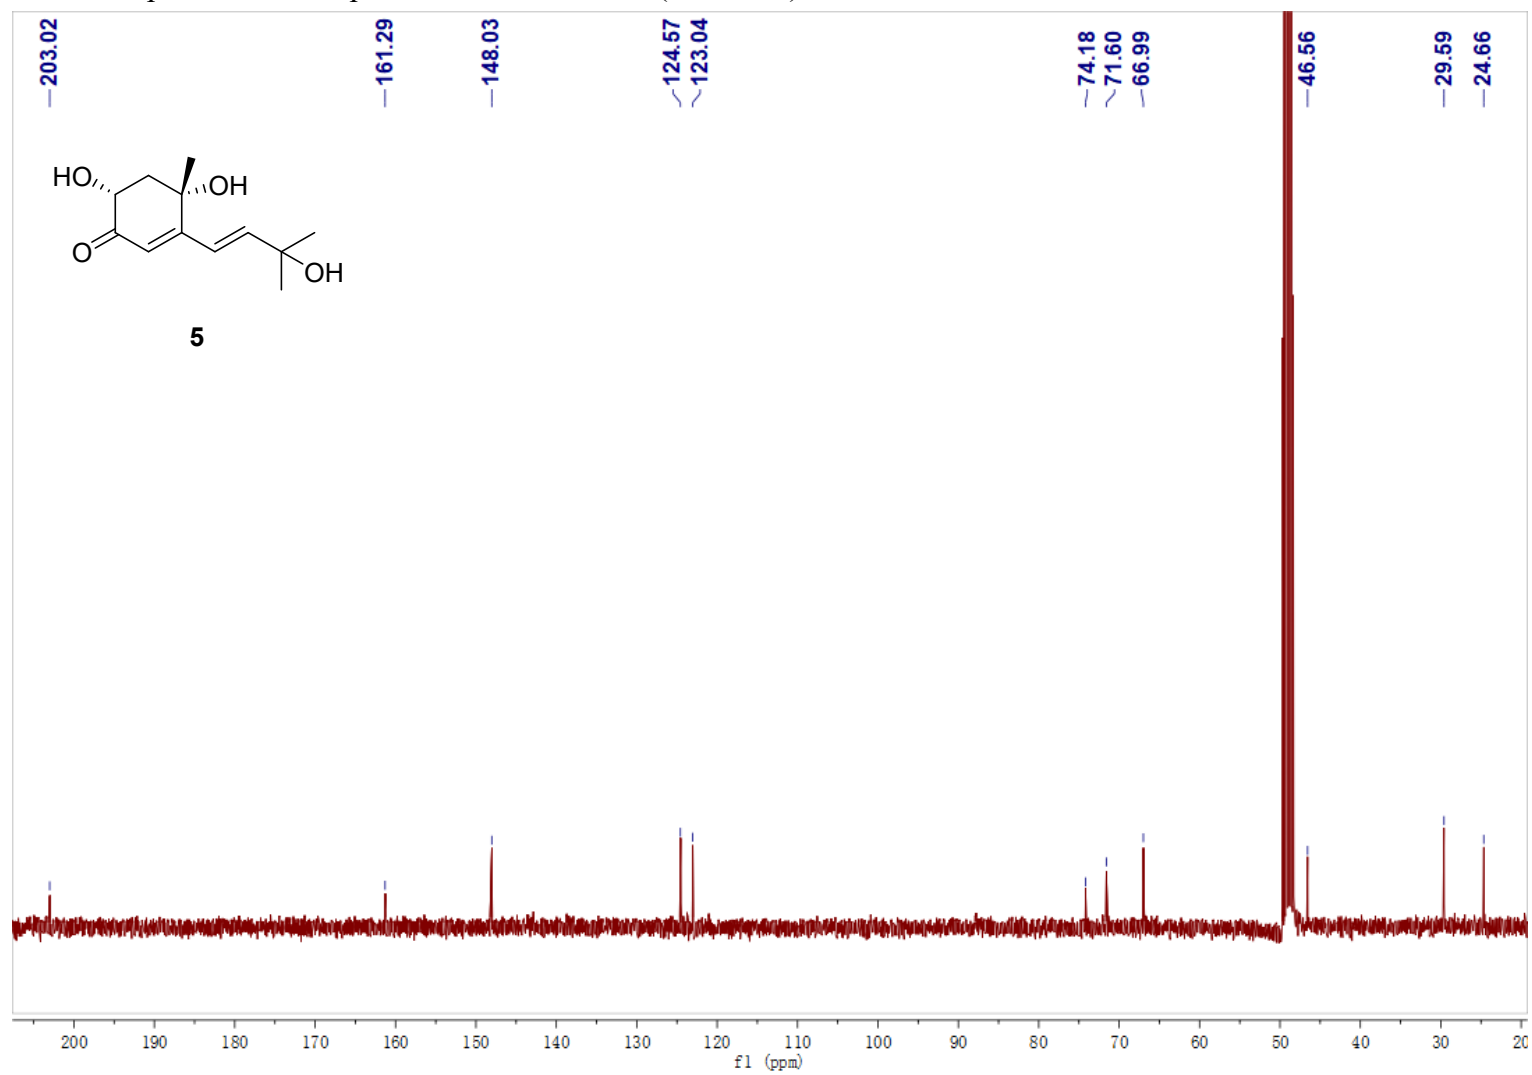

Figure S33.  $^1\text{H}$  NMR spectrum of compound **6** in methanol- $d_4$  (600 MHz)

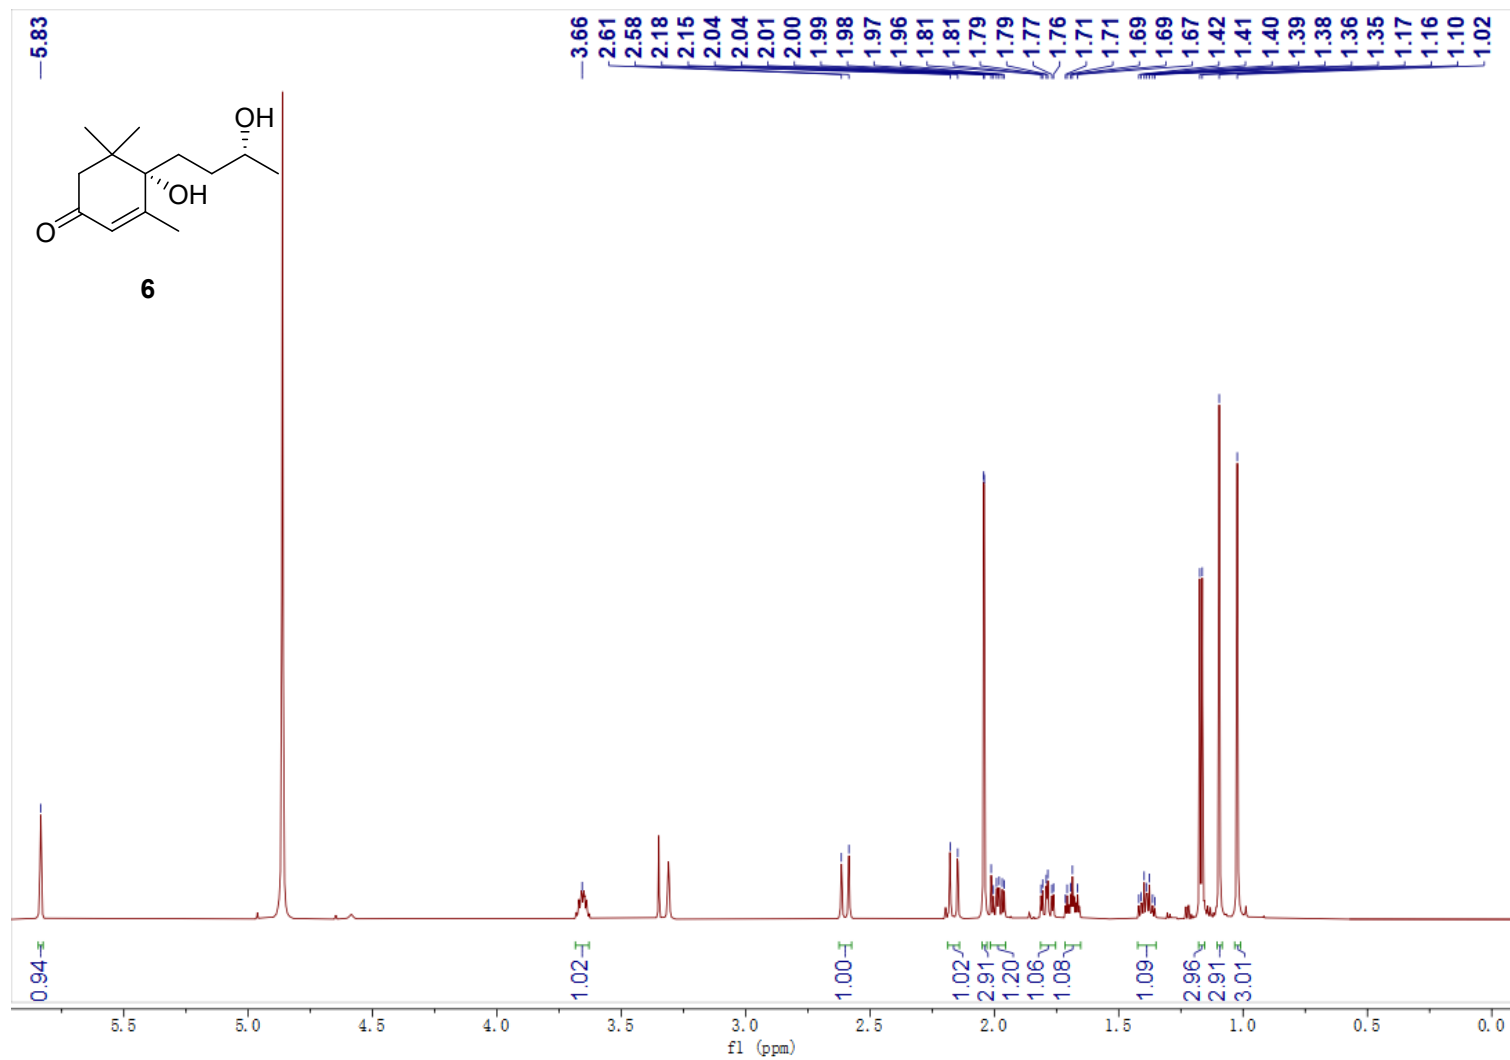



Figure S34.  $^{13}\text{C}$  NMR spectrum of compound **6** in methanol- $d_4$  (125 MHz)

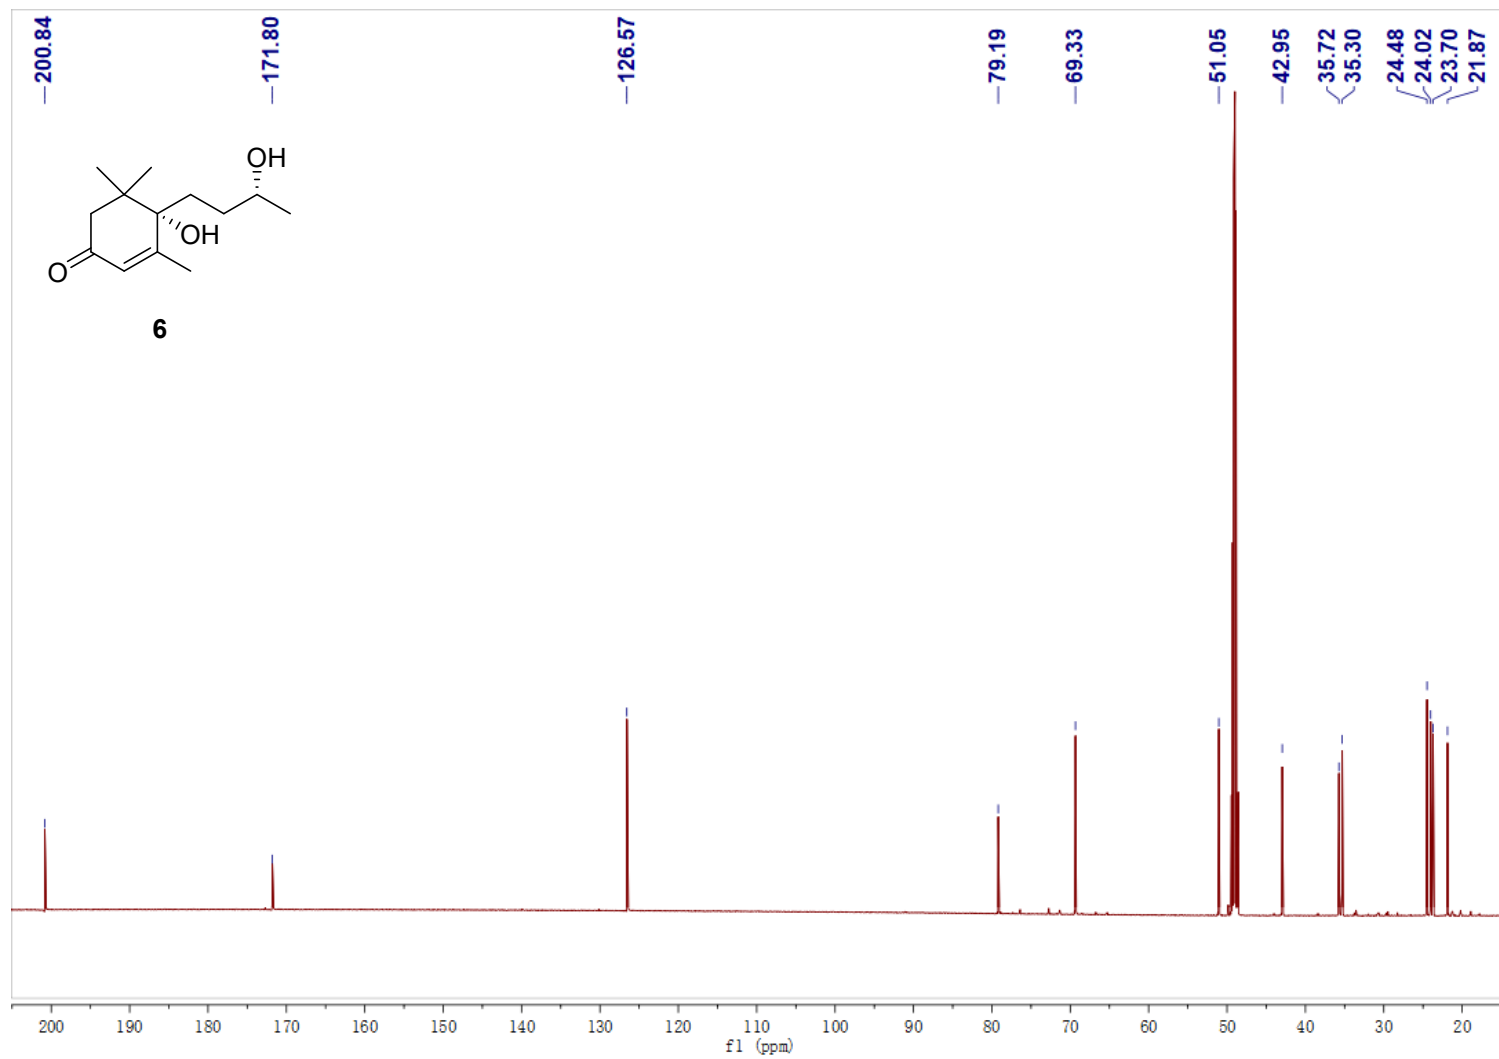

Figure S35. <sup>1</sup>H NMR spectrum of compound 7 in methanol-d<sub>4</sub> (600 MHz)

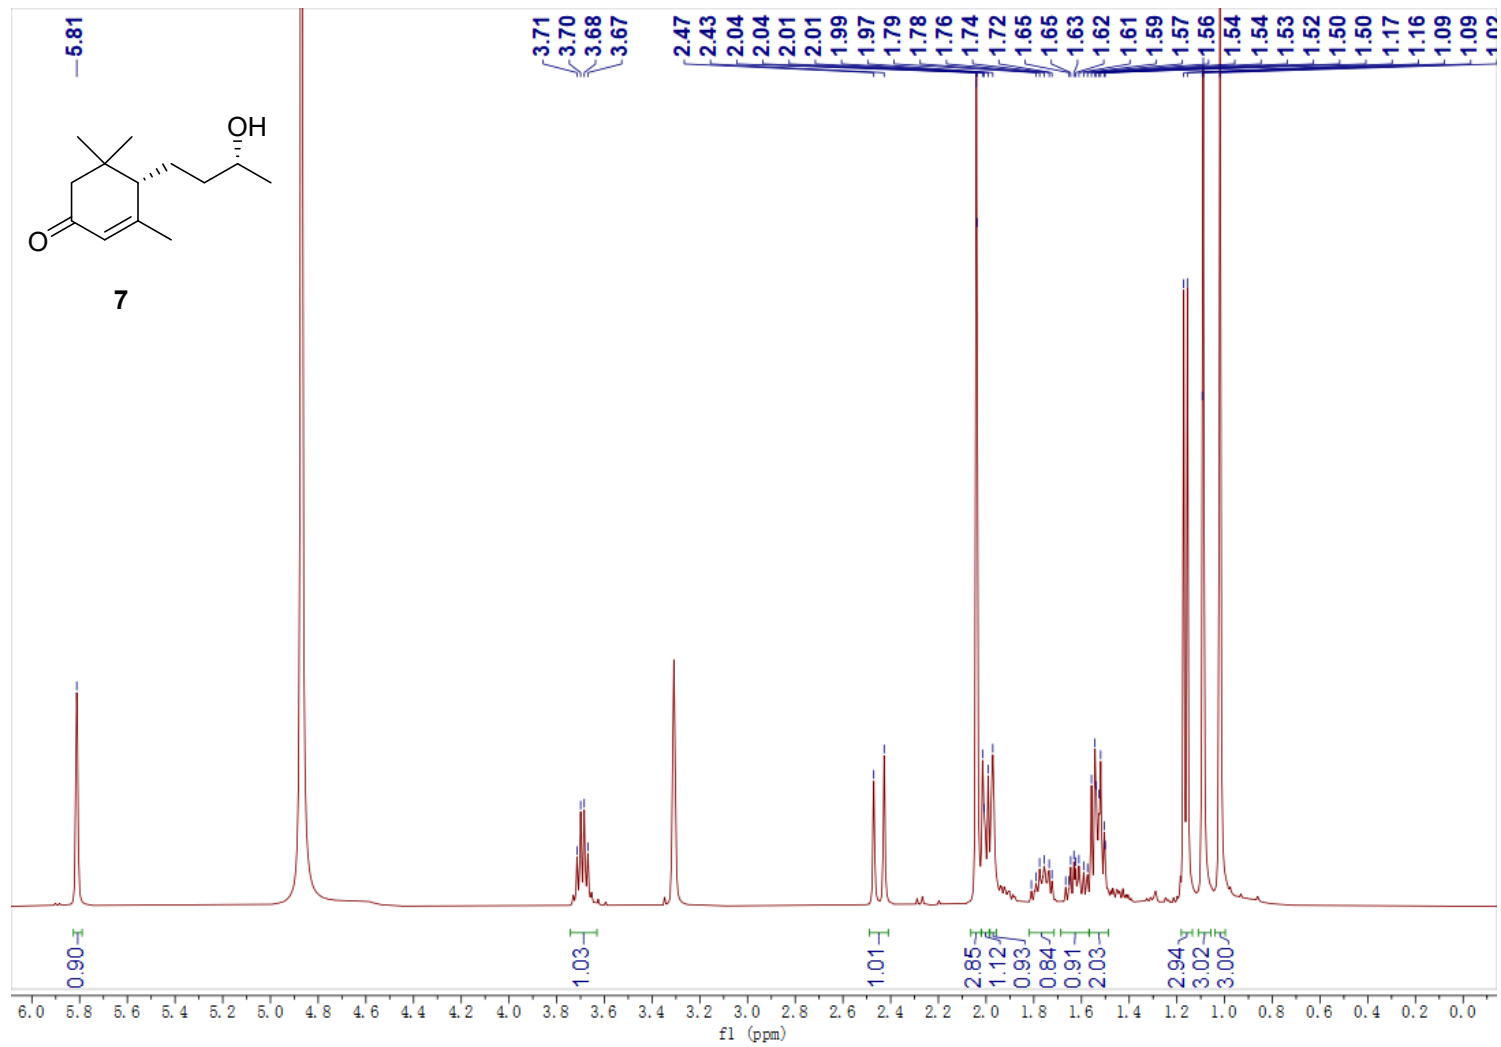

Figure S36.  $^{13}\text{C}$  NMR spectrum of compound 7 in methanol- $d_4$  (125 MHz)

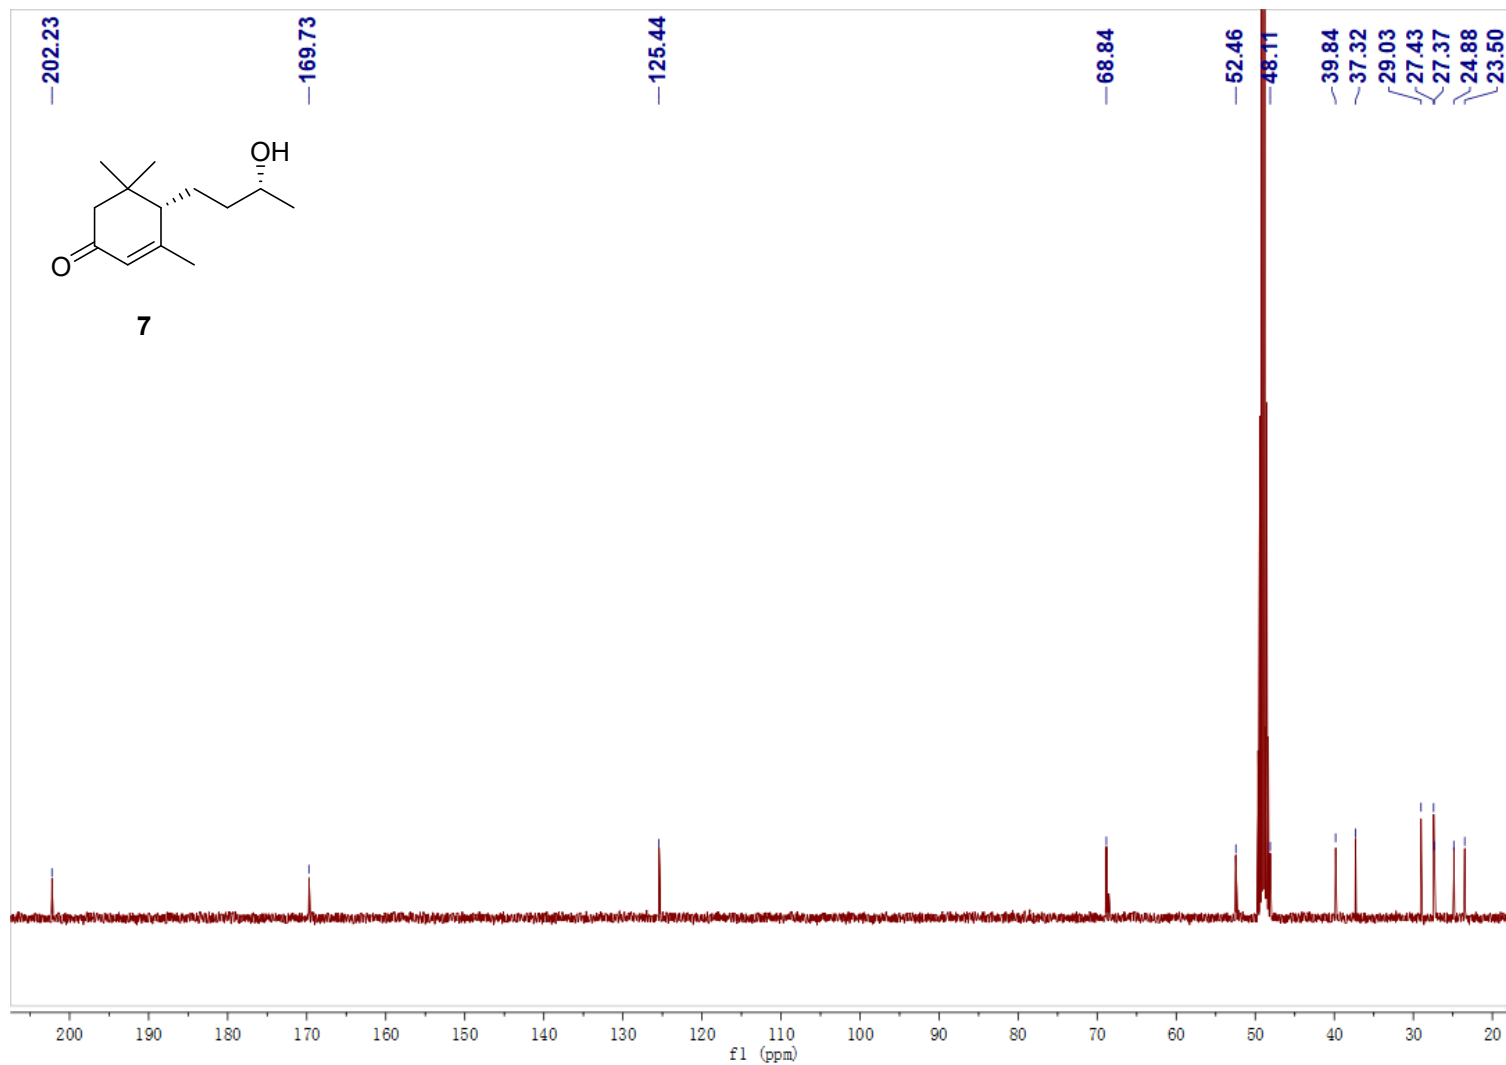

Figure S37. <sup>1</sup>H NMR spectrum of compound **8** in methanol-*d*<sub>4</sub> (600 MHz)

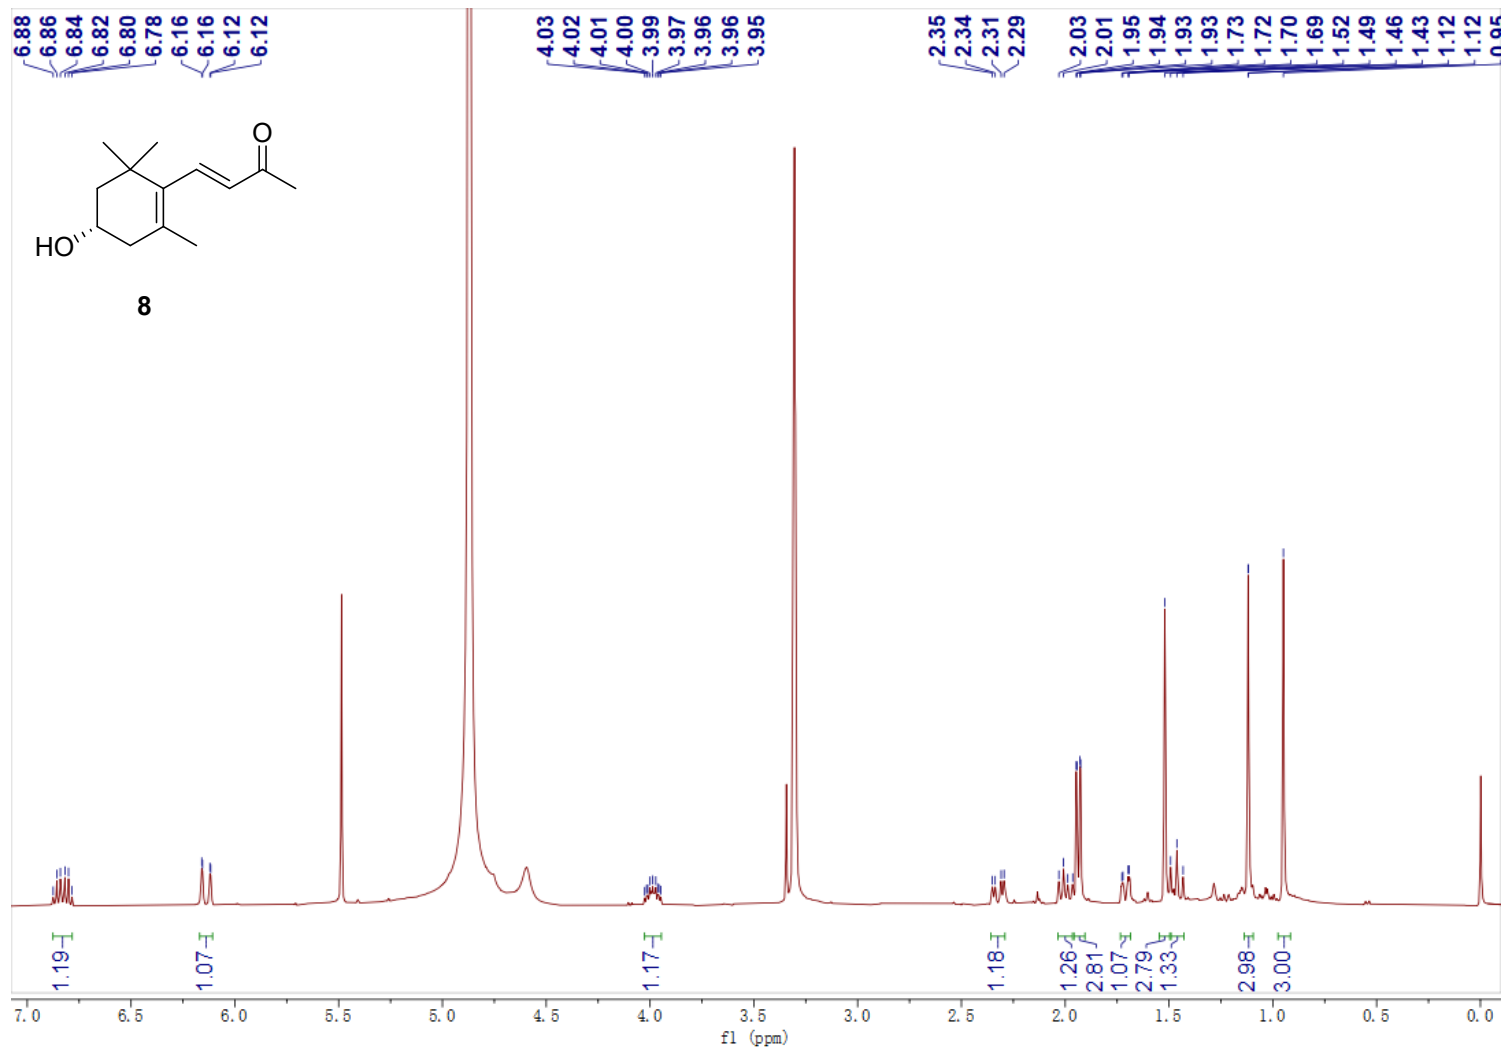

Figure S38.  $^{13}\text{C}$  NMR spectrum of compound **8** in methanol- $d_4$  (125 MHz)

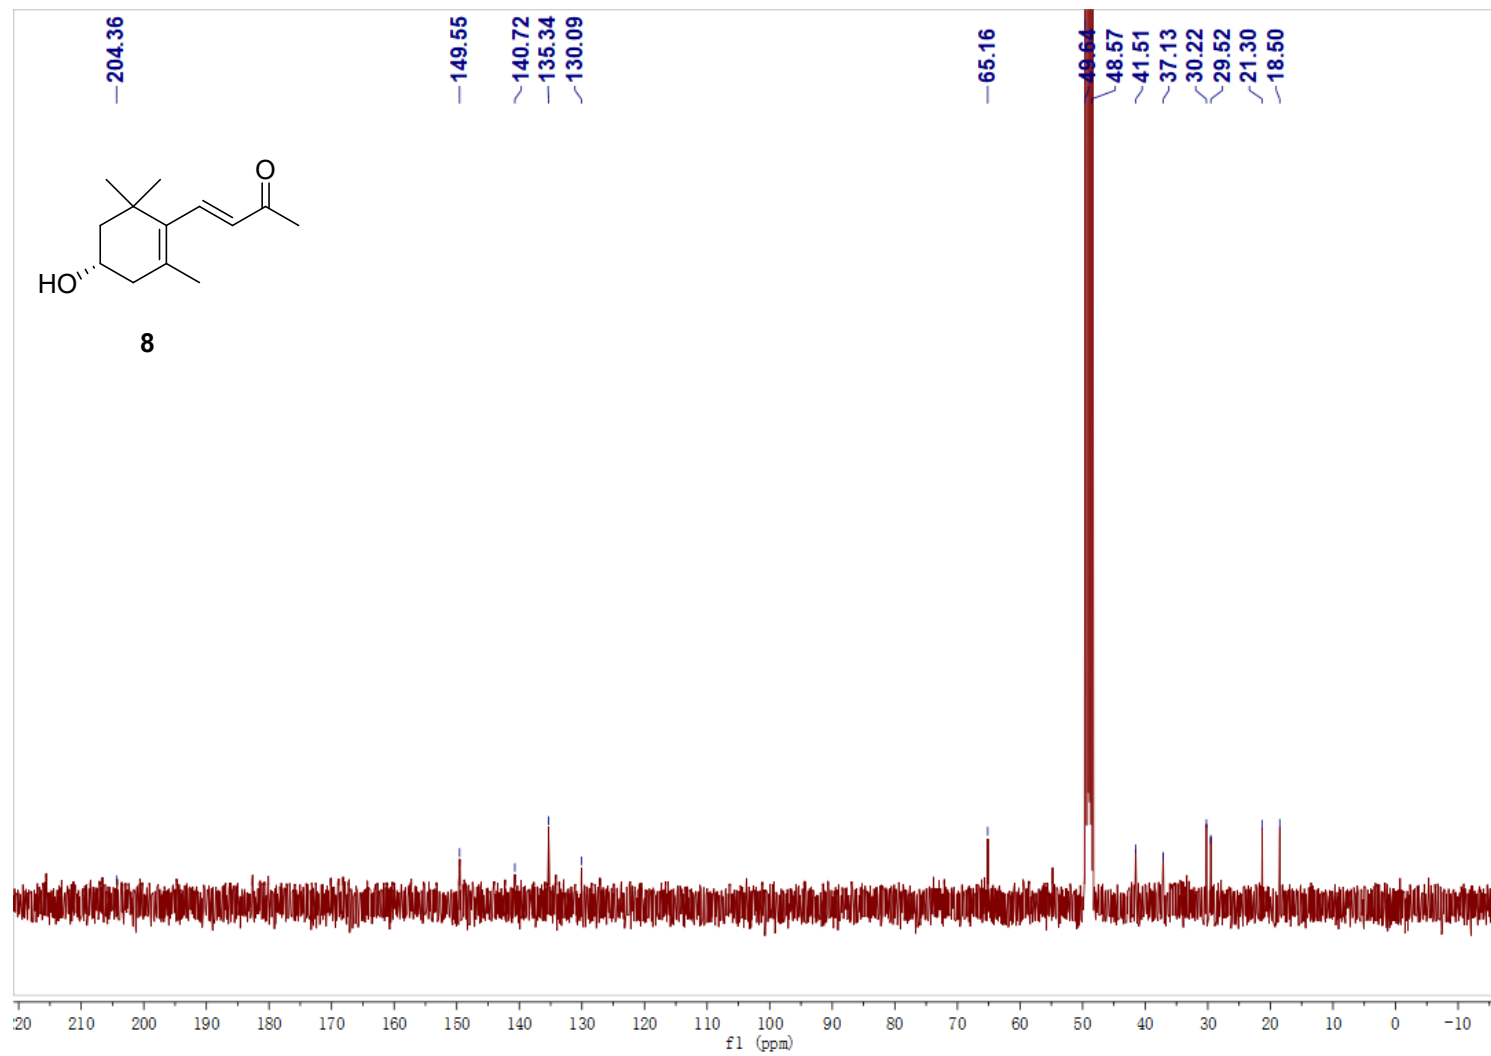

Figure S39.  $^1\text{H}$  NMR spectrum of compound **9** in methanol- $d_4$  (600 MHz)

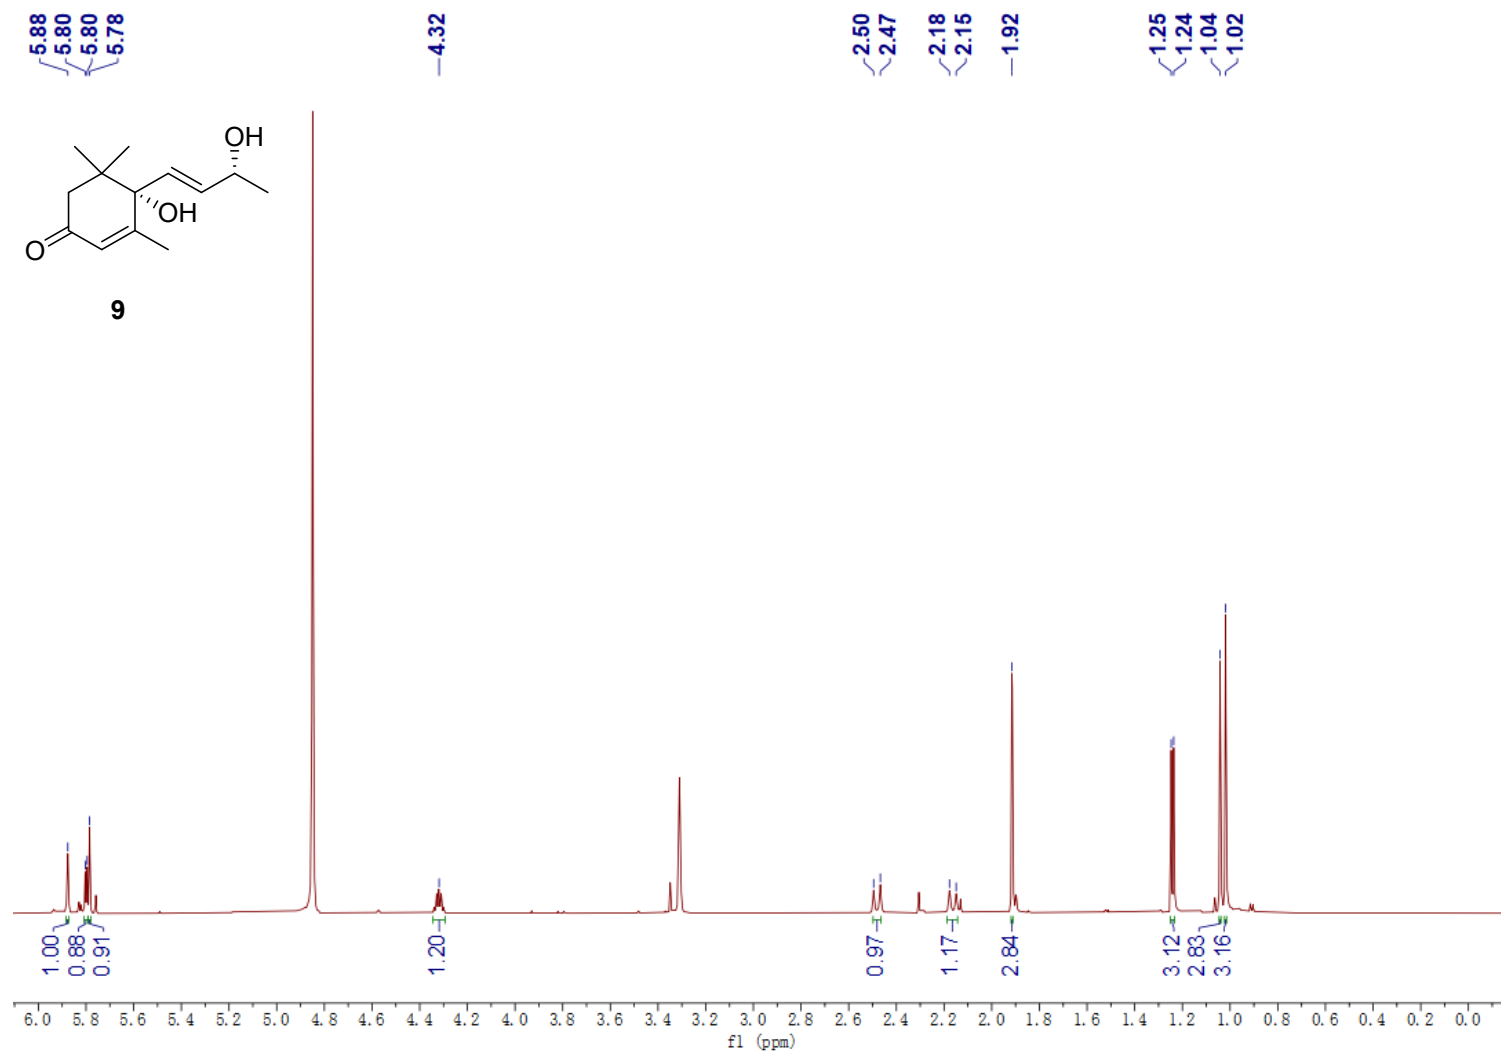

Figure S40.  $^{13}\text{C}$  NMR spectrum of compound **9** in methanol- $d_4$  (125 MHz)

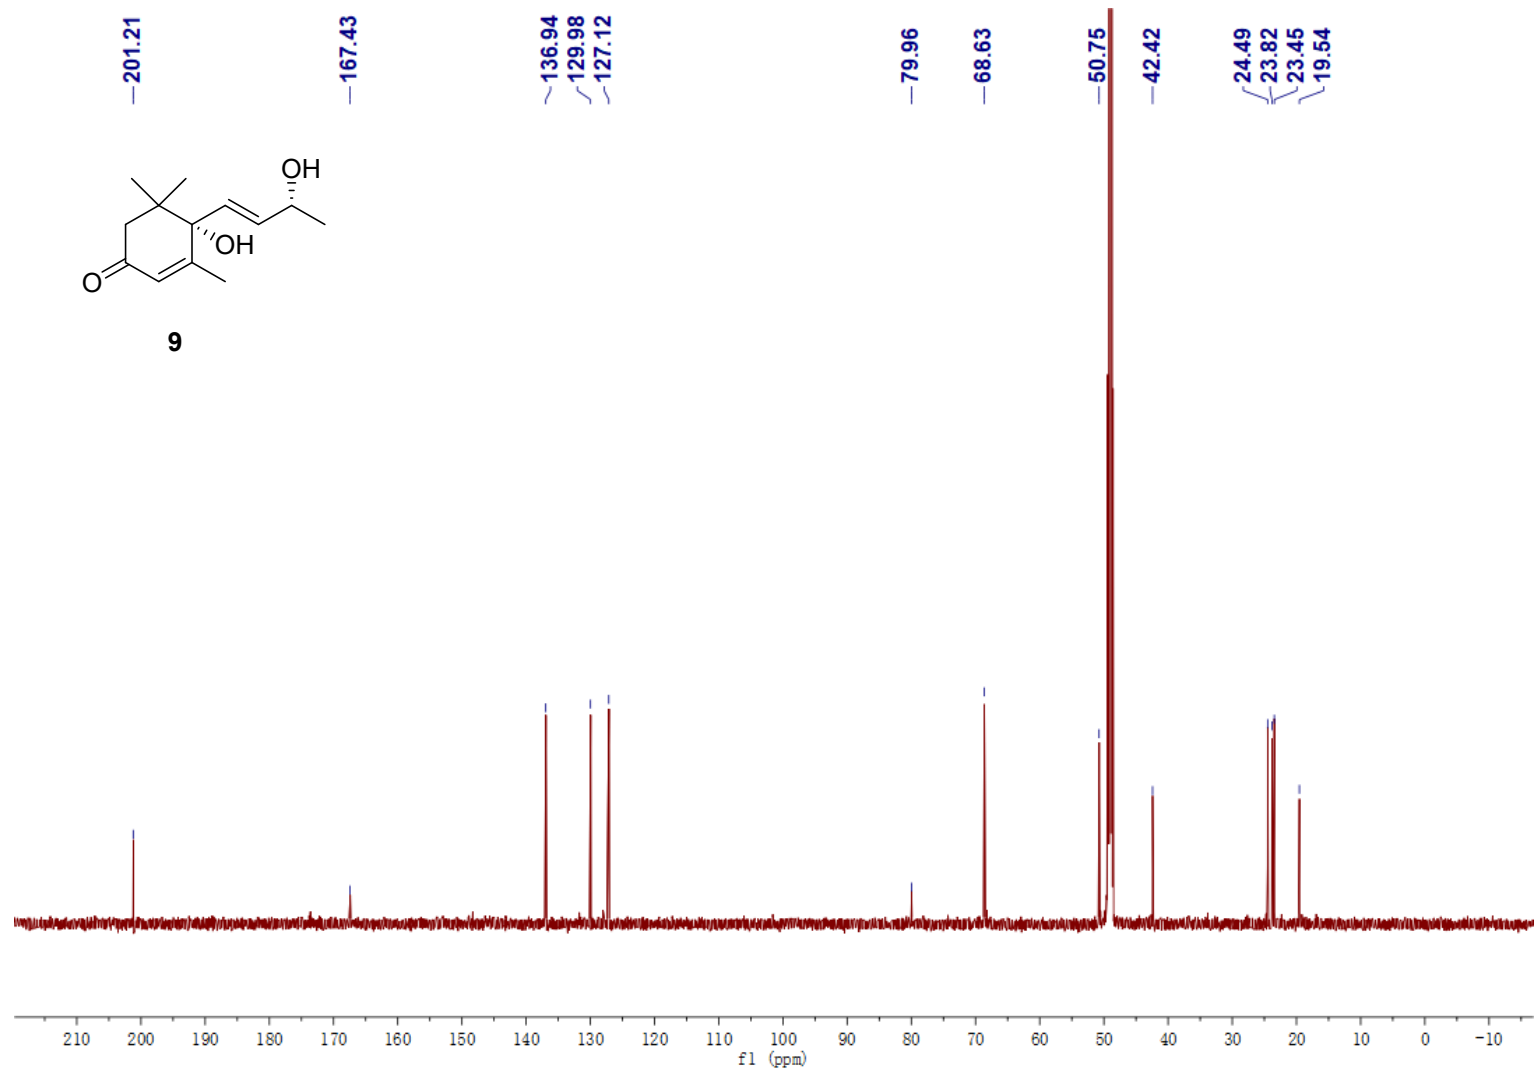

Figure S41.  $^1\text{H}$  NMR spectrum of compound **10** in methanol- $d_4$  (600 MHz)

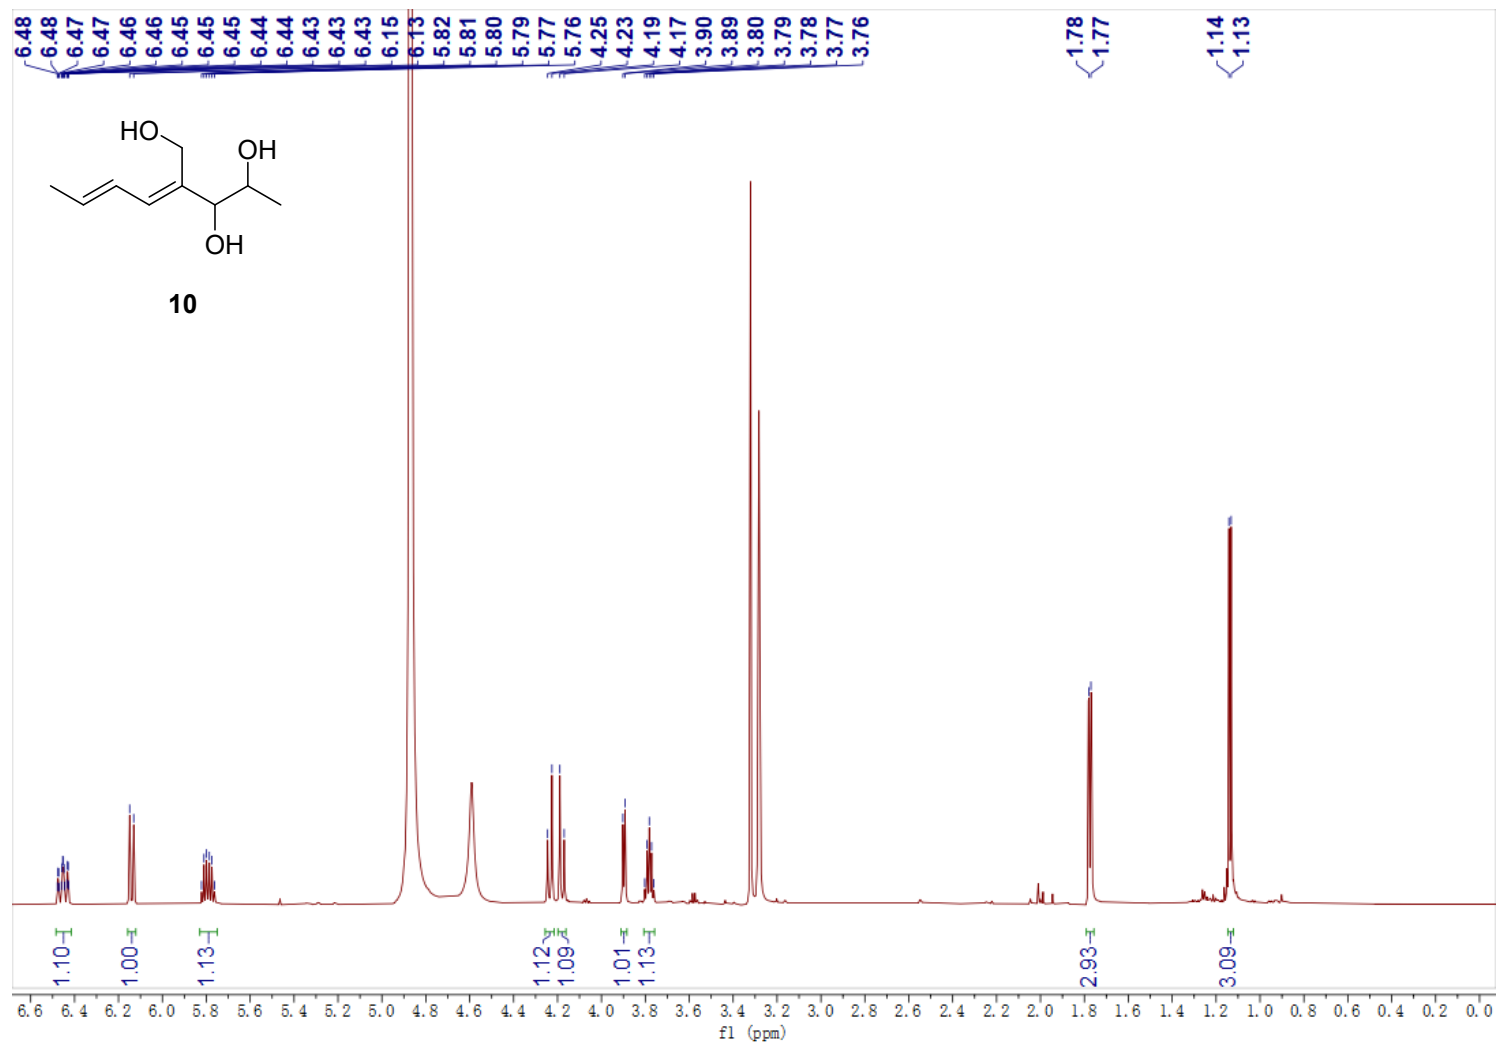



Figure S42.  $^{13}\text{C}$  NMR spectrum of compound **10** in methanol- $d_4$  (125 MHz)

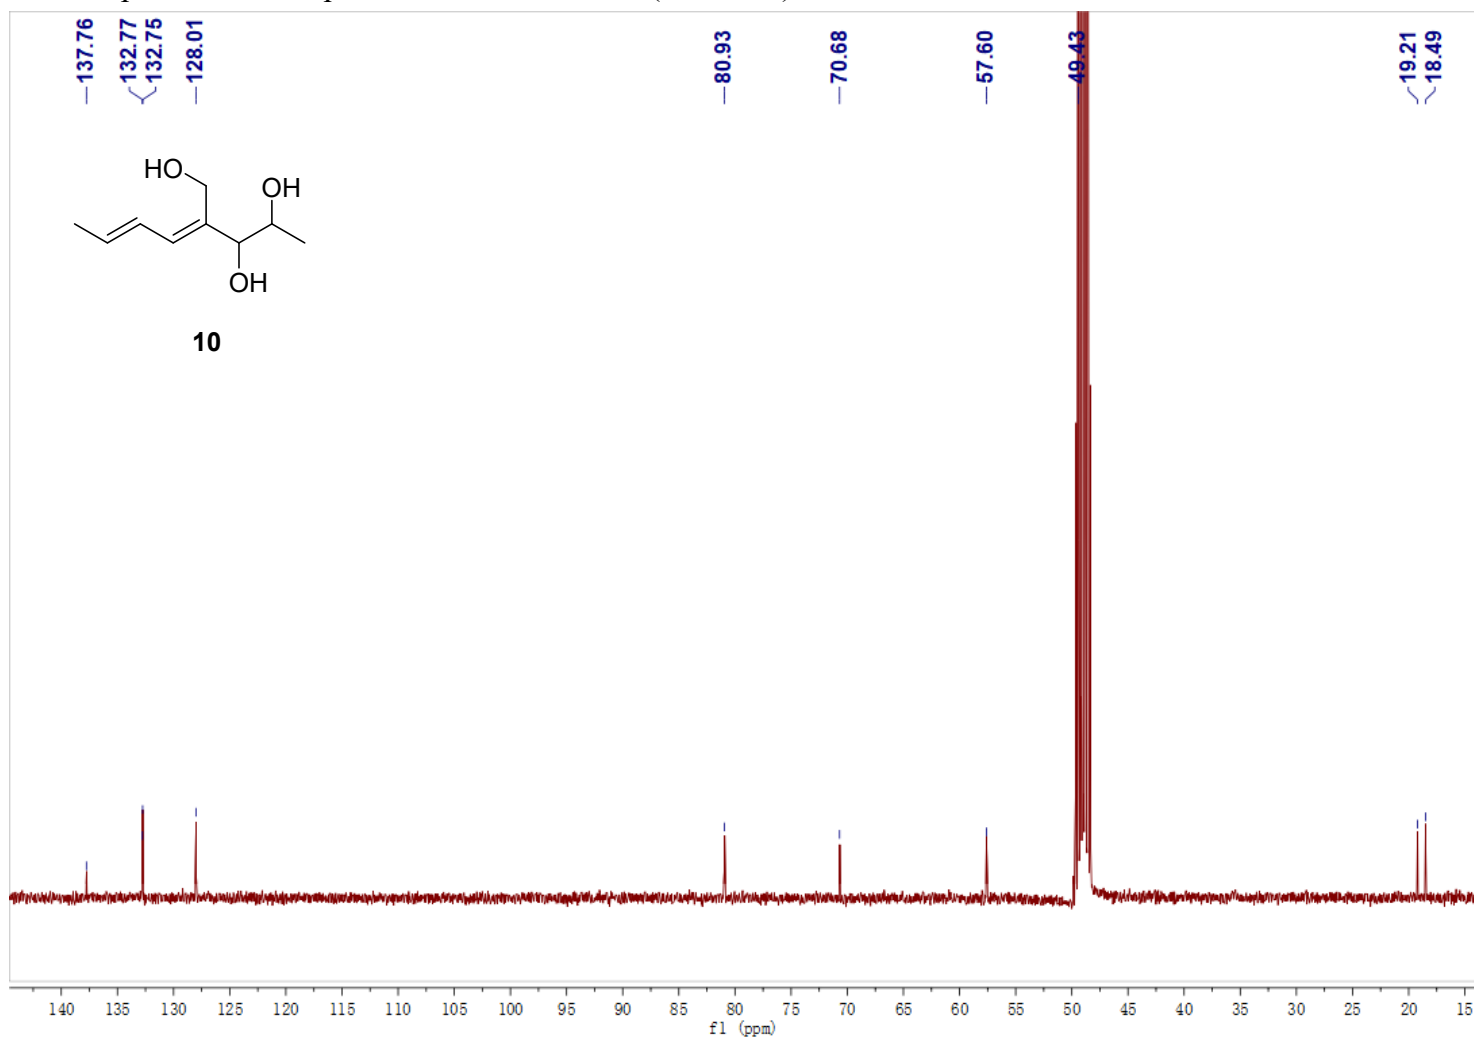

Figure S43.  $^1\text{H}$  NMR spectrum of compound **11** in methanol- $d_4$  (600 MHz)

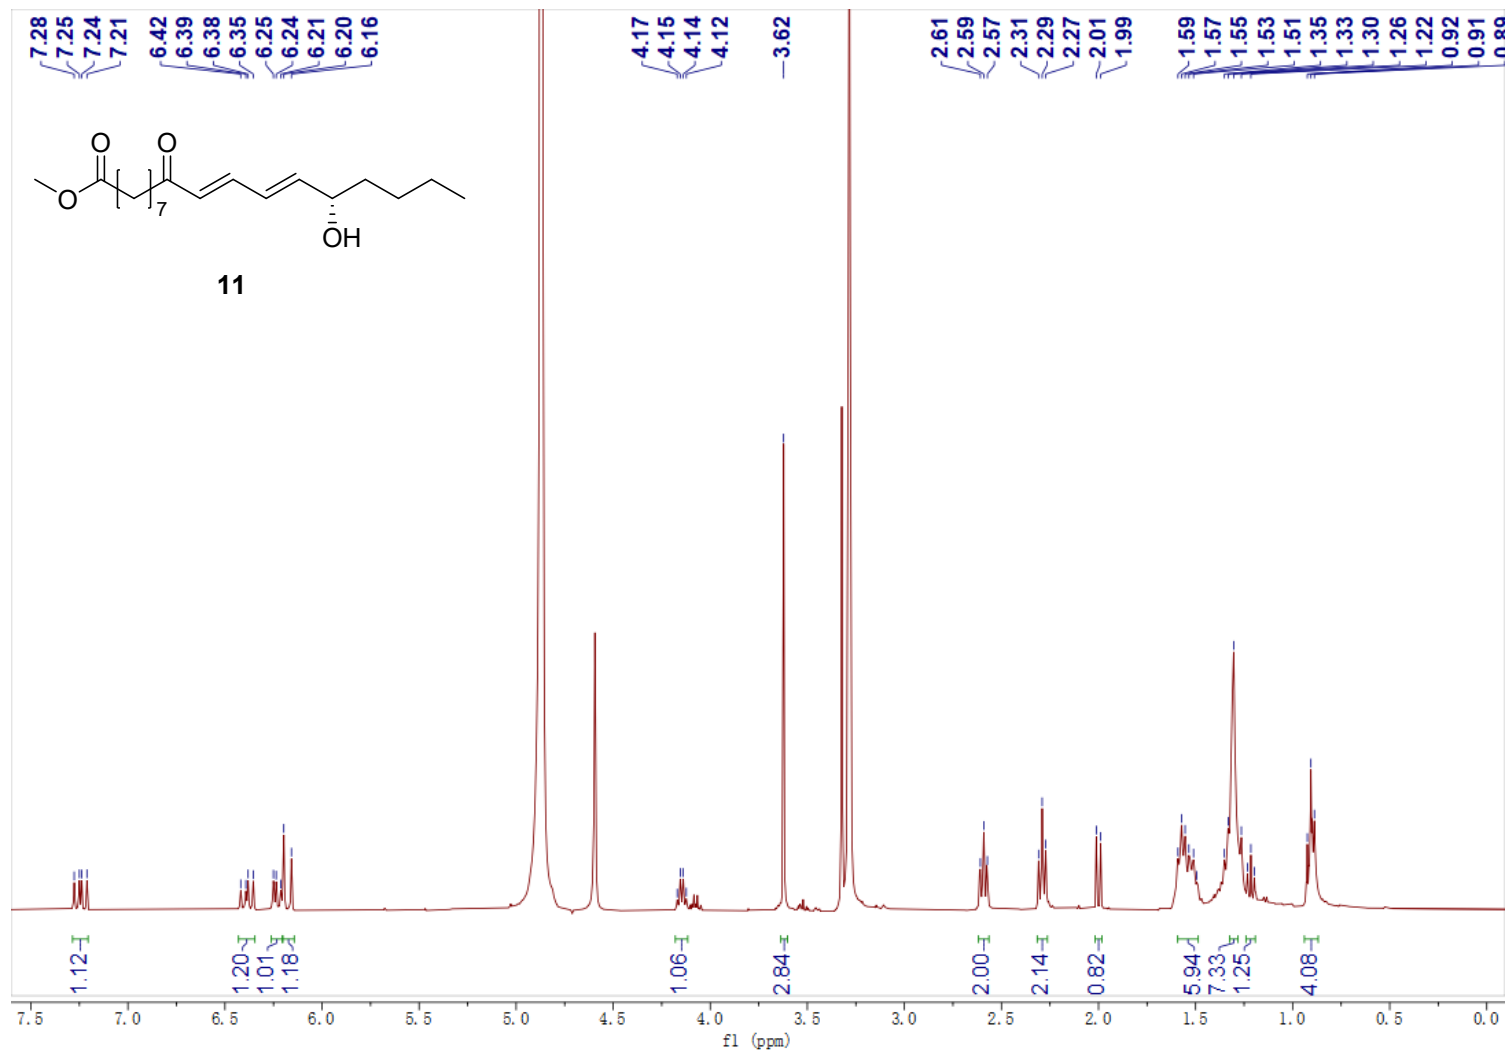

Figure S44.  $^{13}\text{C}$  NMR spectrum of compound **11** in methanol- $d_4$  (125 MHz)

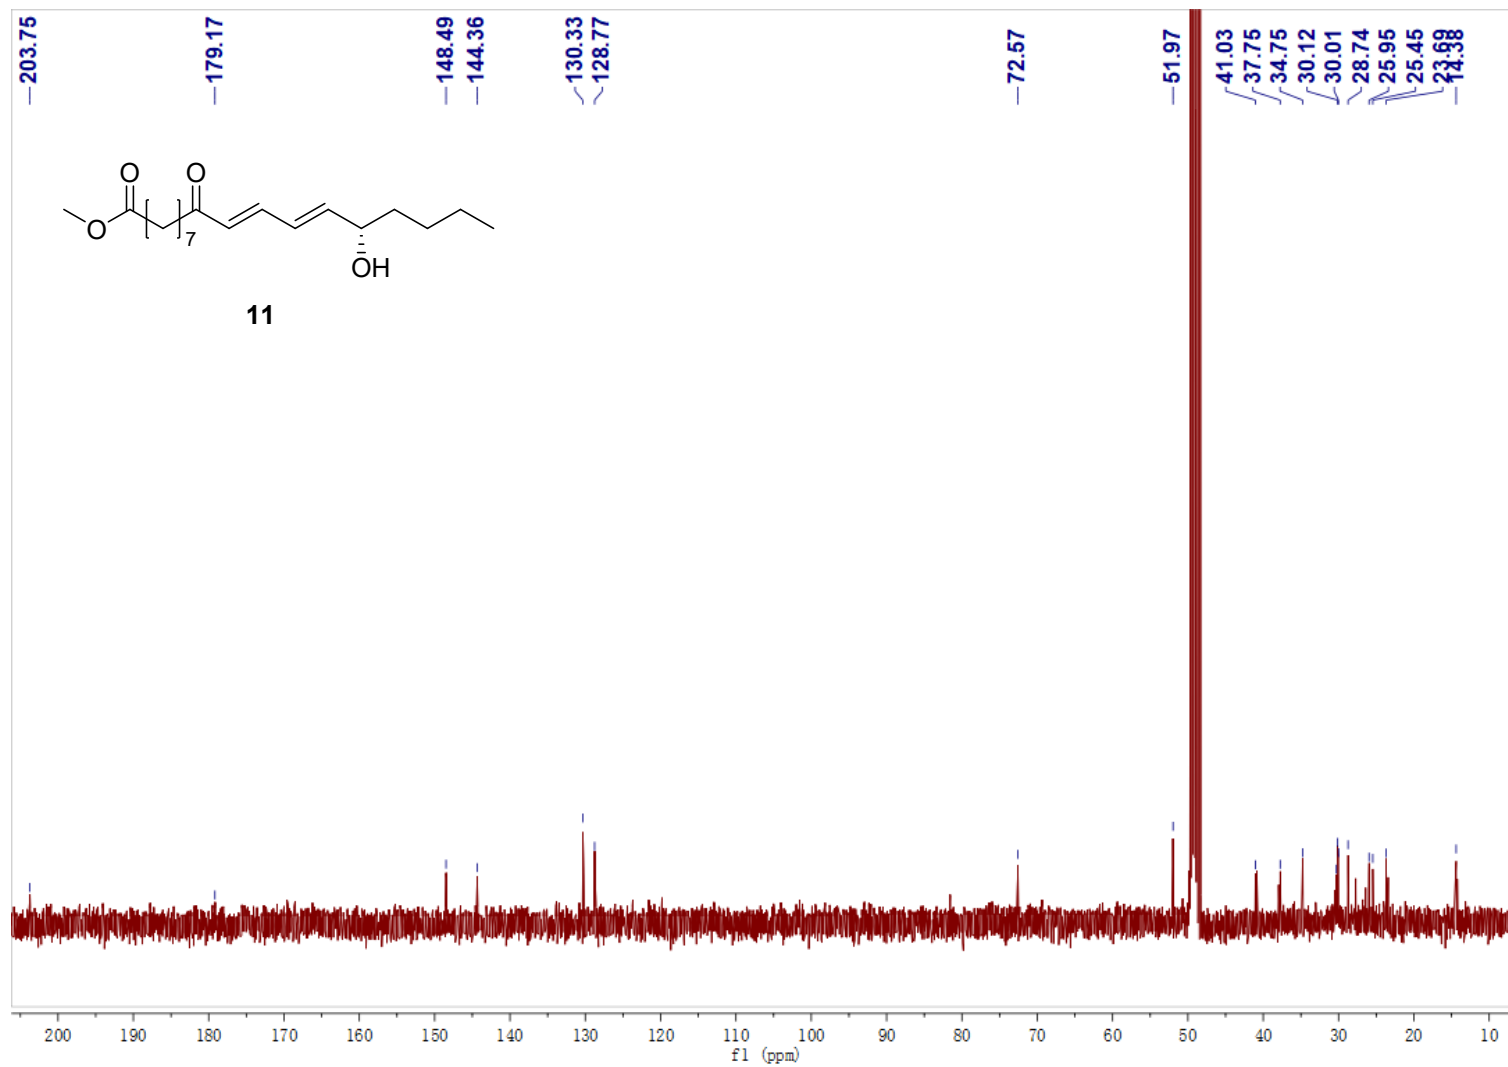

Figure S45.  $^1\text{H}$  NMR spectrum of compound **12** in methanol- $d_4$  (600 MHz)

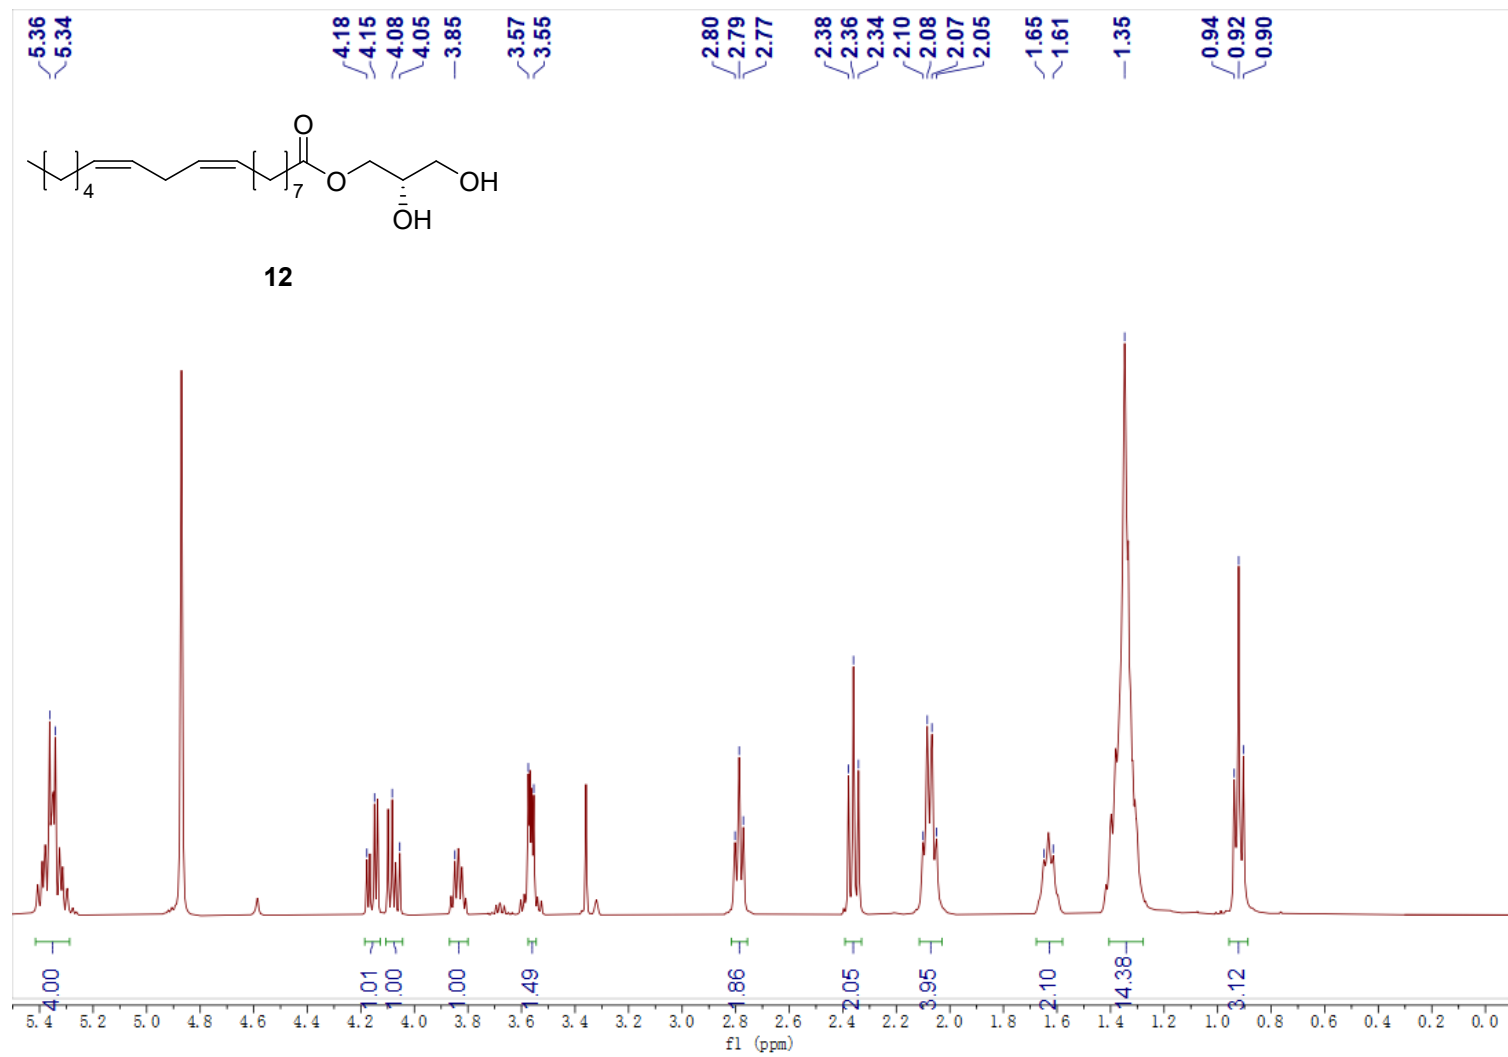

Figure S46.  $^{13}\text{C}$  NMR spectrum of compound **12** in methanol- $d_4$  (125 MHz)

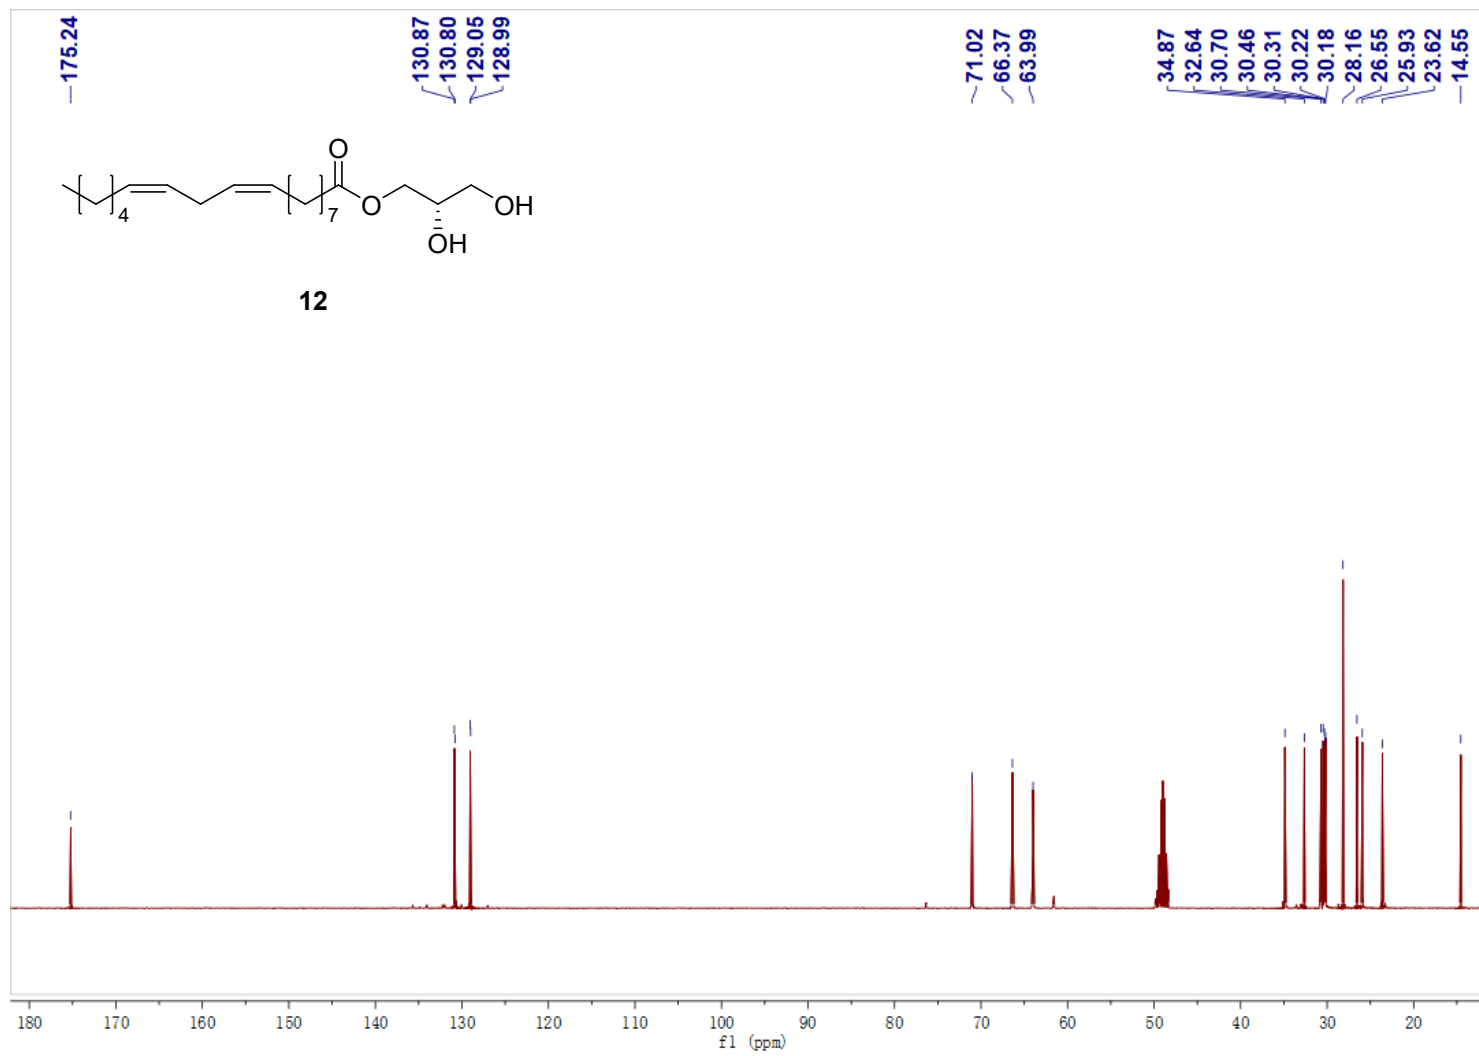

Figure S47. <sup>1</sup>H NMR spectrum of compound **13** in methanol-*d*<sub>4</sub> (600 MHz)

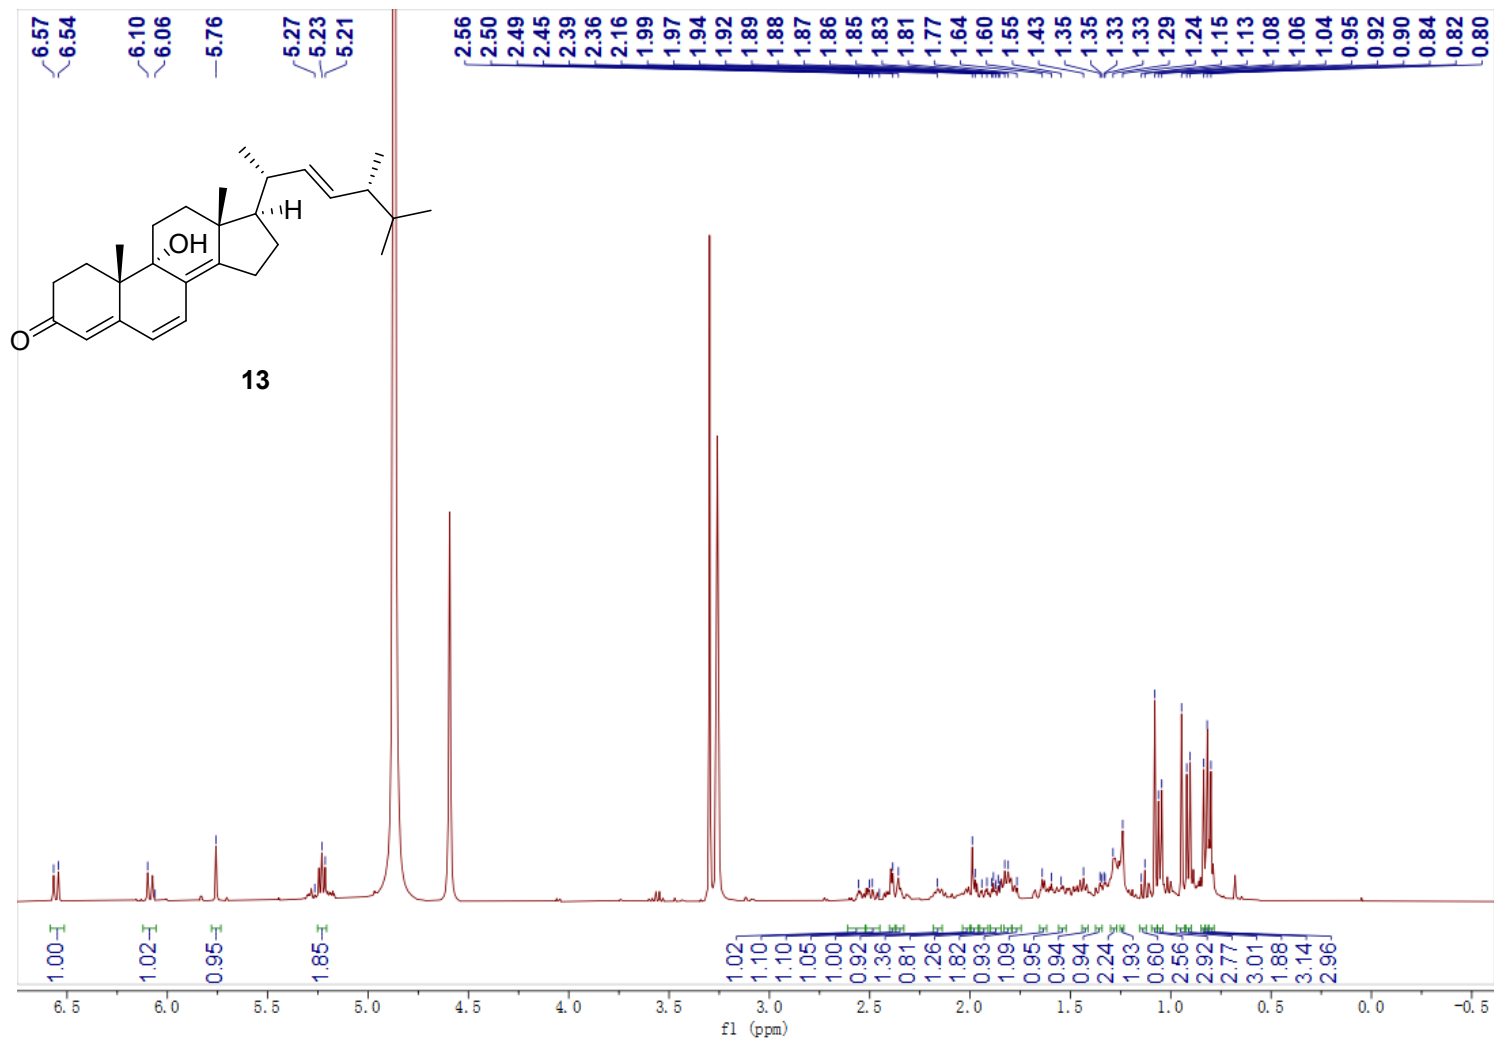

Figure S48.  $^{13}\text{C}$  NMR spectrum of compound **13** in methanol- $d_4$  (125 MHz)

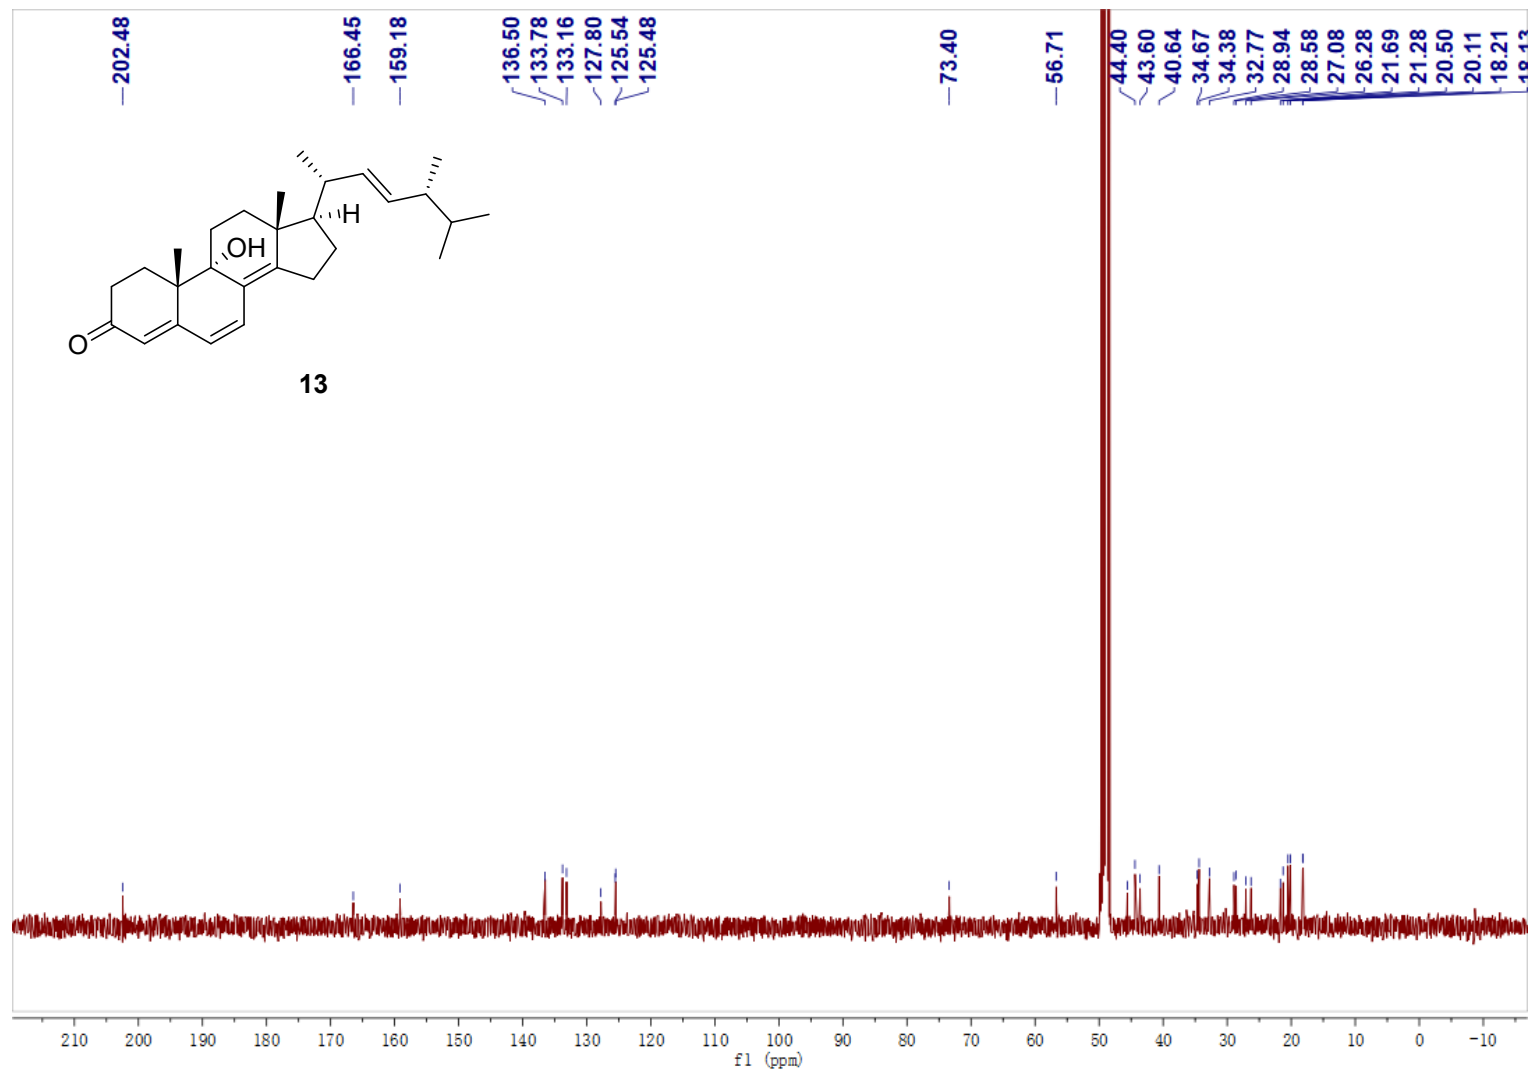

Supplement: d4nj02991g1.pdf [file d4nj02991g1.pdf]
